1 Classification: Biological Sciences (minor: Plant Biology)

2

3

4 A genetic link between whole-plant water use efficiency and leaf carbon isotope  
5 composition in the C<sub>4</sub> grass *Setaria*

6

7 Short title: Water use efficiency and C<sub>4</sub> leaf carbon isotopes

8

9 Patrick Z. Ellsworth (0000-0002-0795-5200)<sup>1‡</sup>, Max J. Feldman (0000-0002-5415-4326)<sup>2‡</sup>,  
10 Ivan Baxter (0000-0001-6680-1722)<sup>2</sup> Asaph B. Cousins (0000-0003-2424-714X)<sup>1</sup>

11 <sup>1</sup>School of Biological Sciences, Washington State University, PO Box 644236, Pullman,  
12 WA 99164

13 <sup>2</sup>Donald Danforth Plant Sciences Center, 975 N Warson Road, St. Louis, MO 63132

14

15

16 Corresponding author: Asaph B. Cousins

17

18

19 Key words: quantitative trait loci, leaf carbon isotopes, C<sub>4</sub> photosynthesis, *Setaria*,

20 ‡ Co-first authors

21

## 22 **Abstract**

23 Increasing whole plant water use efficiency (yield per transpiration;  $WUE_{\text{plant}}$ ) through  
24 plant breeding can benefit the sustainability of agriculture and improve crop yield  
25 under drought. To select for  $WUE_{\text{plant}}$ , an efficient phenotyping method that reports on  
26 the genetic contribution of component traits such as transpiration efficiency ( $TE_i$ ; rate of  
27  $CO_2$  assimilation per stomatal conductance) must be developed. Leaf carbon stable  
28 isotope composition ( $\delta^{13}C_{\text{leaf}}$ ) has been proposed as a high-throughput proxy for  $TE_i$ ,  
29 and a negative correlation between  $\delta^{13}C_{\text{leaf}}$  and both  $WUE_{\text{plant}}$  and  $TE_i$  has previously  
30 been demonstrated in several  $C_4$  grass species. Therefore, the aim of the research  
31 presented here was to determine if the same loci control  $\delta^{13}C_{\text{leaf}}$ ,  $WUE_{\text{plant}}$ , and  $TE_i$  under  
32 well-watered and water-limited conditions in a recombinant inbred line (RIL)  
33 population of closely related  $C_4$  grasses *Setaria viridis* and *S. italica*. Three quantitative  
34 trait loci (QTL) for  $\delta^{13}C_{\text{leaf}}$  were co-localized with transpiration, biomass, and a linear  
35 model of WUE. When  $WUE_{\text{plant}}$  was calculated for allele classes based on the three QTL  
36 for  $\delta^{13}C_{\text{leaf}}$ ,  $\delta^{13}C_{\text{leaf}}$  was negatively correlated with  $WUE_{\text{plant}}$  as theory predicts when  
37  $WUE_{\text{plant}}$  is in part driven by differences in  $TE_i$ . In any population, multiple traits can  
38 influence  $WUE_{\text{plant}}$ ; however, the analysis of  $\delta^{13}C_{\text{leaf}}$  in this RIL population demonstrates  
39 that there is genetic control of  $TE_i$  that significantly contributes to  $WUE_{\text{plant}}$ .  
40 Furthermore, this research suggests that  $\delta^{13}C_{\text{leaf}}$  can be used in marker-assisted breeding  
41 to select for  $TE_i$  and as a tool to better understand the physiology and genetic  
42 architecture of  $TE_i$  and  $WUE_{\text{plant}}$  in  $C_4$  species.

43

## 44 **Significance Statement**

45 Overextended water resources and drought are major agricultural problems  
46 worldwide. Therefore, selection for increased plant water use efficiency ( $WUE_{\text{plant}}$ ) in  
47 food and biofuel crop species is an important trait in plant breeding programs. Leaf  
48 carbon isotopic composition ( $\delta^{13}C_{\text{leaf}}$ ) has potential as a rapid and effective high  
49 throughput phenotyping method for intrinsic transpiration efficiency ( $TE_i$ ), an  
50 important leaf-level component trait of  $WUE_{\text{plant}}$ . Our research shows that  $\delta^{13}C_{\text{leaf}}$  and  
51  $WUE_{\text{plant}}$  share a common genetic architecture through their shared relationship with  
52  $TE_i$ . This suggests that  $\delta^{13}C_{\text{leaf}}$  can be used as a screen for  $TE_i$  in marker-assisted plant  
53 breeding programs to improve crop drought resistance and decrease agricultural water  
54 consumption.

55

## 56 Introduction

57 Water availability constrains agricultural production and threatens food security  
58 in many drought-prone regions (1). Therefore, improving the harvestable yield relative  
59 to water supplied to crop systems (agronomic water use efficiency;  $WUE_{ag}$ ) has long  
60 received attention from researchers and government agencies (2-5). It has been  
61 proposed by Passioura (2) that yield could be improved relative to available water by  
62 increasing (1) the ratio of transpiration ( $T$ ) to evapotranspiration ( $ET$ ), (2) whole plant  
63 water use efficiency (ratio of biomass production to total transpiration;  $WUE_{plant}$ ), and  
64 (3) harvest index (HI). To date, increases in  $WUE_{ag}$  have been primarily made by  
65 improved management practices that increase  $T/ET$  through improved water  
66 application (6, 7), increased canopy cover (8) and mulching (6). Additionally, selecting  
67 for greater HI has also increased  $WUE_{ag}$ , for example, with semi-dwarf wheat varieties  
68 (9). Unfortunately, in many agricultural settings, these traits appear to have approached  
69 their theoretical maximum.

70 To date, there has been limited change to  $WUE_{ag}$  through selection for increased  
71  $WUE_{plant}$ . This is primarily because  $WUE_{plant}$  is a complex trait and is influenced by 1)  $CO_2$   
72 assimilation ( $A_{net}$ ) relative to water loss via stomata conductance ( $g_s$ ), (i.e. the intrinsic  
73 transpiration efficiency,  $A_{net}/g_s$ ;  $TE_i$ ), 2) the portion of carbon loss from whole plant  
74 respiration ( $\phi_c$ ), 3) “nonproductive” water loss from cuticular and nighttime  
75 transpiration ( $\phi_w$ ), and 4) the evaporative demand between the atmosphere and the  
76 plant (See theory; 10, 11, 12). Theoretically, the first three of these factors can be selected  
77 for through plant breeding, but these traits, especially  $\phi_c$  and  $\phi_w$ , are determined by a  
78 complex set of composite traits that are difficult to measure and select for in breeding  
79 programs (13-15). Alternatively, in theory,  $TE_i$  is an ideal trait to select for because it is  
80 independent of environmental conditions driving changes in evaporative demands (16,  
81 17), and it is an important component of  $WUE_{plant}$  as it relates to both  $CO_2$  and  $H_2O$  leaf  
82 exchange, influencing both photosynthetic capacity and  $T$  (15, 18). Unfortunately, the  
83 primary means of estimating  $TE_i$  with gas exchange measurements of  $A_{net}/g_s$  do not  
84 integrate over time and generally do not represent  $TE_i$  over the lifetime of the plant or  
85 even the leaf (18). Furthermore, these measurements are prohibitively time-consuming  
86 and laborious, making this method impractical for selecting for  $WUE_{plant}$  in a plant-  
87 breeding program.

88           Alternatively, leaf carbon isotope composition ( $\delta^{13}\text{C}_{\text{leaf}}$ ) has long been promoted  
89 as a proxy for an integrated measurement of  $\text{TE}_i$  in  $\text{C}_3$  and potentially in  $\text{C}_4$  species (10-  
90 12, 19, 20). In  $\text{C}_3$  plants, the relationship between  $\delta^{13}\text{C}_{\text{leaf}}$  and  $\text{TE}_i$  has been tested and  
91 even integrated into breeding programs (12, 15, 18, 21-26). However, in  $\text{C}_4$  species, it  
92 remains uncertain if  $\delta^{13}\text{C}_{\text{leaf}}$  is an effective proxy for  $\text{TE}_i$  and if there is a genetic link  
93 between these two traits. Nonetheless, empirical evidence supporting the theoretical  
94 relationship between  $\delta^{13}\text{C}_{\text{leaf}}$  and  $\text{TE}_i$  has been documented in multiple  $\text{C}_4$  species such  
95 as *Setaria viridis*, *S. italica*, *Zea mays*, and *Sorghum bicolor* (27-29). These studies also  
96 demonstrated consistent differences in  $\delta^{13}\text{C}_{\text{leaf}}$  between well-watered and water-limited  
97 plants that negatively correlated with  $\text{TE}_i$ . Additionally, in *S. viridis* and *S. italica*,  $\text{TE}_i$   
98 correlated with  $\text{WUE}_{\text{plant}}$  (29). However, other studies on both  $\text{C}_3$  and  $\text{C}_4$  species have  
99 found that  $\text{TE}_i$  and  $\text{WUE}_{\text{plant}}$  were not correlated (30-40). Therefore, the contribution of  
100  $\text{TE}_i$  to  $\text{WUE}_{\text{plant}}$  requires further investigations to delineate those factors that collectively  
101 contribute to  $\text{WUE}_{\text{plant}}$ .

102           The genetic loci controlling  $\text{WUE}_{\text{plant}}$  and its relationship to  $\text{TE}_i$  and  $\delta^{13}\text{C}_{\text{leaf}}$  can  
103 potentially be identified using large mapping populations grown on automated  
104 phenotyping systems that measure plant water use and biomass accumulation on  
105 hundreds of individual plants (41, 42). In fact, quantitative trait loci (QTL) have been  
106 found for  $\delta^{13}\text{C}_{\text{leaf}}$  in several  $\text{C}_3$  species such as rice (43-45), barley (46), *Brachypodium*  
107 *distachyon* (47), wheat (48), tomato (49), Arabidopsis (50, 51), sunflower (52), soybean  
108 (53), cotton (54), *Quercus ruber* (55), and *Stylosanthes scabra* (56). Additionally, a few  
109 studies on  $\text{C}_3$  plants have found co-localized QTL for  $\delta^{13}\text{C}_{\text{leaf}}$  and  $\text{WUE}_{\text{plant}}$  (52, 57), and,  
110 in one case,  $\delta^{13}\text{C}_{\text{leaf}}$  and  $\text{TE}_i$  were associated with a causal gene (ERECTA; 58). However,  
111 to date only one publication found that  $\delta^{13}\text{C}$  was under genetic control in a  $\text{C}_4$  species  
112 (maize; 59), but this was not tested in terms of WUE. Therefore, to effectively use  
113 marker-assisted breeding to select for  $\text{WUE}_{\text{plant}}$  and  $\text{TE}_i$  in  $\text{C}_4$  plants requires a more  
114 thorough understanding of the physiological relationship and genetic architecture of  
115  $\delta^{13}\text{C}_{\text{leaf}}$ ,  $\text{TE}_i$ , and  $\text{WUE}_{\text{plant}}$ .

116           Here a recombinant inbred line (RIL) population of 189 lines created from  
117 accession A10 of *S. viridis* (L.) P. Beauv. and accession B100 of *S. italica* (L.) P. Beauv was  
118 used to screen for  $\text{WUE}_{\text{plant}}$ ,  $\text{TE}_i$ , and  $\delta^{13}\text{C}_{\text{leaf}}$  (42, 60, 61). Both *S. viridis* and *S. italica* are  
119 model  $\text{C}_4$  grasses in the same panicoid clade as important  $\text{C}_4$  crops such as maize,  
120 sugarcane, sorghum and emerging bioenergy crops Miscanthus and switchgrass. The

121 objectives of this study were to compare  $\delta^{13}\text{C}_{\text{leaf}}$  between plants grown under well-  
122 watered and water-limited conditions and to determine the genetic and physiological  
123 relationship between  $\text{WUE}_{\text{plant}}$ ,  $\text{TE}_i$ , and  $\delta^{13}\text{C}_{\text{leaf}}$ .

## 124 **Results**

### 125 *Fresh biomass, transpiration, $\text{WUE}_{\text{ratio}}$ , $\text{WUE}_{\text{fit}}$ , and $\text{WUE}_{\text{res}}$ traits*

126 Although whole plant growth and water use were analyzed throughout the  
127 experiment (42) we selected day 25 for our analysis when most genotypes were in the  
128 vegetative stage. On this day, the fresh biomass estimated from side view images and  
129 validated with final harvest biomass (42) varied across genotypes from 3.70 to 29.00 g  
130 and 1.40 to 10.30 g in the well-watered and water-limited treatments, respectively.  
131 Cumulative transpiration ranged from 367 to 1433 ml in the well-watered and 96 to 433  
132 ml in water-limited plants. There was a significant difference in fresh biomass and  
133 transpiration rates between genotypes in both irrigation treatments (Fig. 1), and across  
134 genotypes the water-limited treatment significantly reduced fresh biomass and  
135 transpiration by 64 and 65 %, respectively (Table 1). The ratio of biomass relative to the  
136 amount of total plant transpiration ( $\text{WUE}_{\text{ratio}}$ ) was 20 % higher in the water-limited  
137 treatment and ranged across genotypes from 1.2 to 36.7 (g/L) in the well-watered  
138 treatment and 3.9 to 41.7 (g/L) in the water-limited treatment, respectively (Table 1).

139 Across genotypes, output of the linear model of fresh biomass versus  
140 transpiration ( $\text{WUE}_{\text{fit}}$ ) ranged from 1.84 to 36.24 g in the well-watered and 0.49 to 9.94 g  
141 in the water-limited treatments (Table 1). In the well-watered treatment, the residual of  
142 the WUE model ( $\text{WUE}_{\text{res}}$ ) varied from -9.61 to 10.06 g and in the water-limited treatment  
143 from -6.22 to 2.25 g, with a significant genotype effect within each treatment. Because  
144  $\text{WUE}_{\text{res}}$  was calculated for each treatment separately and centered around 0, no  
145 difference was expected between treatments (Table 1).

### 146 *Broad-sense heritability, proportional variance and leaf carbon isotopic composition ( $\delta^{13}\text{C}_{\text{leaf}}$ )*

147 In all traits, except  $\text{WUE}_{\text{res}}$ , 32 to 86 % of the variance in the experiment was  
148 explained by the treatment effect (Table 2). Additionally, in all traits, except  $\text{WUE}_{\text{ratio}}$   
149 and  $\text{WUE}_{\text{res}}$ , the variance ascribed to the genotype effect was relatively small but  
150 substantial given the large influence that the water limitation treatment had on these  
151 traits.

152 Broad-sense heritability ( $H^2$ ) was relatively robust for all traits, including  $\delta^{13}\text{C}_{\text{leaf}}$ ,  
153 in at least one treatment or when treatments were combined (Table 2). For example,

154  $\delta^{13}\text{C}_{\text{leaf}}$  was significantly heritable in the well-watered treatment but not in the water-  
155 limited treatment. This is true of other traits, except  $\text{WUE}_{\text{res}}$ , where the well-watered  
156 treatment had higher  $H^2$  than the water-limited treatment or combined treatments. The  
157 decrease of  $H^2$  in the water-limited compared to the well-watered treatment was  
158 pronounced in all traits except fresh biomass and  $\text{WUE}_{\text{res}}$ . The  $\delta^{13}\text{C}_{\text{leaf}}$  values ranged  
159 from -14.7 to -12.4 ‰ in the well-watered and -15.6 to -13.2 ‰ in the water-limited  
160 treatment, with significant differences across genotypes (Fig. 1; Table 1). The water-  
161 limited treatment significantly reduced  $\delta^{13}\text{C}_{\text{leaf}}$  on average across genotypes by  $0.82 \pm$   
162  $0.04$  ‰ (Table 1).

### 163 *Correlation of traits with $\delta^{13}\text{C}_{\text{leaf}}$*

164 Over the time course of the experiment, the correlations of  $\delta^{13}\text{C}_{\text{leaf}}$  with  
165 transpiration, biomass, and  $\text{WUE}_{\text{fit}}$  were constant except for a few days at the beginning  
166 and end of the experiment, so at the midpoint of the experiment (day 25), correlations  
167 with  $\delta^{13}\text{C}_{\text{leaf}}$  were similar in magnitude to most days of the experiment. These  
168 correlations were stronger across treatments than within treatment, yet they were  
169 significant under the well-watered conditions (Fig. S1). On day 25, the correlation  
170 coefficients of  $\delta^{13}\text{C}_{\text{leaf}}$  with fresh biomass, transpiration, and  $\text{WUE}_{\text{fit}}$  were between 0.51  
171 and 0.61 across treatments and 0.30 to 0.33 for well-watered treatment (Fig. 1). For  
172  $\text{WUE}_{\text{ratio}}$  and  $\text{WUE}_{\text{res}}$ , the correlation coefficients were low in both treatments and when  
173 the treatments were combined (Fig. S1).

### 174 *QTL analysis and contributions of allele composition on traits*

175 Three QTL (chr. 7@51 centimorgans (cM), chr. 7@99 cM and chr. 9@34 cM)  
176 associated with  $\delta^{13}\text{C}_{\text{leaf}}$  were found in the well-watered treatment, but none were  
177 detected in the water-limited treatment (Table 3). All three of these QTL co-localized  
178 with  $\text{WUE}_{\text{fit}}$  and transpiration in both treatments on day 25 (as well as days 17 through  
179 33 as described in Feldman, *et al.* (42). Two QTL (7@99 and 9@34) were also associated  
180 with fresh biomass in both treatments (Table 3). Furthermore, one QTL (9@34) of  
181  $\text{WUE}_{\text{ratio}}$  was co-localized with  $\delta^{13}\text{C}_{\text{leaf}}$ .  $\text{WUE}_{\text{res}}$  were associated with two QTL (2@96 and  
182 5@109) that co-localized with fresh biomass, transpiration,  $\text{WUE}_{\text{ratio}}$ , and  $\text{WUE}_{\text{fit}}$  in both  
183 treatments, but not with  $\delta^{13}\text{C}_{\text{leaf}}$ . Having an allele from parental accession A10 (*S. viridis*)  
184 at two of the three loci (7@51 and 7@99) increased  $\delta^{13}\text{C}_{\text{leaf}}$  in the well-watered treatment,  
185 while an allele from parental line B100 (*S. italica*) increased  $\delta^{13}\text{C}_{\text{leaf}}$  at 9@34 in both  
186 treatments (Fig. S2).



187 Combining alleles from the three QTL associated with  $\delta^{13}\text{C}$  produced eight  
188 possible allele classes, and all but one (ABA) was present in this population. For six of  
189 the seven allele classes, the relationship between fresh biomass and transpiration was  
190 significant (Table 4; Fig. 2A). Furthermore, the regression of  $\delta^{13}\text{C}_{\text{leaf}}$  against the slopes of  
191 fresh biomass versus transpiration showed a strong negative relationship for both the  
192 well-watered ( $\delta^{13}\text{C}_{\text{leaf}} = -0.027$  slope  $- 12.48$ ;  $R^2 = 0.69$ ;  $P < 0.05$ ) and in the water-limited  
193 treatments ( $\delta^{13}\text{C}_{\text{leaf}} = -0.012$  slope  $- 13.82$ ;  $R^2 = 0.80$ ;  $P < 0.05$ ; Fig. 2B). Although this  
194 relationship was dampened in the water-limited treatment, it followed a similar trend  
195 (Fig. 2B). Additionally, the order that the allele classes are positioned along the  $\delta^{13}\text{C}_{\text{leaf}}$   
196 versus slope regression is the same in both treatments. In the well-watered treatment,  
197 the QTL 7@99 (represented by the second letter in three-letter allele class names)  
198 appears to have the greatest influence on this relationship, where the A10 allele was  
199 associated with a reduced slope and enriched  $\delta^{13}\text{C}_{\text{leaf}}$  (Fig. 2B). Alternatively, in the  
200 water-limited treatment, the effect of QTL 7@99 on this relationship was reduced  
201 relative to the well-watered treatment. Additionally, in both treatments the mean fresh  
202 biomass and transpiration for each of these allele classes had a strong significant  
203 positive relationship with  $\delta^{13}\text{C}_{\text{leaf}}$  (Fig. 3A-B).

## 204 Discussion

205 Leaf carbon isotope composition ( $\delta^{13}\text{C}_{\text{leaf}}$ ) has been theoretically related to  $\text{TE}_i$   
206 ( $A_{\text{net}}/g_s$ ) for both  $\text{C}_3$  and  $\text{C}_4$  species (12, 15, 18, 19, 27). However,  $\delta^{13}\text{C}_{\text{leaf}}$  is less well-  
207 understood in  $\text{C}_4$  species because the  $\text{CO}_2$ -concentrating mechanism dampens  
208 variability in leaf  $\text{CO}_2$  discrimination and ultimately  $\delta^{13}\text{C}_{\text{leaf}}$  (62). However, in this study  
209 we demonstrate significant genetic and environmental influence on  $\delta^{13}\text{C}_{\text{leaf}}$  in a  $\text{C}_4$   
210 species that is driven by differences in water use efficiency. Although the variation in  
211  $\delta^{13}\text{C}_{\text{leaf}}$  in  $\text{C}_4$  species is typically less than in  $\text{C}_3$  species, in this study, a relatively large  
212 range in  $\delta^{13}\text{C}_{\text{leaf}}$  (2.4 ‰) was observed across genotypes, and there was a significant  
213 mean  $0.82 \pm 0.04$  ‰ difference between treatments, showing considerable genotypic by  
214 treatment response. These results are similar to previous studies of well-watered and  
215 water-limited  $\text{C}_4$  plants (29, 63, 64), suggesting  $\delta^{13}\text{C}_{\text{leaf}}$  in  $\text{C}_4$  plants is both genetically  
216 determined and responsive to environmental conditions such as water limitation.

217 In the well-watered treatment, the positive correlations of fresh biomass,  
218 transpiration, and  $\text{WUE}_{\text{fit}}$  with  $\delta^{13}\text{C}_{\text{leaf}}$  and similarities in the genetic architecture of these  
219 traits, suggest that  $\text{TE}_i$  (as represented by  $\delta^{13}\text{C}_{\text{leaf}}$ ) is important in determining the

220 amount of biomass produced for a given volume of water transpired. However, in the  
221 water-limited plants the low variation of  $\delta^{13}\text{C}_{\text{leaf}}$ , the lack of  $\delta^{13}\text{C}_{\text{leaf}}$  correlations with  
222 other traits ( e.g.  $WUE_{\text{ratio}}$  and  $WUE_{\text{res}}$ ), and no QTLs for  $\delta^{13}\text{C}_{\text{leaf}}$  was likely due to  
223 restricted stomatal conductance ( $g_s$ ) across most genotypes, minimizing individual  
224 differences in  $TE_i$ , as found for  $C_3$  species (52, 65). As stated previously,  $WUE_{\text{res}}$   
225 represents how individuals deviate from  $WUE_{\text{fit}}$  either by  $A_{\text{net}}/g_s$  or other whole plant  
226 process. However, the lack of overlap in genetic architecture and the lack of correlation  
227 between  $WUE_{\text{res}}$  and  $\delta^{13}\text{C}_{\text{leaf}}$  suggest that  $TE_i$  is not the primary driver of  $WUE_{\text{res}}$ . The  
228 major QTL associated with  $WUE_{\text{res}}$  (2@96, 5@109) may potentially allocate carbon to  
229 non-transpiring biomass such as structural and stem tissue (66). Additionally, the  
230 similar genetic architecture for  $WUE_{\text{res}}$  and  $WUE_{\text{ratio}}$ , indicating that in this population  
231  $\phi_w$ ,  $\phi_c$ , and  $r$  influence variation in  $WUE_{\text{res}}$  of individual plants relative to  $WUE_{\text{fit}}$  (42).

232 Three QTL of  $WUE_{\text{fit}}$  co-localized with  $\delta^{13}\text{C}_{\text{leaf}}$  (7@51, 7@99, 9@34), suggesting that  
233 these loci are related to genotypic variation in  $TE_i$ . Based on the theoretical and  
234 empirical relationships,  $TE_i$  and  $\delta^{13}\text{C}_{\text{leaf}}$  should be negatively correlated (20, 27, 62).  
235 Therefore, if  $TE_i$  is a major contributor to  $WUE_{\text{plant}}$  within an allele class, then  $WUE_{\text{plant}}$   
236 should negatively correlate with  $\delta^{13}\text{C}_{\text{leaf}}$ . The  $WUE_{\text{plant}}$ , defined as the slope of the linear  
237 regression of fresh biomass versus transpiration (1, 67), was negatively correlated with  
238  $\delta^{13}\text{C}_{\text{leaf}}$  for each allele class. This suggests that  $\delta^{13}\text{C}_{\text{leaf}}$  is genetically and physiologically  
239 related to  $WUE_{\text{plant}}$ , likely through  $TE_i$ . This relationship between the allele class-specific  
240  $WUE_{\text{plant}}$  and  $\delta^{13}\text{C}_{\text{leaf}}$  existed in the water-limited treatment as well, although no QTL for  
241  $\delta^{13}\text{C}_{\text{leaf}}$  were found. Given that the water limitation did not remove the underlying  
242 relationship between  $TE_i$  and  $WUE_{\text{plant}}$ , the inability to detect QTL is likely due to the  
243 reduced variation in  $\delta^{13}\text{C}_{\text{leaf}}$ , which reduced the magnitude of the genotypic response  
244 and decreased the signal to noise ratio. Alleles increasing WUE were contributed by  
245 both the weedy *S. viridis* (A10 parental accession) and the domesticated *S. italica* (B100  
246 parental accession). In addition, allele classes followed the same order along the  $\delta^{13}\text{C}_{\text{leaf}}$   
247 versus slope regression in both well-watered and water-limited treatment blocks. For  
248 example, under both well-watered and water-limited conditions the allele class AAB  
249 had the lowest  $WUE_{\text{plant}}$  and most enriched  $\delta^{13}\text{C}_{\text{leaf}}$ ; whereas allele classes BBB and BBA  
250 had the highest  $WUE_{\text{plant}}$  and most depleted  $\delta^{13}\text{C}_{\text{leaf}}$  under both treatments. This trend  
251 indicates a strong allelic effect on relationship between  $\delta^{13}\text{C}_{\text{leaf}}$ ,  $TE_i$ , and  $WUE_{\text{plant}}$  that  
252 will allow the selection for  $\delta^{13}\text{C}_{\text{leaf}}$  to improve  $TE_i$ ,  $WUE_{\text{plant}}$ , and drought tolerance.



253 Across allele classes,  $\delta^{13}\text{C}_{\text{leaf}}$  also formed significant correlations with biomass  
254 and transpiration. A positive correlation between  $\delta^{13}\text{C}_{\text{leaf}}$  and fresh biomass is expected  
255 if large plants have low  $TE_i$  and small plants have high  $TE_i$ . This scenario is possible, if  
256 the photosynthetic capacity (i.e. chlorophyll and Rubisco) are diluted across large  
257 leaves. This will decrease the photosynthetic rates per unit leaf area but on a per plant  
258 basis would remain large relative to small plants with fewer small leaves. In this case,  
259 the strong, positive relationship between  $\delta^{13}\text{C}_{\text{leaf}}$  and transpiration would be driven by  
260 increased leaf area in the large plants. However,  $\text{C}_4$  photosynthesis is mostly  $\text{CO}_2$   
261 saturated at ambient  $\text{CO}_2$  concentrations, so variation in  $TE_i$  is likely due to variation in  
262  $g_s$  across genotypes such that  $T$  decreases without negative impacts on  $A_{\text{net}}$ . This is  
263 further supported from studies of  $\text{C}_3$  species that showed that  $g_s$  and not  $A_{\text{net}}$  varied  
264 with  $TE_i$  and  $\delta^{13}\text{C}_{\text{leaf}}$  (67-70).

265 For  $\delta^{13}\text{C}_{\text{leaf}}$  to be an effective screen for  $TE_i$  and  $\text{WUE}_{\text{plant}}$  of a  $\text{C}_4$  species, it must  
266 show genotypic variation, be responsive to environmental conditions that influence  $TE_i$ ,  
267 and be physiologically related to  $\text{WUE}_{\text{plant}}$ . In this  $\text{C}_4$  grass RIL population,  $\delta^{13}\text{C}_{\text{leaf}}$   
268 showed significant and consistent response to water limitation, significant genotypic  
269 variation, and high heritability. Additionally,  $\delta^{13}\text{C}_{\text{leaf}}$  correlated with transpiration,  
270 biomass, and the linear relationship between biomass and transpiration ( $\text{WUE}_{\text{fit}}$ ),  
271 suggesting a physiological relationship among these traits. This is further supported by  
272 the fact that  $\delta^{13}\text{C}_{\text{leaf}}$  and  $\text{WUE}_{\text{plant}}$  had a strong negative correlation within the allele  
273 classes defined by  $\delta^{13}\text{C}_{\text{leaf}}$ .

274 Both  $\text{WUE}_{\text{plant}}$  and  $\text{WUE}_{\text{fit}}$  are driven by a balance between the intrinsic  
275 relationship between carbon assimilation and water lost via stomates ( $TE_i$ ) and other  
276 whole plant processes such as  $\phi_c$ ,  $\phi_w$ , and  $r$  (when only aboveground biomass is  
277 measured). Hence, the relationship between  $\delta^{13}\text{C}_{\text{leaf}}$  and  $\text{WUE}_{\text{plant}}$  is only apparent if  $TE_i$   
278 has a strong influence on  $\text{WUE}_{\text{plant}}$ . Nevertheless,  $\delta^{13}\text{C}_{\text{leaf}}$  can be used to detect variation  
279 in  $TE_i$  that is not apparent from measuring  $\text{WUE}_{\text{plant}}$  only. Therefore, this study  
280 advances our understanding of  $\text{WUE}_{\text{plant}}$ ,  $TE_i$ , and  $\delta^{13}\text{C}_{\text{leaf}}$  in a  $\text{C}_4$  species. Furthermore, it  
281 illustrates that  $\delta^{13}\text{C}_{\text{leaf}}$  has potential to be used in screening for  $TE_i$  in marker-assisted  $\text{C}_4$   
282 plant breeding and to better understand the genetic controls of  $\text{WUE}_{\text{plant}}$  and its  
283 components. Additional work is needed to explore the use of  $\delta^{13}\text{C}_{\text{leaf}}$  in other  $\text{C}_4$  species  
284 and under field settings to better understand the complex interaction of traits and  
285 causal genes that influence  $\text{WUE}_{\text{plant}}$ ,  $TE_i$ , and  $\delta^{13}\text{C}_{\text{leaf}}$ .

## 286 **Methods**

### 287 *Plant material and growth conditions*

288 An interspecific *Setaria* F7 recombinant inbred line (RIL) population comprised of  
289 189 genotypes was previously generated through a cross between the wild-type green  
290 foxtail *S. viridis* accession, A10, and the domesticated *S. italica* foxtail millet accession,  
291 B100 (60, 61, 71). Seeds from this population were sowed in 10 cm diameter white pots  
292 pre-filled with ~470 cm<sup>3</sup> of Metro-Mix 360 soil (Hummert, USA) and 0.5 g of Osmocote  
293 Classic 14-14-14 fertilizer (Everris, USA) and placed on the Bellwether Phenotyping  
294 System using a random block design. Two to three replicates per genotype, including  
295 the A10 and B10 parental accessions, per treatment (1138 individuals) were grown for  
296 25 days with a photoperiod of 16 h light / 8 h night, light intensity of 500  $\mu\text{mol}/\text{m}^2/\text{s}$ , a  
297 temperature regime of 31°C day/21°C night and relative humidity was maintained  
298 between 40 – 80 %. Plants were watered 2-3 times per day to maintain plants at 100 %  
299 pot capacity (PC) in the well-watered treatment and at 40% PC in the water-limited  
300 treatment as determined by Fahlgren, *et al.* (41). Prescribed soil water content across  
301 both treatment blocks was achieved by 15 days after planting. Additional detail on the  
302 experimental design and plant growth can be found in Feldman, *et al.* (42), Feldman, *et*  
303 *al.* (66).

### 304 *Measurements of biomass and transpiration*

305 The volume of water transpired by individual plants at each pot weighing was  
306 calculated as the difference between the measured pot weight and the weight of the pre-  
307 filled pot at pot capacity (100% PC for the well-watered treatment) or the difference  
308 between current pot weight and the weight measurement on the previous day if no  
309 water was added. The pots were watered to return the pot weight to the pre-set pot  
310 weight, which maintains the gravimetric water content at either 100 % or 40 % PC for  
311 the well-watered or water-limited treatment blocks, respectively. Initially all seedlings  
312 were watered to pot capacity for the first two days on the Bellwether system. After two  
313 days, the potting medium in the water-limited treatment was allowed to dry down to 40  
314 % of PC, then maintained at the water content level of 40 %.

315 Plants were imaged every other day to measure side view area, which was used  
316 to calculate fresh biomass (41, 42). The relationship between side view area and fresh  
317 biomass was developed based on the final aboveground biomass and the last imaging  
318 before harvesting. The sensitivity of the measurements limited reliable measurements of

319 plant size and transpiration from day 17 to 33 when plants were not too small for image  
320 analysis and measurements of transpiration (42). Water use efficiency ( $WUE_{ratio}$ ) was  
321 calculated as the ratio of aboveground biomass and total water transpired. Instead of  
322 comparing  $\delta^{13}C_{leaf}$  to each day, the midpoint of the experiment was chosen (day 25) to  
323 conduct the analysis. The plants on day 25 were in vegetative phase and growing  
324 rapidly, typical of when physiological and gas exchange measurements would be made.  
325 Additionally, day 25 was representative in terms of QTL and other analyses conducted  
326 throughout the experiment (42).

327 In this population, plant size and cumulative whole-plant transpiration were  
328 strongly correlated (42), so an ordinary least squares linear regression was used within  
329 treatment blocks to model this relationship (Fig. S3). The within treatment model was  
330 used to predict the accumulation of fresh biomass based on the amount of water  
331 transpired ( $WUE_{fit}$ ). The residuals surrounding  $WUE_{fit}$  ( $WUE_{res}$ ) represent the fresh  
332 biomass of individual plants not explained by  $WUE_{fit}$  (42).

### 333 *Leaf carbon stable isotopic composition ( $\delta^{13}C_{leaf}$ )*

334 The youngest, fully expanded leaf was collected during the final harvest at the  
335 end of the experiment (day 34) and dried at 55 °C for three days. Once the leaves were  
336 dried, 8-12 discs, having a total leaf area of 0.47 – 0.71 cm<sup>2</sup>, were sampled from each leaf  
337 and placed in tin capsules for stable isotopic analysis. A comparison of  $\delta^{13}C_{leaf}$  from  
338 sampling leaf discs to grinding and sampling an aliquot of the completely homogenized  
339 powered leaf tissue was made on a subset of 47 leaves. The slope of  $\delta^{13}C_{leaf}$  from the  
340 punches regressed against  $\delta^{13}C_{leaf}$  from the ground leaf tissue was  $0.93 \pm 0.03$  ( $R^2 = 0.96$ ;  
341 Fig. S4) and the mean difference between methods was  $0.06 \pm 0.04$  ‰, which was  
342 similar to the IRMS precision and significantly less than the sample standard deviation  
343 of 0.5 ‰. Considering the similarity between sampling methods, all leaves were  
344 sampled using the more rapid hole punching method.

345 Leaf tissue was converted to CO<sub>2</sub> with an elemental analyzer (ECS 4010, Costech  
346 Analytical, Valencia, CA) and analyzed with a continuous flow isotope ratio mass  
347 spectrometer (Delta PlusXP, ThermoFinnigan, Bremen; (72, 73). The Santrock correction  
348 was used by the IRMS software to correct for <sup>17</sup>O (74). Final  $\delta$  values were the mean of 5  
349 sample peaks calibrated to the international standards NBS 19, RM 8542, and IAEA-CO-  
350 9 to calculate  $\delta^{13}C$  relative to Vienna Pee Dee belemnite (V-PDB). Quality control

351 standards were also included to determine the correction quality. Overall standard  
352 deviation for  $\delta^{13}\text{C}$  values was 0.07 ‰.

353 The stable isotope composition of carbon ( $\delta^{13}\text{C}_{\text{leaf}}$ ) was reported in  $\delta$  notation in  
354 parts per thousand (‰),

$$\delta = \left( \frac{R_{\text{sample}}}{R_{\text{standard}}} - 1 \right) \quad \text{Equation 1}$$

355 where  $R_{\text{sample}}$  and  $R_{\text{standard}}$  is the molar ratios of heavy to light isotope ( $^{13}\text{C}/^{12}\text{C}$ ) of the  
356 sample and international standard, respectively. The international standard used for  
357 oxygen was Vienna- PeeDee Belemite (VPDB).

### 358 *Statistical analysis*

359 Statistical analyses were conducted in R version 3.4.0 (R Team 75), using car  
360 (version 2.0-26) packages for statistical tests and lmodel2 (version 1.7-2) package for  
361 Model II regression analysis (standard major axis). Model II regressions were calculated  
362 because neither variable was controlled, both varied naturally with their own associated  
363 error, and the physical units of both variables were not the same. Homogeneity was  
364 tested based on plotting predicted fit versus residuals. Using the extRemes package  
365 (version 2.0-8), normality was tested by plotting residuals on quantiles-quantiles plots.  
366 Within treatment comparisons were made on each trait using a two-factor analysis of  
367 variance (ANOVA) where the factors were treatment and genotype. Slope of the  
368 relationship between fresh biomass and transpiration was calculated with Model II  
369 linear regression and determined to be different using analysis of co-variance  
370 (ANCOVA). Methods used in QTL analysis were explained in Feldman, *et al.* (42),  
371 Feldman, *et al.* (66).

### 372 **Acknowledgements**

373 This work was supported by the Office of Biological and Environmental Research in the  
374 DOE Office of Science (DE-SC0008769).

375

## Appendix I: Glossary of terms

---

| Term                                   | Definition                                                                                                                                            |
|----------------------------------------|-------------------------------------------------------------------------------------------------------------------------------------------------------|
| $\Delta^{13}\text{C}$                  | Photosynthetic carbon discrimination ( $\delta^{13}\text{C}_{\text{ambient}} - \delta^{13}\text{C}_{\text{leaf}}$ )                                   |
| $\delta^{13}\text{C}_{\text{leaf}}$    | Leaf carbon isotopic composition (‰)                                                                                                                  |
| $\delta^{13}\text{C}_{\text{ambient}}$ | Isotopic composition of ambient $\text{CO}_2$ (‰)                                                                                                     |
| $\text{WUE}_{\text{ag}}$               | Agricultural water use efficiency (crop yield/water applied to crop)                                                                                  |
| $\text{WUE}_{\text{plant}}$            | Total biomass/water transpired                                                                                                                        |
| $\text{WUE}_{\text{biomass}}$          | Theoretical ratio of aboveground biomass and water transpired                                                                                         |
| $\text{WUE}_{\text{ratio}}$            | Measured ratio of aboveground biomass and water transpired                                                                                            |
| $\text{WUE}_{\text{fit}}$              | Linear model fit of biomass regressed on transpiration                                                                                                |
| $\text{WUE}_{\text{res}}$              | Residuals of the linear model between biomass and transpiration                                                                                       |
| $\text{TE}_i$                          | Intrinsic transpiration efficiency ( $A_{\text{net}}/g_s$ )                                                                                           |
| HI                                     | Harvestable index                                                                                                                                     |
| $C_i/C_a$                              | Intercellular to ambient $\text{CO}_2$ concentration                                                                                                  |
| $g_s$                                  | Stomatal conductance                                                                                                                                  |
| $A_{\text{net}}$                       | Net photosynthetic rate                                                                                                                               |
| $T$                                    | Transpiration rate                                                                                                                                    |
| ET                                     | Evapotranspiration                                                                                                                                    |
| $v$                                    | Evaporative demand; ( $e_i - e_a$ )                                                                                                                   |
| $e_i - e_a$                            | Water vapor molar difference between intercellular and ambient air at leaf temperature                                                                |
| $\phi_w$                               | Proportion of water used by plant that is unproductive water loss (e.g. nighttime and cuticular transpiration)                                        |
| $\phi_c$                               | Proportion of fixed carbon lost through respiration                                                                                                   |
| $r$                                    | Proportion of biomass                                                                                                                                 |
| $a$                                    | Fractionation during diffusion of $\text{CO}_2$ in air through stomata (4.4 ‰)                                                                        |
| $b_3$                                  | Fractionation by Rubisco (30 ‰)                                                                                                                       |
| $b_4$                                  | Fractionation of PEP carboxylation and isotopic equilibrium during dissolution and hydration of $\text{CO}_2$ (-5.2 ‰ at a leaf temperature of 30 °C) |
| $s$                                    | Fractionation during the $\text{CO}_2$ leakage from the bundle sheath cells (1.8 ‰)                                                                   |
| $\phi$                                 | Leakiness of $\text{CO}_2$ from the bundle sheath                                                                                                     |
| $H^2$                                  | Broad sense heritability                                                                                                                              |

---

## Appendix II. Theory

Agricultural water use efficiency ( $WUE_{ag}$ ) can be defined as the crop yield per unit water supplied to the crop system. Therefore, yield relative to water use can be calculated as a function of evapotranspiration ( $ET$ ), the proportion of  $ET$  that is transpired ( $T/ET$ ),  $WUE_{plant}$ , and the harvest index (harvested proportion of biomass; Equation 1; 2, 15) as

$$Yield = ET \times \frac{T}{ET} \times WUE_{plant} \times HI. \quad \text{Equation S1}$$

Where  $WUE_{plant}$  relates to net  $CO_2$  assimilation rates ( $A_{net}$ ) relative to transpiration rate ( $T$ ) at the whole plant level, and accounts for the proportion of fixed carbon lost by whole plant respiration ( $\phi_c$ ) and the proportion of "unproductive" water loss ( $\phi_w$ ) such as nighttime transpiration or cuticular evaporation (Equation 2; 11, 76). The relationship of these parameters to  $WUE_{plant}$  can be defined as

$$WUE_{plant} = \frac{A_{net}(1 - \phi_c)}{T(1 + \phi_w)} \quad \text{Equation S2}$$

where  $A_{net}$  and  $T$  are related through stomatal conductance ( $g_s$ ) as

$$A_{net} = g_{sCO_2}(C_a - C_i) \quad \text{Equation S3}$$

and

$$T = g_{sH_2O}(e_i - e_a). \quad \text{Equation S4}$$

The parameter  $(e_i - e_a)$  is the water vapor molar difference between intercellular and ambient air at leaf temperature,  $(C_a - C_i)$  is the  $CO_2$  molar difference between intercellular and ambient  $CO_2$ , and  $g_{sCO_2}$  and  $g_{sH_2O}$  are the conductance values for  $CO_2$  and  $H_2O$ , respectively (10-12). Substituting Eqs 3 and 4 into Eq 2 gives

$$WUE_{plant} = \frac{g_{sCO_2}(C_a - C_i)(1 - \phi_c)}{g_{sH_2O}(e_i - e_a)(1 + \phi_w)} = \frac{C_a \left(1 - \frac{C_i}{C_a}\right) (1 - \phi_c)}{1.6v(1 + \phi_w)} \quad \text{Equation S5}$$



where  $v$  is the evaporative demand ( $e_i - e_a$ ), and the ratio of diffusivities of H<sub>2</sub>O and CO<sub>2</sub> in air is 1.6. The molar ratio of intercellular to ambient CO<sub>2</sub> ( $C_i/C_a$ ) influences  $WUE_{plant}$  because it represents the relative drawdown of intercellular CO<sub>2</sub> ( $C_i$ ) by photosynthesis and the conductance of CO<sub>2</sub> into the leaf and the conductance of water vapor out the leaf via the stomata. Intrinsic TE ( $A_{net}/g_s$ ;  $TE_i$ ) is equal to the CO<sub>2</sub> gradient from ambient to intercellular spaces ( $C_i - C_a$ ), which can be rewritten as  $TE_i = C_a(1 - C_i/C_a)$ .

Therefore, Eq 5 can be simplified as a function of  $TE_i$  as

$$WUE_{plant} = \frac{TE_i(1 - \phi_c)}{1.6v(1 + \phi_w)} \quad \text{Equation S6}$$

When WUE is calculated with respect to aboveground biomass ( $WUE_{biomass}$ ) as is the case with a bioenergy crop, biomass yield excludes the root fraction ( $r$ ) and  $WUE_{biomass}$  can be defined as

$$WUE_{biomass} = \frac{TE_i(1 - \phi_c)(1 - r)}{1.6v(1 + \phi_w)} \quad \text{Equation S7}$$

The relationship between  $\delta^{13}C_{leaf}$  and  $TE_i$  is based on 1) variation in  $\delta^{13}C_{leaf}$  (‰) of plants grown in the same atmospheric conditions is primarily controlled by leaf CO<sub>2</sub> isotope discrimination ( $\Delta^{13}C$ ), 2)  $\Delta^{13}C$  is influenced by changes in  $C_i/C_a$  and 3)  $C_i/C_a$ , as stated above, is affected by the interrelationship  $A_{net}$  and  $g_s$ . Therefore,  $TE_i$  ( $A_{net}/g_s$ ) is related to  $C_i/C_a$  and, in turn,  $\Delta^{13}C$  (10, 27).

Finally, leaf carbon composition ( $\delta^{13}C$ ) is related to  $\Delta^{13}C$  as

$$\Delta^{13}C = \frac{\delta^{13}C_{ambient} - \delta^{13}C_{leaf}}{1 + \delta^{13}C_{leaf}/1000} \quad \text{Equation S8}$$

where,  $\delta^{13}C_{ambient}$  is the CO<sub>2</sub> isotopic signature of the CO<sub>2</sub> in the air surrounding the leaf, and  $\delta^{13}C_{leaf}$  is the leaf carbon isotopic composition (20). In C<sub>4</sub> species,  $\Delta^{13}C$  is primarily determined by fractionations associated with CO<sub>2</sub> carboxylation and diffusion, the ratio of bundle sheath CO<sub>2</sub> leak rate to PEP carboxylase rate (leakiness;  $\phi$ ), and  $C_i/C_a$  (Equation 9). Leakiness ( $\phi$ ) determines the slope of the relationship between  $\Delta^{13}C$  and  $C_i/C_a$  and has been shown to be relatively constant in many C<sub>4</sub> species across light intensities, temperatures, and CO<sub>2</sub> partial pressures (77-80). Based on this mathematical

relationship, if  $\phi$  is less than 0.37, then  $\Delta^{13}\text{C}$  increases as  $C_i/C_a$  decreases, which corresponds with increasing  $\delta^{13}\text{C}_{\text{leaf}}$ . If  $\phi$  is greater than 0.37, then the relationship reverses where  $\Delta^{13}\text{C}$  increases with  $C_i/C_a$ . In *Setaria*,  $\phi$  has been found to be less than 0.37, so  $C_i/C_a$  is expected to form a negative relationship with  $\Delta^{13}\text{C}$  and positive relationship with  $\delta^{13}\text{C}_{\text{leaf}}$  (Ellsworth et al. unpublished; 81). The relationship of  $\Delta^{13}\text{C}$  and  $C_i/C_a$  can be defined by the simplified relationship as originally described by Farquhar (1984) as

$$\Delta^{13}\text{C} = a + (b_4 + \phi(b_3 - s) - a) \frac{C_i}{C_a} \quad \text{Equation S9}$$

where  $a$  is the fractionation during diffusion of  $\text{CO}_2$  in air through stomata (4.4 ‰),  $b_4$  is the fractionations of PEP carboxylation and the preceding isotopic equilibrium during dissolution and hydration of  $\text{CO}_2$  (-5.7 ‰ at a leaf temperature of 25 °C) as described in (82, 83),  $b_3$  is the Rubisco fractionation (29 ‰), and  $s$  is the fractionation during the leakage of  $\text{CO}_2$  out of the bundle sheath cells (1.8 ‰) (27, 82).

Table 1: Analysis of variance of traits. Means  $\pm$  SD of fresh biomass, transpiration,  $WUE_{ratio}$ ,  $WUE_{fit}$ , and  $WUE_{res}$  were determined on day 25.  $\delta^{13}C_{leaf}$  was collected at the end of the experiment on day 34.

| Trait                 | Treatment block   |                   | Treatment              |         | Genotype                 |         | Treatment $\times$ Genotype |         |
|-----------------------|-------------------|-------------------|------------------------|---------|--------------------------|---------|-----------------------------|---------|
|                       | Well-watered      | Water-limited     | $F_{ddf,ndf}$          | $P$     | $F_{ddf,ndf}$            | $P$     | $F_{ddf,ndf}$               | $P$     |
| Fresh biomass (g)     | 14.87 $\pm$ 6.78  | 5.29 $\pm$ 2.04   | 4248 <sub>1,744</sub>  | <0.0001 | 14.83 <sub>188,744</sub> | <0.0001 | 6.11 <sub>182,744</sub>     | <0.0001 |
| Transpiration (ml)    | 765.4 $\pm$ 60.1  | 268.7 $\pm$ 193.4 | 8395 <sub>1,764</sub>  | <0.0001 | 7.432 <sub>189,764</sub> | <0.0001 | 3.321 <sub>183,764</sub>    | <0.0001 |
| $WUE_{ratio}$ (g/L)   | 19.7 $\pm$ 5.0    | 24.5 $\pm$ 5.0    | 515.8 <sub>1,744</sub> | <0.0001 | 6.613 <sub>188,744</sub> | <0.0001 | 1.063 <sub>182,744</sub>    | 0.29    |
| $WUE_{fit}$ (g)       | 14.87 $\pm$ 6.12  | 5.29 $\pm$ 1.54   | 3299 <sub>1,744</sub>  | <0.0001 | 7.441 <sub>188,744</sub> | <0.0001 | 3.942 <sub>182,744</sub>    | <0.0001 |
| $WUE_{res}$ (g)       | -1.85 $\pm$ 2.93  | -1.85 $\pm$ 1.34  | 0 <sub>1,744</sub>     | 1.00    | 2.785 <sub>188,744</sub> | <0.0001 | 0.97 <sub>182,744</sub>     | 0.59    |
| $\delta^{13}C_{leaf}$ | -13.50 $\pm$ 0.50 | -14.33 $\pm$ 0.55 | 569 <sub>1,351</sub>   | <0.0001 | 2.054 <sub>184,351</sub> | <0.0001 | 1.003 <sub>175,351</sub>    | 0.49    |

Table 2: Broad-sense heritability ( $H^2$ ) and proportional variance of traits on day 25 after sowing.  $\delta^{13}\text{C}_{\text{leaf}}$  was collected at the end of the experiment.

| Trait                               | Proportional variance |           |               | $H^2$           |                        |                         |
|-------------------------------------|-----------------------|-----------|---------------|-----------------|------------------------|-------------------------|
|                                     | Genotype              | Treatment | G x Treatment | Both treatments | Well-watered treatment | Water-limited treatment |
| Fresh biomass                       | 0.13                  | 0.64      | 0.14          | 0.60            | 0.77                   | 0.65                    |
| Transpiration                       | 0.04                  | 0.86      | 0.04          | 0.56            | 0.61                   | 0.34                    |
| $\text{WUE}_{\text{ratio}}$         | 0.34                  | 0.32      | 0.01          | 0.83            | 0.62                   | 0.37                    |
| $\text{WUE}_{\text{fit}}$           | 0.07                  | 0.69      | 0.11          | 0.48            | 0.63                   | 0.33                    |
| $\text{WUE}_{\text{res}}$           | 0.24                  | 0.0       | 0.0           | 0.62            | 0.23                   | 0.27                    |
| $\delta^{13}\text{C}_{\text{leaf}}$ | 0.09                  | 0.55      | 0.01          | 0.45            | 0.49                   | 0.04                    |

Table 3. QTL found across all traits in both treatments. Filled cells represent QTL, and the number in the cell is the proportion of additive variance explained (%) by the QTL, which can have a positive or negative effect on the trait.

| Trait                 | Treatment     | Genomic position of QTL |      |        |      |       |        |       |       |
|-----------------------|---------------|-------------------------|------|--------|------|-------|--------|-------|-------|
|                       |               | 2@96                    | 3@48 | 5@109  | 6@61 | 7@51  | 7@99   | 9@34  | 9@126 |
| Fresh biomass         | well-watered  | 15.47                   | 5.5  | -6.22  | 4.8  |       | -8.24  | 11.88 |       |
|                       | water-limited | 10.3                    |      | -8.52  |      |       | -5.19  | 20.37 | 9.5   |
| Transpiration         | well-watered  | 13.45                   |      | -9.92  | 4.8  | -5.14 | -10.54 | 16.49 |       |
|                       | water-limited | 8.15                    |      |        |      |       | -11.54 | 21.84 |       |
| WUE <sub>fit</sub>    | well-watered  | 13.45                   |      | -9.92  |      | -5.14 | -10.53 | 16.49 |       |
|                       | water-limited | 8.15                    |      |        |      |       | -11.54 | 21.84 |       |
| $\delta^{13}\text{C}$ | well-watered  |                         |      |        |      | -6.49 | -8.2   | 14.52 |       |
|                       | water-limited |                         |      |        |      |       |        |       |       |
| WUE <sub>ratio</sub>  | well-watered  | 20.27                   |      | -10.67 |      |       |        | 6.45  |       |
|                       | water-limited | 13.56                   |      | -11.77 |      |       |        | 9.15  | 7.50  |
| WUE <sub>res</sub>    | well-watered  | 7.96                    |      | -13.55 |      |       |        |       |       |
|                       | water-limited | 11.01                   |      | -22.72 |      |       |        |       |       |

Table 4:  $\delta^{13}\text{C}_{\text{leaf}}$  and the regression slope of the relationship between fresh biomass and transpiration at the allele class level. The slopes are Model II regression (standard major axis). The allele class 'ABA' was not present in this RIL population. These slopes  $\pm$  SEM are from the relationship found in figure 3A and are also plotted against  $\delta^{13}\text{C}_{\text{leaf}} \pm$  SEM in figure 3B.

| Allele class | Well-watered treatment        |                |          |                                     | Water-limited treatment |                |          |                                     |
|--------------|-------------------------------|----------------|----------|-------------------------------------|-------------------------|----------------|----------|-------------------------------------|
|              | Slope                         | R <sup>2</sup> | P        | $\delta^{13}\text{C}_{\text{leaf}}$ | Slope                   | R <sup>2</sup> | P        | $\delta^{13}\text{C}_{\text{leaf}}$ |
| AAA          | 36.8 $\pm$ 3.7                | 0.85           | < 0.0001 | -13.7 $\pm$ 0.08                    | 45.4 $\pm$ 3.9          | 0.87           | < 0.0001 | -14.36 $\pm$ 0.07                   |
| AAB          | 35.1 $\pm$ 2.3                | 0.78           | < 0.0001 | -13.15 $\pm$ 0.04                   | 35.7 $\pm$ 3.2          | 0.59           | < 0.0001 | -14.28 $\pm$ 0.05                   |
| ABA          | Not present in RIL population |                |          |                                     |                         |                |          |                                     |
| ABB          | 38.4 $\pm$ 15.9               | 0.49           | 0.19     | -13.8 $\pm$ 0.07                    | 31.1 $\pm$ 16.5         | 0.16           | 0.51     | -14.24 $\pm$ 0.16                   |
| BBB          | 61.1 $\pm$ 6.6                | 0.91           | < 0.0001 | -13.91 $\pm$ 0.07                   | 53.1 $\pm$ 9.2          | 0.59           | 0.009    | -14.42 $\pm$ .13                    |
| BBA          | 56.7 $\pm$ 11.2               | 0.81           | 0.006    | -14.0 $\pm$ 0.09                    | 62.7 $\pm$ 8.8          | 0.90           | 0.001    | -14.60 $\pm$ 0.10                   |
| BAB          | 35.1 $\pm$ 1.7                | 0.86           | < 0.0001 | -13.44 $\pm$ 0.04                   | 39.6 $\pm$ 2.5          | 0.76           | < 0.0001 | -14.23 $\pm$ 0.05                   |
| BAA          | 47.9 $\pm$ 4.0                | 0.86           | < 0.0001 | -13.79 $\pm$ 0.09                   | 42.6 $\pm$ 7.8          | 0.32           | 0.006    | -14.43 $\pm$ 0.08                   |



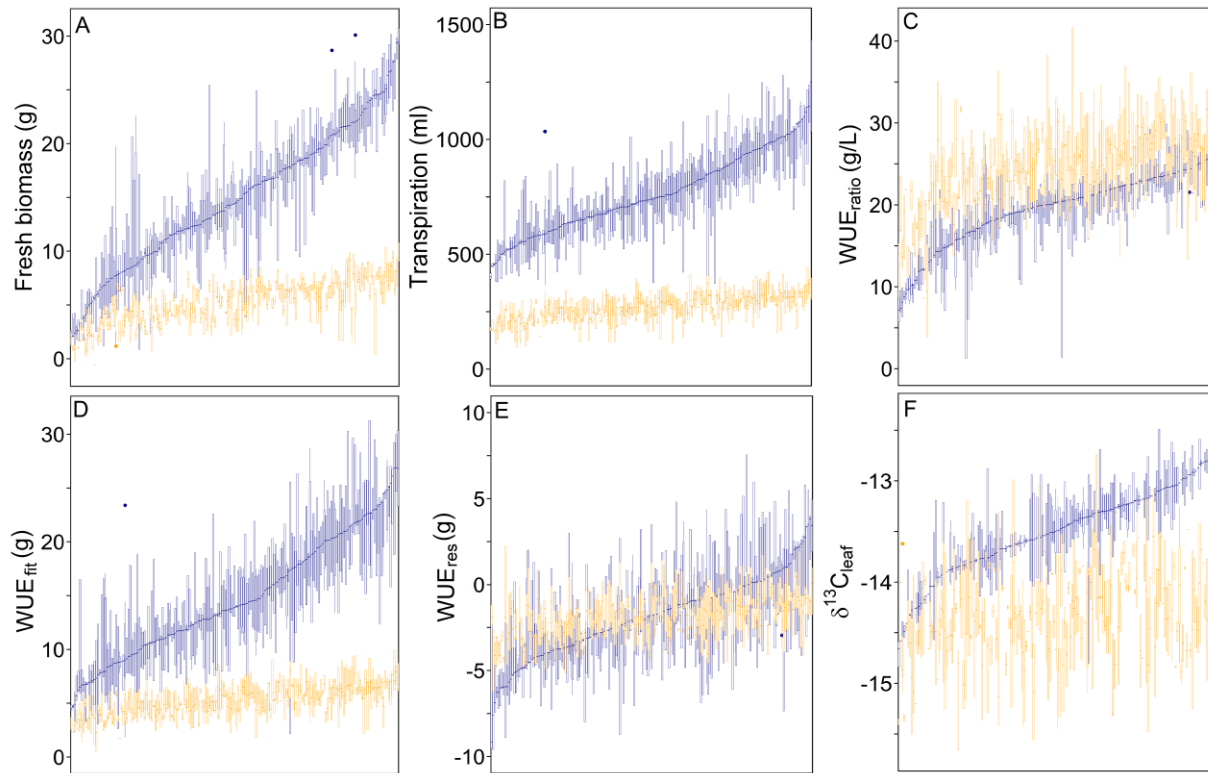Correlation with  $\delta^{13}\text{C}_{\text{leaf}}$  (r)

| Treatment       | Fresh biomass | Transpiration | $\text{WUE}_{\text{ratio}}$ | $\text{WUE}_{\text{fit}}$ | $\text{WUE}_{\text{res}}$ |
|-----------------|---------------|---------------|-----------------------------|---------------------------|---------------------------|
| Well-watered    | 0.30          | 0.33          | 0.20                        | 0.33                      | -0.03                     |
| Water-limited   | -0.05         | -0.05         | -0.06                       | -0.05                     | -0.01                     |
| Both treatments | 0.51          | 0.60          | -0.19                       | 0.55                      | -0.12                     |

Figure 1. Ordered boxplots of fresh biomass (A), transpiration (B),  $\text{WUE}_{\text{ratio}}$  (C),  $\text{WUE}_{\text{fit}}$  (D),  $\text{WUE}_{\text{res}}$  (E), and  $\delta^{13}\text{C}_{\text{leaf}}$  (F). All traits were measured on day 25 at peak growth, except  $\delta^{13}\text{C}_{\text{leaf}}$ , which  $\delta^{13}\text{C}_{\text{leaf}}$  measured on leaves collected at the end of the experiment on day 34. Treatment effect was significant for all traits except  $\text{WUE}_{\text{res}}$ . The table below shows the correlation coefficients of each trait with  $\delta^{13}\text{C}_{\text{leaf}}$ .

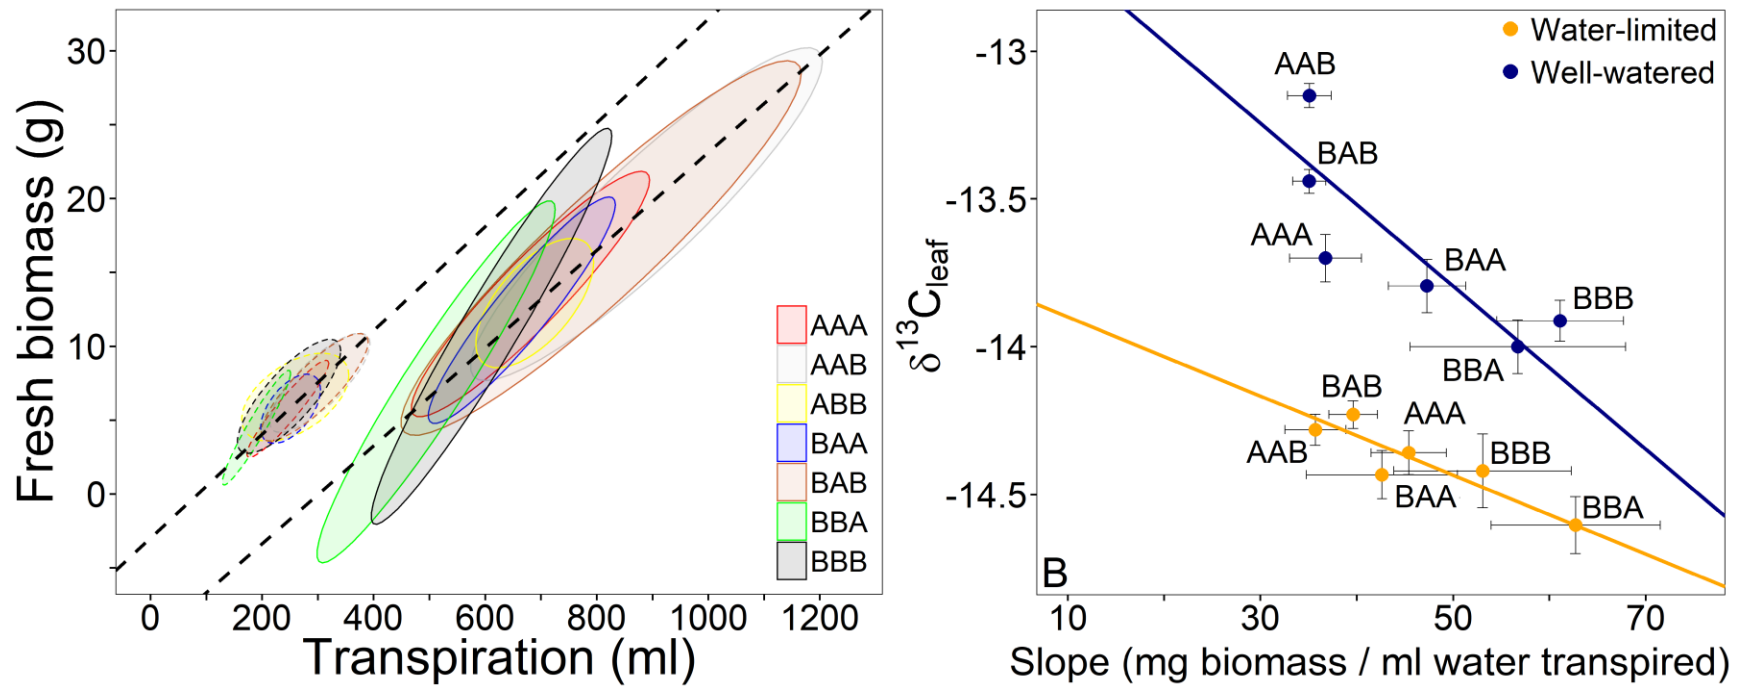

Figure 2. The effect of allele class on fresh biomass, transpiration and  $\delta^{13}\text{C}_{\text{leaf}}$ . In panel A, QTL 7@51, 7@99, and 9@34 were combined to produce seven allele classes where the first letter represents the allele at QTL 7@51, the second letter represents the allele at QTL 7@99, and the third letter represents the allele at QTL 9@34. The letter 'A' represents the allele from the A10 parental accession (*Setaria viridis*), and 'B' represents the allele from the B100 parental accession (*Setaria italica*). Ellipses represent 95 % confidence intervals for the relationship of fresh biomass and transpiration, and the slope of this relationship for each allele class was significant, except for allele class 'ABB' ( $P < 0.0001$ ). In panel B,  $\delta^{13}\text{C}_{\text{leaf}} \pm \text{SEM}$  is regressed against the slope of relationship  $\pm \text{SE}$  in panel A, excluding the non-significant slope for 'ABB'. The slope is the water use efficiency for an entire allele class. The regression for  $\delta^{13}\text{C}_{\text{leaf}}$  versus slope was significant in the well-watered ( $\delta^{13}\text{C}_{\text{leaf}} = -0.027 \text{ slope} - 12.48$ ;  $R^2 = 0.71$ ;  $P < 0.05$ ) and in the water-limited treatments ( $\delta^{13}\text{C}_{\text{leaf}} = -0.012 \text{ slope} - 13.82$ ;  $R^2 = 0.80$ ,  $P < 0.05$ ).

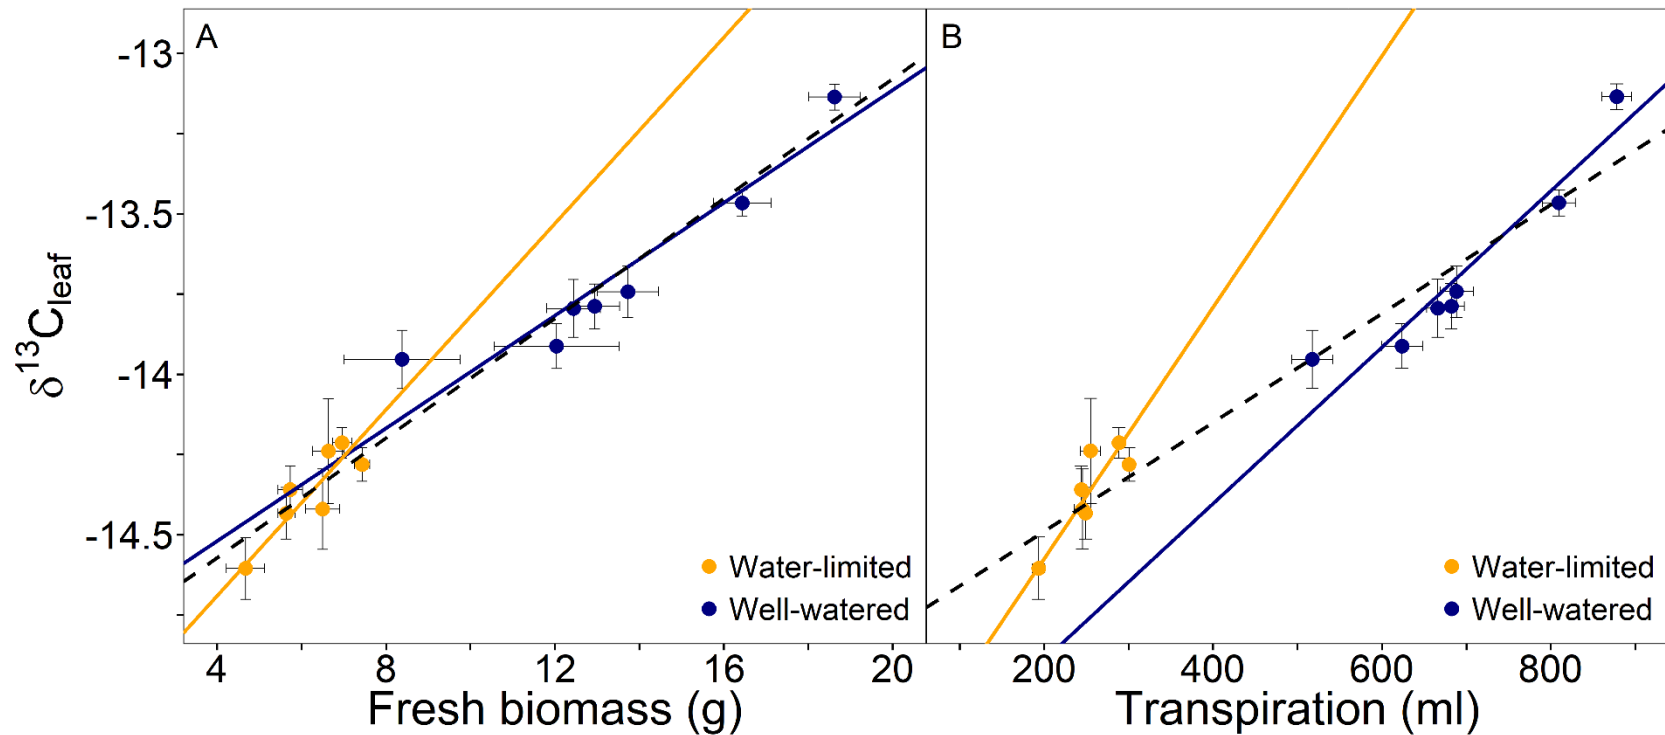

Figure 3. The effect of allele class on the relationship of fresh biomass and transpiration with  $\delta^{13}\text{C}_{\text{leaf}}$ . Like in Fig. 2, QTL 7@51, 7@99 and 9@34 were combined to produce seven allele classes. In panel A, the mean  $\delta^{13}\text{C}_{\text{leaf}}$  was regressed against fresh biomass for both treatments separately and both combined ( $\delta^{13}\text{C}_{\text{leaf}} = 0.088$  fresh biomass  $- 14.87$ ;  $R^2 = 0.88$ ;  $P = 0.002$  for well-watered;  $\delta^{13}\text{C}_{\text{leaf}} = 0.145$  fresh biomass  $- 15.14$ ;  $R^2 = 0.75$ ;  $P = 0.01$  for water-limited;  $\delta^{13}\text{C}_{\text{leaf}} = 0.093$  fresh biomass  $- 14.94$ ;  $R^2 = 0.95$ ;  $P < 0.0001$  for both treatments). In panel B,  $\delta^{13}\text{C}_{\text{leaf}}$  is regressed against transpiration for both treatments and both treatments combined ( $\delta^{13}\text{C}_{\text{leaf}} = 0.0024$  transpiration  $- 15.38$ ;  $R^2 = 0.90$ ;  $P = 0.001$  for well-watered;  $\delta^{13}\text{C}_{\text{leaf}} = 0.0039$  transpiration  $- 15.36$ ;  $R^2 = 0.75$ ;  $P = 0.01$  for water-limited;  $\delta^{13}\text{C}_{\text{leaf}} = 0.0017$  transpiration  $- 14.83$ ;  $R^2 = 0.93$ ;  $P < 0.0001$  for both treatments). Regression of both treatments together is identified by black, dashed line.

## Supplemental Figures

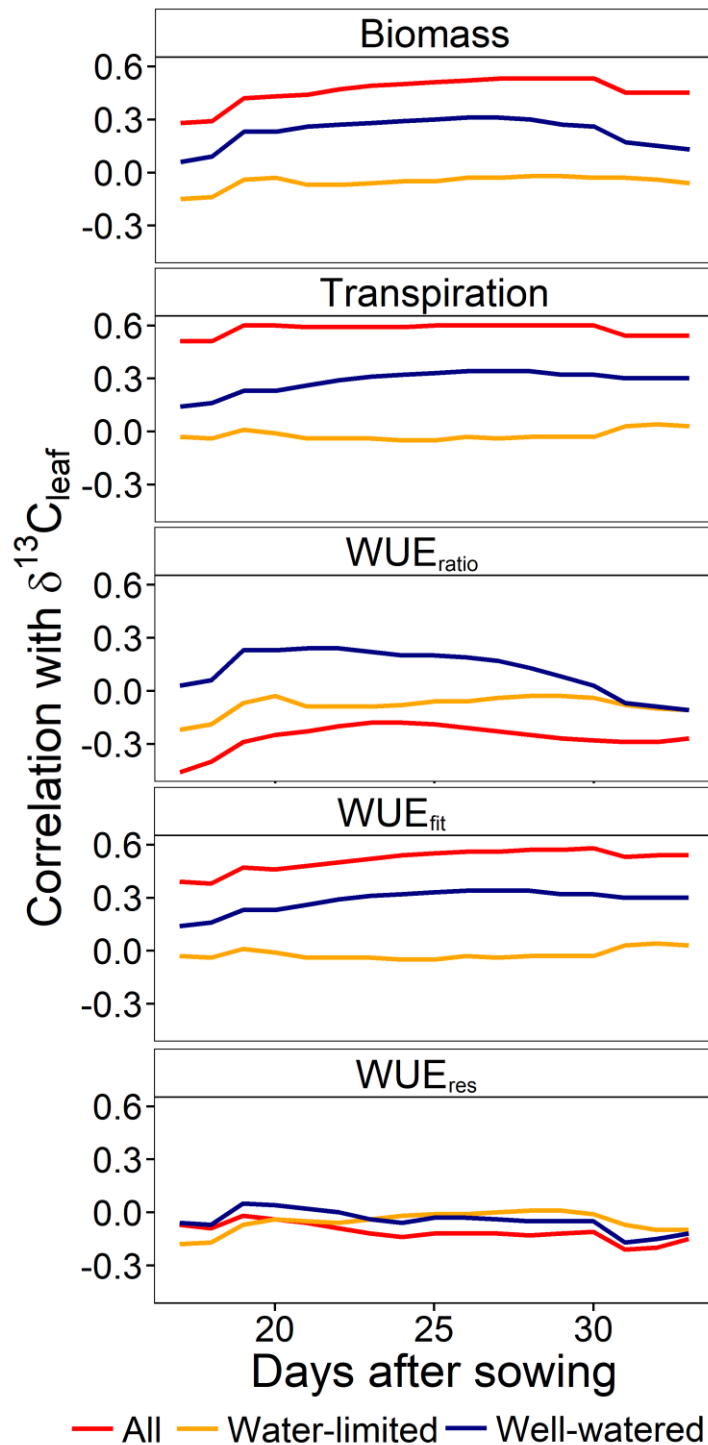

Figure S1. Correlation of fresh biomass, transpiration,  $WUE_{ratio}$ ,  $WUE_{fit}$ , and  $WUE_{res}$  with  $\delta^{13}C_{leaf}$  through the course of the experiment. Fresh biomass, transpiration,  $WUE_{fit}$ , and  $WUE_{res}$  were from Feldman, *et al.* (42).

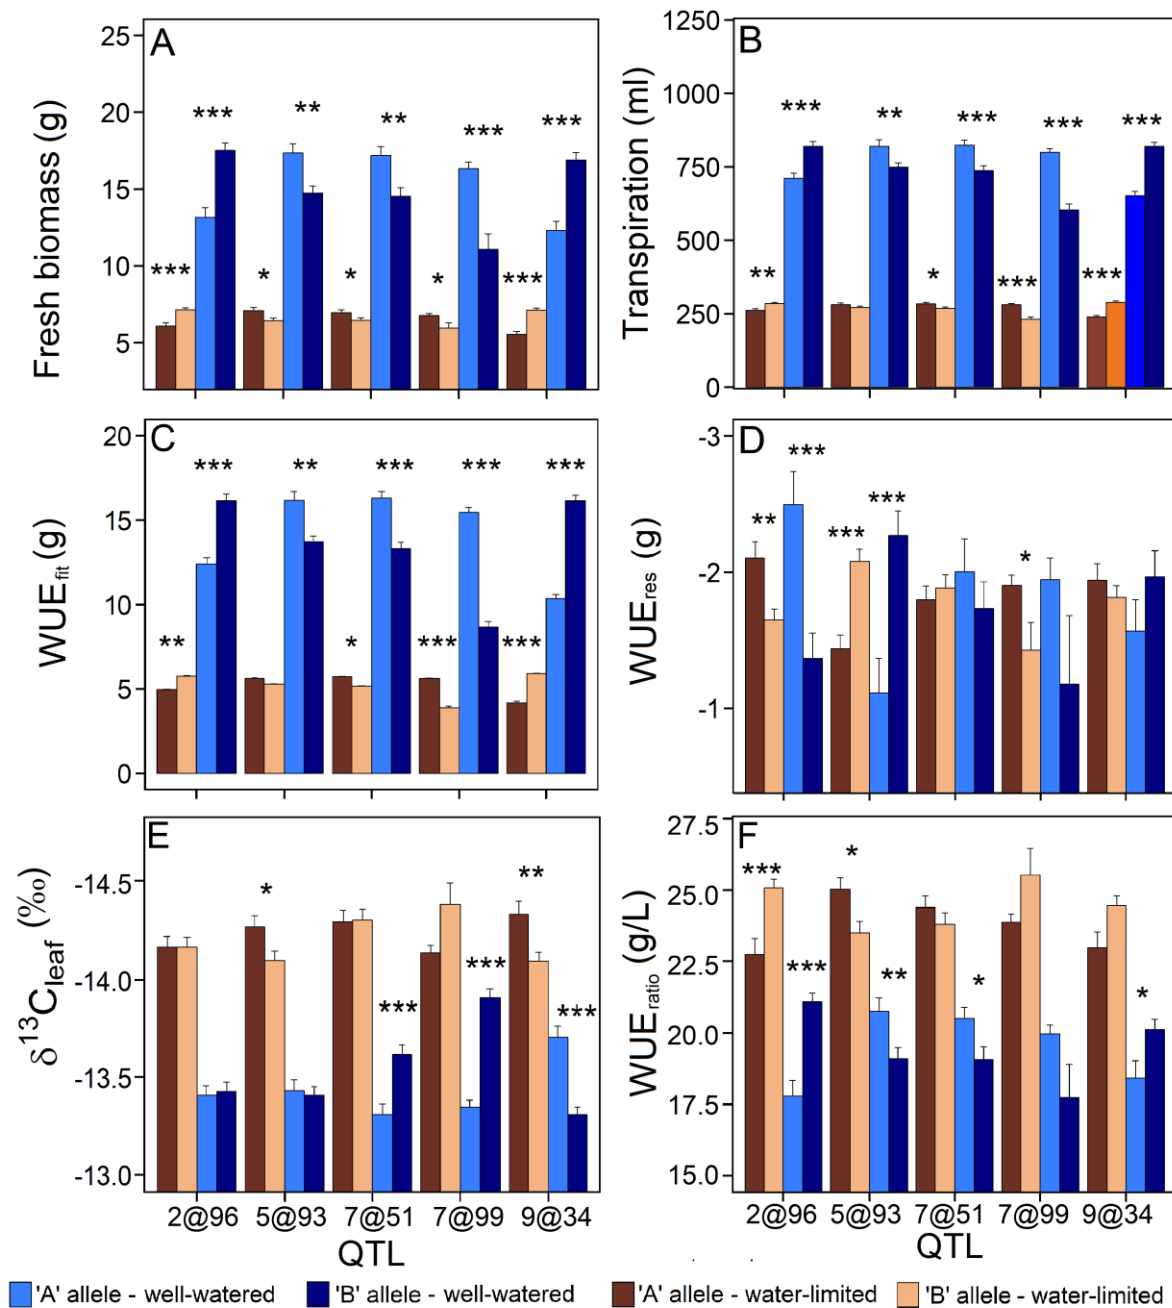

Figure S2. Effect of alleles of the five principal QTL identified for fresh biomass (A), transpiration (B), WUE<sub>fit</sub> (C), WUE<sub>res</sub> (D), and  $\delta^{13}\text{C}_{\text{leaf}}$  (E), and WUE<sub>ratio</sub> (F). 'A' represents the allele from the A10 parental line (*Setaria viridis*), and 'B' represents the allele from the B100 parental line (*Setaria italica*). Level of significance is denoted as the following: \*, \*\*, \*\*\* represent P < 0.05, 0.01, 0.0001, respectively.

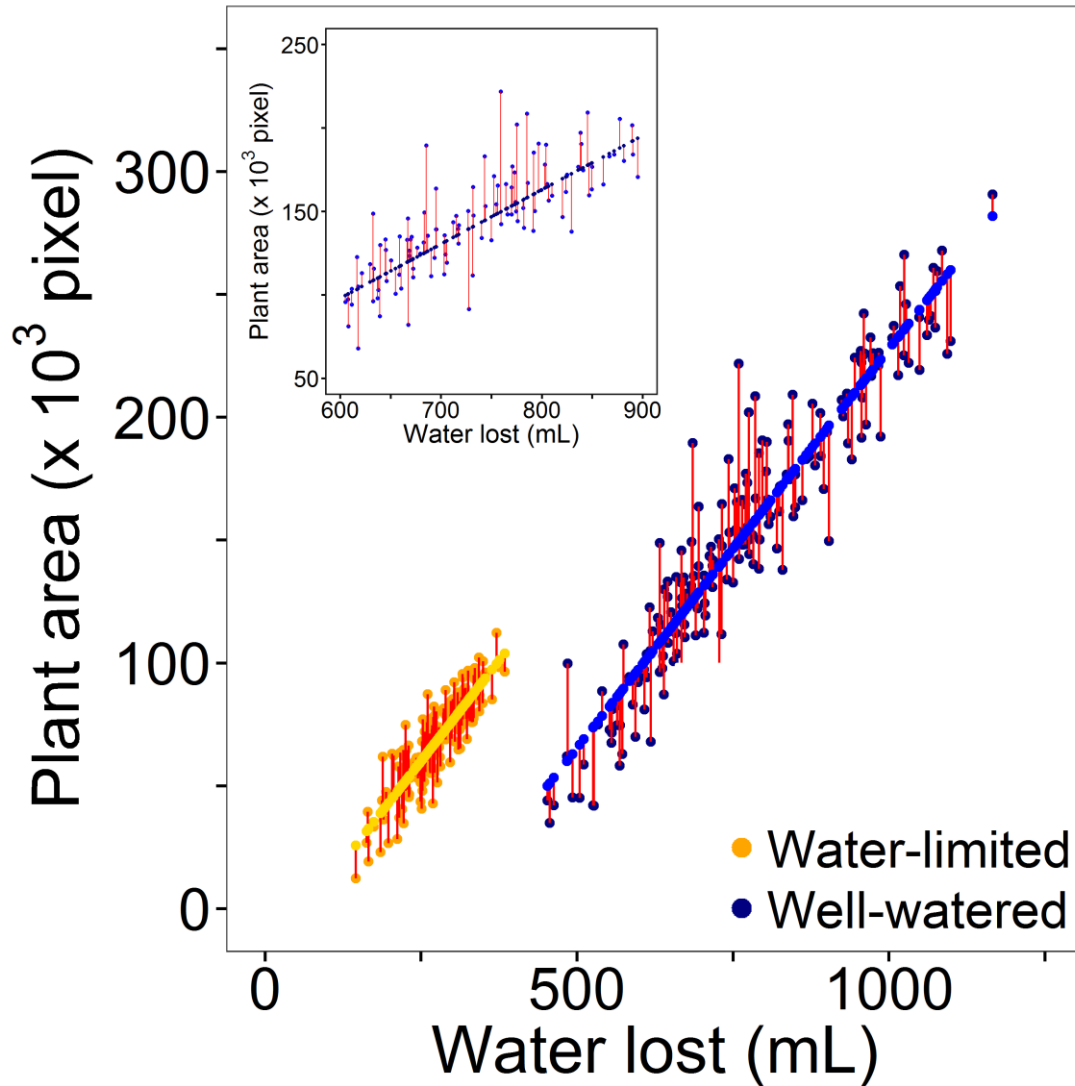

Figure S3. Method of measuring the residuals of an ordinary least squares (OLS) linear regression for plant size versus whole-plant transpiration on day 25. Blue and yellow points represent the model fit ( $WUE_{fit}$ ) in each treatment. Red vertical lines connecting points to the model fit ( $WUE_{res}$ ) represent residuals. Inset zooms in to the range from 600-900 ml of cumulative transpiration for the well-watered treatment only.



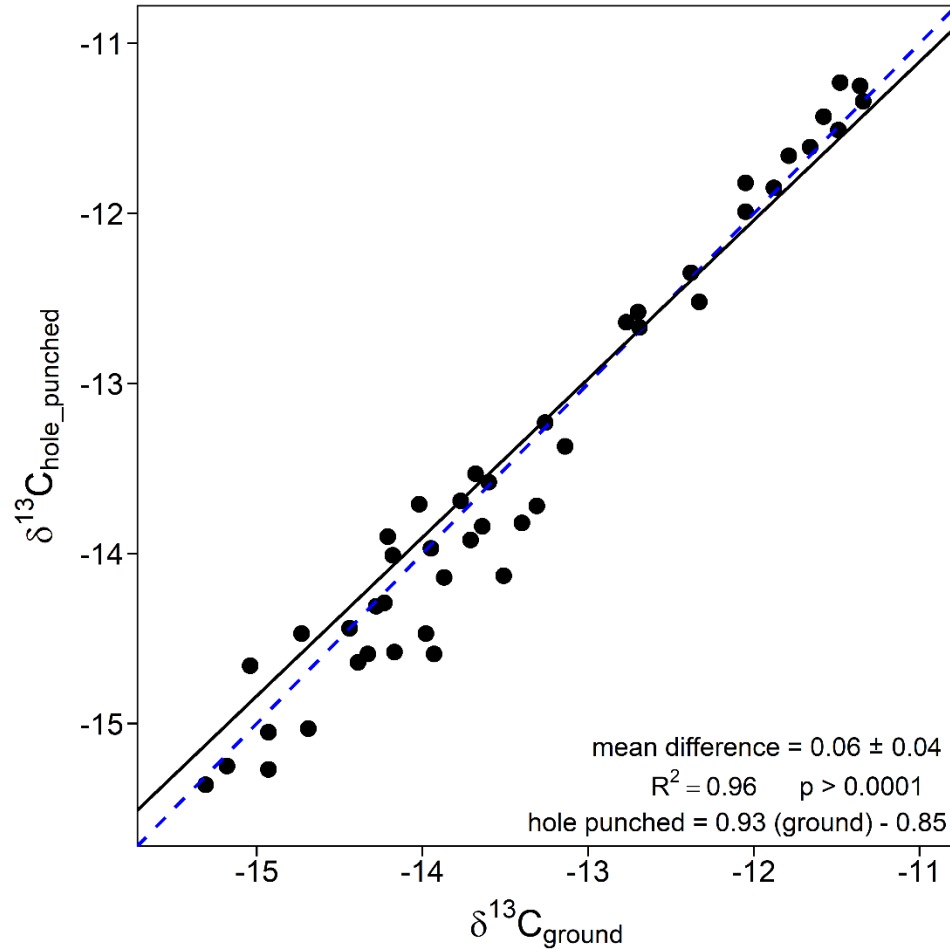

Figure S4. Comparison of the two sampling methods for  $\delta^{13}\text{C}_{\text{leaf}}$ . Principal method used to sample for  $\delta^{13}\text{C}_{\text{leaf}}$  was hole punching, which provided similar values to grinding the entire leaf and weighing out a subsample. Solid, black line represents the regression line. The dashed, blue represents 1:1 line.

## References Cited

1. Morison JI, Baker NR, Mullineaux PM, & Davies WJ (2008) Improving water use in crop production. *Philos Trans R Soc Lond B Biol Sci* 363(1491):639-658.
2. Passioura J (1977) Grain yield, harvest index, and water use of wheat. *J Aust Inst Agric Sci*.
3. Sinclair TR, Tanner C, & Bennett J (1984) Water-use efficiency in crop production. *Bioscience* 34(1):36-40.
4. Vadez V, Kholova J, Medina S, Kakker A, & Anderberg H (2014) Transpiration efficiency: new insights into an old story. *J Exp Bot* 65(21):6141-6153.
5. Bierhuizen J & Slatyer R (1965) Effect of atmospheric concentration of water vapour and CO<sub>2</sub> in determining transpiration-photosynthesis relationships of cotton leaves. *Agricultural Meteorology* 2(4):259-270.
6. Medrano H, *et al.* (2015) Improving water use efficiency of vineyards in semi-arid regions. A review. *Agronomy for Sustainable Development* 35(2):499-517.
7. Deng X-P, Shan L, Zhang H, & Turner NC (2006) Improving agricultural water use efficiency in arid and semiarid areas of China. *Agricultural Water Management* 80(1):23-40.
8. Westgate M, Forcella F, Reicosky D, & Somsen J (1997) Rapid canopy closure for maize production in the northern US corn belt: radiation-use efficiency and grain yield. *Field Crops Res* 49(2-3):249-258.
9. Richards RA, Hunt JR, Kirkegaard JA, & Passioura JB (2014) Yield improvement and adaptation of wheat to water-limited environments in Australia—a case study. *Crop and Pasture Science* 65(7):676-689.
10. Farquhar GD, Hubick KT, Condon AG, & Richards RA (1989) Carbon isotope fractionation and plant water-use efficiency. *Stable isotopes in ecological research*, (Springer), pp 21-40.
11. Farquhar GD, Ehleringer JR, & Hubick KT (1989) Carbon isotope discrimination and photosynthesis. *Annu Rev Plant Biol* 40(1):503-537.
12. Farquhar GD & Richards RA (1984) Isotopic composition of plant carbon correlates with water-use efficiency of wheat genotypes. *Funct Plant Biol* 11(6):539-552.
13. Coupel-Ledru A, *et al.* (2016) Reduced nighttime transpiration is a relevant breeding target for high water-use efficiency in grapevine. *Proc Natl Acad Sci U S A* 113(32):8963-8968.
14. Flexas J, *et al.* (2010) Improving water use efficiency in grapevines: potential physiological targets for biotechnological improvement. *Australian Journal of Grape and Wine Research* 16:106-121.
15. Condon AG, Richards RA, Rebetzke GJ, & Farquhar GD (2002) Improving intrinsic water-use efficiency and crop yield. *Crop Sci* 42(1):122-131.
16. Ghannoum O (2016) How can we breed for more water use-efficient sugarcane? *J Exp Bot* 67(3):557-559.
17. Jackson P, *et al.* (2015) Genetic variation in transpiration efficiency and relationships between whole plant and leaf gas exchange measurements in *Saccharum* spp. and related germplasm. *J Exp Bot* 67(3):861-871.
18. Condon AG, Richards RA, Rebetzke GJ, & Farquhar GD (2004) Breeding for high water-use efficiency. *J Exp Bot* 55(407):2447-2460.

19. Condon AG, Richards RA, & Farquhar GD (1987) Carbon isotope discrimination is positively correlated with grain yield and dry matter production in field-grown wheat. *Crop Sci* 27(5):996-1001.
20. Farquhar GD (1983) On the nature of carbon isotope discrimination in C<sub>4</sub> species. *Funct Plant Biol* 10(2):205-226.
21. Cabrera-Bosquet L, Molero G, Nogués S, & Araus JL (2009) Water and nitrogen conditions affect the relationships of  $\Delta^{13}\text{C}$  and  $\Delta^{18}\text{O}$  to gas exchange and growth in durum wheat. *J Exp Bot* 60(6):1633-1644.
22. Cabrera-Bosquet L, Albrizio R, Nogués S, & Araus JL (2011) Dual  $\Delta^{13}\text{C}/\delta^{18}\text{O}$  response to water and nitrogen availability and its relationship with yield in field-grown durum wheat. *Plant Cell Environ* 34(3):418-433.
23. Elazab A, Molero G, Serret MD, & Araus JL (2012) Root traits and  $\delta^{13}\text{C}$  and  $\delta^{18}\text{O}$  of durum wheat under different water regimes. *Funct Plant Biol* 39(5):379-393.
24. Yousfi S, Serret MD, Márquez AJ, Voltas J, & Araus JL (2012) Combined use of  $\delta^{13}\text{C}$ ,  $\delta^{18}\text{O}$  and  $\delta^{15}\text{N}$  tracks nitrogen metabolism and genotypic adaptation of durum wheat to salinity and water deficit. *New Phytol* 194(1):230-244.
25. Araus JL, Cabrera-Bosquet L, Serret MD, Bort J, & Nieto-Taladriz MT (2013) Comparative performance of  $\delta^{13}\text{C}$ ,  $\delta^{18}\text{O}$  and  $\delta^{15}\text{N}$  for phenotyping durum wheat adaptation to a dryland environment. *Funct Plant Biol* 40(6):595-608.
26. Cabrera-Bosquet L, Crossa J, von Zitzewitz J, Serret MD, & Luis Araus J (2012) High-throughput phenotyping and genomic selection: The frontiers of crop breeding converge. *J Integr Plant Biol* 54(5):312-320.
27. Henderson S, Von Caemmerer S, Farquhar GD, Wade L, & Hammer G (1998) Correlation between carbon isotope discrimination and transpiration efficiency in lines of the C<sub>4</sub> species *Sorghum bicolor* in the glasshouse and the field. *Funct Plant Biol* 25(1):111-123.
28. Cabrera-Bosquet L, Sánchez C, & Araus JL (2009) Oxygen isotope enrichment ( $\Delta^{18}\text{O}$ ) reflects yield potential and drought resistance in maize. *Plant Cell Environ* 32(11):1487-1499.
29. Ellsworth PZ, Ellsworth PV, & Cousins A (2017) Leaf oxygen and carbon isotopic signatures reflect drought resistance and water use efficiency in the C<sub>4</sub> grasses *Setaria viridis* and *Setaria italica*. *J Exp Bot*.
30. Xu L-K & Hsiao TC (2004) Predicted versus measured photosynthetic water-use efficiency of crop stands under dynamically changing field environments. *J Exp Bot* 55(407):2395-2411.
31. Medrano H, *et al.* (2015) From leaf to whole-plant water use efficiency (WUE) in complex canopies: limitations of leaf WUE as a selection target. *The Crop Journal* 3(3):220-228.
32. Tomás M, *et al.* (2014) Variability of water use efficiency in grapevines. *Environ Exper Bot* 103:148-157.
33. Tomás M, *et al.* (2012) Water-use efficiency in grapevine cultivars grown under controlled conditions: effects of water stress at the leaf and whole-plant level. *Australian Journal of Grape and Wine Research* 18(2):164-172.
34. Tarara JM, Peña JEP, Keller M, Schreiner RP, & Smithyman RP (2011) Net carbon exchange in grapevine canopies responds rapidly to timing and extent of regulated deficit irrigation. *Funct Plant Biol* 38(5):386-400.

35. Terashima I & Hikosaka K (1995) Comparative ecophysiology of leaf and canopy photosynthesis. *Plant Cell Environ* 18(10):1111-1128.
36. Poni S, *et al.* (2009) Performance and water-use efficiency (single-leaf vs. whole-canopy) of well-watered and half-stressed split-root Lambrusco grapevines grown in Po Valley (Italy). *Agric Ecosyst Environ* 129(1):97-106.
37. Gibberd MR, Walker RR, Blackmore DH, & Condon AG (2001) Transpiration efficiency and carbon-isotope discrimination of grapevines grown under well-watered conditions in either glasshouse or vineyard. *Australian Journal of Grape and Wine Research* 7(3):110-117.
38. Chaves MM, *et al.* (2007) Deficit irrigation in grapevine improves water-use efficiency while controlling vigour and production quality. *Ann Appl Biol* 150(2):237-252.
39. Cerasoli S, *et al.* (2004) Carbon and nitrogen winter storage and remobilisation during seasonal flush growth in two-year-old cork oak (*Quercus suber* L.) saplings. *Ann For Sci* 61:721-729.
40. Pinto H, Powell JR, Sharwood RE, Tissue DT, & Ghannoum O (2015) Variations in nitrogen use efficiency reflect the biochemical subtype while variations in water use efficiency reflect the evolutionary lineage of C<sub>4</sub> grasses at inter-glacial CO<sub>2</sub>. *Plant Cell Environ* 39(3):514-526.
41. Fahlgren N, *et al.* (2015) A versatile phenotyping system and analytics platform reveals diverse temporal responses to water availability in *Setaria*. *Molecular Plant* 8(10):1520-1535.
42. Feldman MJ, *et al.* (2018) Trait components of whole plant water use efficiency are defined by unique, environmentally responsive genetic signatures in the model C<sub>4</sub> grass *Setaria*. *bioRxiv*.
43. Xu Y, *et al.* (2009) Leaf-level water use efficiency determined by carbon isotope discrimination in rice seedlings: genetic variation associated with population structure and QTL mapping. *Theor Appl Genet* 118(6):1065-1081.
44. Takai T, Fukuta Y, Sugimoto A, Shiraiwa T, & Horie T (2006) Mapping of QTLs controlling carbon isotope discrimination in the photosynthetic system using recombinant inbred lines derived from a cross between two different rice (*Oryza sativa* L.) cultivars. *Plant Prod Sci* 9(3):271-280.
45. Takai T, *et al.* (2009) Detection of a quantitative trait locus controlling carbon isotope discrimination and its contribution to stomatal conductance in japonica rice. *Theor Appl Genet* 118(7):1401-1410.
46. Teulat B, *et al.* (2002) QTLs for grain carbon isotope discrimination in field-grown barley. *TAG Theoretical and Applied Genetics* 106(1):118-126.
47. Des Marais DL, Razzaque S, Hernandez KM, Garvin DF, & Juenger TE (2016) Quantitative trait loci associated with natural diversity in water-use efficiency and response to soil drying in *Brachypodium distachyon*. *Plant Science*.
48. Rebetzke GJ, Condon AG, Farquhar GD, Appels R, & Richards RA (2008) Quantitative trait loci for carbon isotope discrimination are repeatable across environments and wheat mapping populations. *Theor Appl Genet* 118(1):123-137.
49. Xu X, *et al.* (2008) Fine mapping a QTL for carbon isotope composition in tomato. *Theor Appl Genet* 117(2):221-233.

50. Juenger TE, *et al.* (2005) Identification and characterization of QTL underlying whole-plant physiology in *Arabidopsis thaliana*:  $\delta^{13}\text{C}$ , stomatal conductance and transpiration efficiency. *Plant Cell Environ* 28(6):697-708.
51. McKay JK, *et al.* (2008) Genetics of drought adaptation in *Arabidopsis thaliana* II. QTL Analysis of a new mapping population, Kas-1 $\times$  Tsu-1. *Evolution* 62(12):3014-3026.
52. Adiredjo AL, *et al.* (2014) Genetic control of water use efficiency and leaf carbon isotope discrimination in sunflower (*Helianthus annuus* L.) subjected to two drought scenarios. *PLoS ONE* 9(7):e101218-e101218.
53. Dhanapal AP, *et al.* (2015) Genome-wide association study (GWAS) of carbon isotope ratio ( $\delta^{13}\text{C}$ ) in diverse soybean [*Glycine max* (L.) Merr.] genotypes. *Theor Appl Genet* 128(1):73-91.
54. Saranga Y, Jiang CX, Wright R, Yakir D, & Paterson A (2004) Genetic dissection of cotton physiological responses to arid conditions and their inter-relationships with productivity. *Plant Cell Environ* 27(3):263-277.
55. Brendel O, *et al.* (2008) Quantitative trait loci controlling water use efficiency and related traits in *Quercus robur* L. *Tree Genet Genomes* 4(2):263-278.
56. Thumma BR, *et al.* (2001) Identification of causal relationships among traits related to drought resistance in *Stylosanthes scabra* using QTL analysis. *J Exp Bot* 52(355):203-214.
57. Easlon HM, *et al.* (2014) The physiological basis for genetic variation in water use efficiency and carbon isotope composition in *Arabidopsis thaliana*. *Photosynth Res* 119(1-2):119-129.
58. Masle J, Gilmore SR, & Farquhar GD (2005) The ERECTA gene regulates plant transpiration efficiency in *Arabidopsis*. *Nature* 436(7052):866-870.
59. Gresset S, *et al.* (2014) Stable carbon isotope discrimination is under genetic control in the C<sub>4</sub> species maize with several genomic regions influencing trait expression. *Plant Physiol* 164(1):131-143.
60. Wang Z, Devos K, Liu C, Wang R, & Gale M (1998) Construction of RFLP-based maps of foxtail millet, *Setaria italica* (L.) P. Beauv. *Theor Appl Genet* 96(1):31-36.
61. Devos KM, Wang Z, Beales J, Sasaki T, & Gale M (1998) Comparative genetic maps of foxtail millet (*Setaria italica*) and rice (*Oryza sativa*). *Theor Appl Genet* 96(1):63-68.
62. von Caemmerer S, Ghannoum O, Pengelly JJ, & Cousins AB (2014) Carbon isotope discrimination as a tool to explore C<sub>4</sub> photosynthesis. *J Exp Bot* 65(13):3459-3470.
63. Cabrera-Bosquet L, Sánchez C, & Araus JL (2009) How yield relates to ash content,  $\Delta^{13}\text{C}$  and  $\Delta^{18}\text{O}$  in maize grown under different water regimes. *Ann Bot* 104(6):1207-1216.
64. Monneveux P, Sheshshayee MS, Akhter J, & Ribaut J-M (2007) Using carbon isotope discrimination to select maize (*Zea mays* L.) inbred lines and hybrids for drought tolerance. *Plant Science* 173(4):390-396.
65. Lambrides C, Chapman S, & Shorter R (2004) Genetic variation for carbon isotope discrimination in sunflower. *Crop Sci* 44(5):1642-1653.
66. Feldman MJ, *et al.* (2017) Time dependent genetic analysis links field and controlled environment phenotypes in the model C<sub>4</sub> grass *Setaria*. *PLoS Genet* 13(6):e1006841.
67. Nakhforoosh A, Bodewein T, Fiorani F, & Bodner G (2016) Identification of water use strategies at early growth stages in durum wheat from shoot phenotyping and physiological measurements. *Frontiers in Plant Science* 7.



68. Lopez JR, *et al.* (2017) QTLs associated with crown root angle, stomatal conductance, and maturity in Sorghum. *Plant Genome*.
69. Impa S, *et al.* (2005) Carbon isotope discrimination accurately reflects variability in WUE measured at a whole plant level in rice. *Crop Sci* 45(6):2517-2522.
70. Flanagan LB & Farquhar GD (2014) Variation in the carbon and oxygen isotope composition of plant biomass and its relationship to water-use efficiency at the leaf-and ecosystem-scales in a northern Great Plains grassland. *Plant Cell Environ* 37(2):425-438.
71. Doust AN, Kellogg EA, Devos KM, & Bennetzen JL (2009) Foxtail millet: a sequence-driven grass model system. *Plant Physiol* 149(1):137-141.
72. Brenna JT, Corso TN, Tobias HJ, & Caimi RJ (1997) High-precision continuous-flow isotope ratio mass spectrometry. *Mass Spectrometry Reviews* 16(5):227-258.
73. Qi H, Coplen TB, Geilmann H, Brand WA, & Böhlke JK (2003) Two new organic reference materials for  $\delta^{13}\text{C}$  and  $\delta^{15}\text{N}$  measurements and a new value for the  $\delta^{13}\text{C}$  of NBS 22 oil. *Rapid Commun Mass Spectrom* 17(22):2483-2487.
74. Santrock J, Studley SA, & Hayes JM (1985) Isotopic analyses based on the mass spectra of carbon dioxide. *Analytical Chemistry* 57(7):1444-1448.
75. R\_Core\_Team (2013) R: A language and environment for statistical computing (Vienna, Austria).
76. Seibt U, Rajabi A, Griffiths H, & Berry JA (2008) Carbon isotopes and water use efficiency: sense and sensitivity. *Oecologia* 155(3):441-454.
77. Ubierna N, Sun W, & Cousins AB (2011) The efficiency of C<sub>4</sub> photosynthesis under low light conditions: assumptions and calculations with CO<sub>2</sub> isotope discrimination. *J Exp Bot* 62(9):3119-3134.
78. Sun W, Ubierna N, Ma J-Y, & Cousins AB (2012) The influence of light quality on C<sub>4</sub> photosynthesis under steady-state conditions in *Zea mays* and *Miscanthus × giganteus*: changes in rates of photosynthesis but not the efficiency of the CO<sub>2</sub> concentrating mechanism. *Plant Cell Environ* 35(5):982-993.
79. Kromdijk J, Ubierna N, Cousins AB, & Griffiths H (2014) Bundle-sheath leakiness in C<sub>4</sub> photosynthesis: a careful balancing act between CO<sub>2</sub> concentration and assimilation. *J Exp Bot* 65(13):3443-3457.
80. Sage RF (2014) Stopping the leaks: new insights into C<sub>4</sub> photosynthesis at low light. *Plant Cell Environ* 37(5):1037-1041.
81. Kubásek J, Šetlík J, Dwyer S, & Šantrůček J (2007) Light and growth temperature alter carbon isotope discrimination and estimated bundle sheath leakiness in C<sub>4</sub> grasses and dicots. *Photosynth Res* 91(1):47-58.
82. Henderson SA, Caemmerer SV, & Farquhar GD (1992) Short-term measurements of carbon isotope discrimination in several C<sub>4</sub> species. *Funct Plant Biol* 19(3):263-285.
83. Mook WG, Bommerson JC, & Staverman WH (1974) Carbon isotope fractionation between dissolved bicarbonate and gaseous carbon dioxide. *Earth Planet Sci Lett* 22(2):169-176.
