1  
2  
3  
4  
5  
6  
7  
8  
9  
10  
11  
12  
13  
14  
15  
16  
17  
18  
19  
20  
21  
22  
23  
24  
25  
26  
27  
28  
29  
30  
31  
32  
33  
34  
35

## A genetic link between leaf carbon isotope composition and whole-plant water use efficiency in the C<sub>4</sub> grass *Setaria*

Patrick Z. Ellsworth (0000-0002-0795-5200)<sup>1</sup>, Max J. Feldman (0000-0002-5415-4326)<sup>2</sup>,  
Ivan Baxter (0000-0001-6680-1722)<sup>2</sup>, Asaph B. Cousins (0000-0003-2424-714X)<sup>1</sup>  
<sup>1</sup>School of Biological Sciences, Washington State University  
<sup>2</sup>Donald Danforth Plant Sciences Center

### Summary

- Genetic selection for whole plant water use efficiency (yield per transpiration; WUE<sub>plant</sub>) in any crop-breeding program requires high throughput phenotyping of component traits of WUE<sub>plant</sub> such as transpiration efficiency (TE<sub>i</sub>; CO<sub>2</sub> assimilation rate per stomatal conductance). Leaf carbon stable isotope composition ( $\delta^{13}\text{C}_{\text{leaf}}$ ) has been suggested as a potential proxy for WUE<sub>plant</sub> because both parameters are influenced by TE<sub>i</sub>. However, a genetic link between  $\delta^{13}\text{C}_{\text{leaf}}$  and WUE<sub>plant</sub> in a C<sub>4</sub> species is still not well understood.
- Therefore, a high throughput phenotyping facility was used to measure WUE<sub>plant</sub> in a recombinant inbred line (RIL) population of the C<sub>4</sub> grasses *Setaria viridis* and *S. italica* to determine the genetic relationship between  $\delta^{13}\text{C}_{\text{leaf}}$ , WUE<sub>plant</sub>, and TE<sub>i</sub> under well-watered and water-limited growth conditions.
- Three quantitative trait loci (QTL) for  $\delta^{13}\text{C}_{\text{leaf}}$  were found to co-localize with transpiration, biomass accumulation, and WUE<sub>plant</sub>. WUE<sub>plant</sub> calculated for each of the three  $\delta^{13}\text{C}_{\text{leaf}}$  allele classes was negatively correlated with  $\delta^{13}\text{C}_{\text{leaf}}$  as would be predicted when TE<sub>i</sub> is driving WUE<sub>plant</sub>.
- These results demonstrate that  $\delta^{13}\text{C}_{\text{leaf}}$  is genetically linked to WUE<sub>plant</sub> through TE<sub>i</sub> and can be used as a high throughput proxy to screen for WUE<sub>plant</sub> in these C<sub>4</sub> species.

**Key words:** quantitative trait loci, leaf carbon isotopes, C<sub>4</sub> photosynthesis, *Setaria*, water use efficiency, phenotyping, genetic architecture, drought, transpiration efficiency

## 36 Introduction

37 Water availability constrains agricultural production and threatens food security  
38 in many drought-prone regions (Morison *et al.*, 2008). Therefore, improving the  
39 harvestable yield relative to water supplied to crop systems (agronomic water use  
40 efficiency;  $WUE_{ag}$ ) has long received attention from researchers and government  
41 agencies (Bierhuizen & Slatyer, 1965; Passioura, 1977; Sinclair *et al.*, 1984; Vadez *et al.*,  
42 2014). It has been proposed by Passioura (1977) that yield could be improved relative to  
43 available water by increasing (1) the ratio of transpiration ( $T$ ) to evapotranspiration  
44 ( $ET$ ), (2) whole plant water use efficiency (ratio of biomass production to total  
45 transpiration;  $WUE_{plant}$ ), and (3) harvest index (HI). To date, increases in  $WUE_{ag}$  have  
46 been primarily made by improved management practices that increase  $T/ET$  such as  
47 reducing runoff and evaporation from the soil through improved irrigation methods  
48 (Deng *et al.*, 2006; Medrano *et al.*, 2015a), increased canopy cover (Westgate *et al.*, 1997)  
49 and mulching (Medrano *et al.*, 2015a). Additionally, selecting for greater HI has  
50 increased  $WUE_{ag}$ , for example, with semi-dwarf wheat varieties (Richards *et al.*, 2014).  
51 As improvements in  $WUE_{ag}$  through management practice reach their theoretical  
52 maximum, the greatest increases in  $WUE_{ag}$  will be through improved  $WUE_{plant}$ , which  
53 have so far been minimal (Condon *et al.*, 2004; Deng *et al.*, 2006; Medrano *et al.*, 2015a).

54 To date, the limited improvement in  $WUE_{plant}$  is primarily because  $WUE_{plant}$  is a  
55 complex trait that is influenced by 1) net  $CO_2$  assimilation ( $A_{net}$ ) relative to water loss via  
56 stomatal conductance ( $g_s$ ), (i.e. the intrinsic transpiration efficiency,  $A_{net}/g_s$ ;  $TE_i$ ), 2) the  
57 proportion of carbon loss from whole plant respiration ( $\phi_c$ ), 3) “unproductive” water  
58 loss from cuticular and nighttime transpiration ( $\phi_w$ ), and 4) the evaporative demand  
59 between the atmosphere and the plant (See theory section; Farquhar & Richards, 1984;  
60 Farquhar, Graham D. *et al.*, 1989; Farquhar, G. D. *et al.*, 1989). Theoretically, the first  
61 three of these factors can be selected for through plant breeding, but these traits,  
62 especially  $\phi_c$  and  $\phi_w$ , are determined by a complex set of traits that are difficult to  
63 measure and select for in breeding programs (Condon *et al.*, 2002; Flexas *et al.*, 2010;  
64 Coupel-Ledru *et al.*, 2016). Alternatively, in theory,  $TE_i$  is an ideal trait to select for  
65 because it is independent of environmental conditions driving changes in evaporative  
66 demands (Ghannoum, 2016), and it is an important component of  $WUE_{plant}$  because it  
67 relates to both  $CO_2$  and  $H_2O$  leaf exchange, influencing both photosynthetic capacity  
68 and  $T$  (Condon *et al.*, 2002; Condon *et al.*, 2004). Unfortunately, the primary method of  
69 estimating  $TE_i$  is by gas exchange measurements of  $A_{net}/g_s$  that do not integrate well

70 over time and generally do not represent  $TE_i$  over the lifetime of the plant or even the  
71 leaf (Condon *et al.*, 2004). Furthermore, these measurements are prohibitively time-  
72 consuming and laborious, making this method impractical for selecting for  $WUE_{plant}$  in a  
73 plant-breeding program; thus, a high throughput proxy of  $WUE_{plant}$  is needed.

74 Alternatively, leaf carbon isotope composition ( $\delta^{13}C_{leaf}$ ) has long been promoted  
75 as a proxy for an integrated measurement of  $TE_i$  in  $C_3$  and potentially in  $C_4$  species  
76 (Farquhar, 1983; Farquhar & Richards, 1984; Condon *et al.*, 1987; Farquhar, Graham D. *et*  
77 *al.*, 1989; Farquhar, G. D. *et al.*, 1989). In  $C_3$  plants, the relationship between  $\delta^{13}C_{leaf}$  and  
78  $TE_i$  has been tested and even integrated into breeding programs (Farquhar & Richards,  
79 1984; Condon *et al.*, 2002; Condon *et al.*, 2004; Cabrera-Bosquet, L. *et al.*, 2009; Cabrera-  
80 Bosquet *et al.*, 2011; Cabrera-Bosquet *et al.*, 2012; Elazab *et al.*, 2012; Yousfi *et al.*, 2012;  
81 Araus *et al.*, 2013). However, it remains uncertain if  $\delta^{13}C_{leaf}$  is an effective proxy of  $TE_i$  in  
82  $C_4$  species because it has not been determined if there is adequate response in  $\delta^{13}C_{leaf}$  to  
83  $TE_i$  and if there is genotypic variation in  $\delta^{13}C_{leaf}$  that has a physiological relationship  
84 with  $WUE_{plant}$ . Nonetheless, empirical evidence in multiple  $C_4$  species such as *Setaria*  
85 *viridis*, *S. italica*, *Zea mays*, and *Sorghum bicolor* supports the theoretical relationship  
86 between  $\delta^{13}C_{leaf}$  and  $TE_i$  (Henderson *et al.*, 1998; Cabrera-Bosquet *et al.*, 2009; Ellsworth *et*  
87 *al.*, 2017). These studies also demonstrated consistent differences in  $\delta^{13}C_{leaf}$  between  
88 well-watered and water-limited plants that negatively correlated with  $TE_i$ . Additionally,  
89 in *S. viridis* and *S. italica*,  $TE_i$  correlated with  $WUE_{plant}$  (Ellsworth *et al.*, 2017). However, a  
90 correlation between  $TE_i$  and  $WUE_{plant}$  has not always been found in  $C_3$  and  $C_4$  species  
91 (Terashima & Hikosaka, 1995; Gibberd *et al.*, 2001; Cerasoli *et al.*, 2004; Xu & Hsiao,  
92 2004; Chaves *et al.*, 2007; Poni *et al.*, 2009; Tarara *et al.*, 2011; Tomás *et al.*, 2012; Tomás *et*  
93 *al.*, 2014; Medrano *et al.*, 2015b; Pinto *et al.*, 2015). Therefore, further investigations are  
94 needed to delineate the component traits, including  $TE_i$ , that collectively compose  
95  $WUE_{plant}$  and how they affect the relative importance of  $TE_i$  to  $WUE_{plant}$ , particularly in  
96  $C_4$  plants.

97 The genetic control of  $WUE_{plant}$  and its relationship to  $TE_i$  and  $\delta^{13}C_{leaf}$  can  
98 potentially be identified using large mapping populations grown on automated  
99 phenotyping systems that measure whole plant water use and biomass accumulation on  
100 hundreds of individual plants (Fahlgren *et al.*, 2015; Feldman *et al.*, 2018). Therefore, the  
101 physiological traits, biomass accumulation, transpiration,  $WUE_{plant}$ , and  $\delta^{13}C_{leaf}$ , can be  
102 studied to determine their genetic architecture and relationships. In fact, quantitative

103 trait loci (QTL) have been found for  $\delta^{13}\text{C}_{\text{leaf}}$  in several  $\text{C}_3$  species such as rice (Takai *et al.*,  
104 2006; Takai *et al.*, 2009; Xu *et al.*, 2009), barley (Teulat *et al.*, 2002), *Brachypodium*  
105 *distachyon* (Des Marais *et al.*, 2016), wheat (Rebetzke *et al.*, 2008), tomato (Xu *et al.*, 2008),  
106 *Arabidopsis* (Juenger *et al.*, 2005; McKay *et al.*, 2008), sunflower (Adiredjo *et al.*, 2014),  
107 soybean (Dhanapal *et al.*, 2015), cotton (Saranga *et al.*, 2004), *Quercus robur* (Brendel *et al.*,  
108 2008), and *Stylosanthes scabra* (Thumma *et al.*, 2001). Additionally, a few studies on  $\text{C}_3$   
109 plants have found co-localized QTL for  $\delta^{13}\text{C}_{\text{leaf}}$  and  $\text{WUE}_{\text{plant}}$  (Adiredjo *et al.*, 2014; Easlon  
110 *et al.*, 2014), and, in one case,  $\delta^{13}\text{C}_{\text{leaf}}$  and  $\text{TE}_i$  were associated with a causal gene  
111 (ERECTA; Masle *et al.*, 2005). However, to date only in two studies  $\delta^{13}\text{C}$  was found to be  
112 under genetic control in a  $\text{C}_4$  species (maize; Gresset *et al.*, 2014; Twohey III *et al.*, 2018),  
113 and in a follow-up study a genomic region was identified that affected both  $\delta^{13}\text{C}_{\text{leaf}}$  and  
114  $\text{WUE}_{\text{plant}}$  (Avramova *et al.*, 2018). Now more research is necessary to develop a more  
115 thorough understanding of the physiological relationship and genetic architecture of  
116  $\delta^{13}\text{C}_{\text{leaf}}$ ,  $\text{TE}_i$ , and  $\text{WUE}_{\text{plant}}$ , so that marker-assisted breeding can be effectively used to  
117 select for  $\text{WUE}_{\text{plant}}$  and  $\text{TE}_i$  in  $\text{C}_4$  plants.

118 Here a recombinant inbred line (RIL) population of 189 lines created from  
119 accession A10 of *S. viridis* (L.) P. Beauv. and accession B100 of *S. italica* (L.) P. Beauv.  
120 was used to screen for  $\text{WUE}_{\text{plant}}$ ,  $\text{TE}_i$ , and  $\delta^{13}\text{C}_{\text{leaf}}$  (Devos *et al.*, 1998; Wang *et al.*, 1998;  
121 Feldman *et al.*, 2018). Both *S. viridis* and *S. italica* are model  $\text{C}_4$  grasses in the same  
122 panicoid clade as important  $\text{C}_4$  crops such as maize, sugarcane, sorghum, Miscanthus,  
123 and the emerging bioenergy crop switchgrass. The objectives of this study were to  
124 compare  $\delta^{13}\text{C}_{\text{leaf}}$  between plants grown under well-watered and water-limited  
125 conditions and to determine the genetic and physiological relationship between  
126  $\text{WUE}_{\text{plant}}$ ,  $\text{TE}_i$ , and  $\delta^{13}\text{C}_{\text{leaf}}$ .

## 127 Theory

128 Agricultural water use efficiency ( $\text{WUE}_{\text{ag}}$ ) can be defined as the crop yield per  
129 unit water supplied to the crop system. Where crop yield relative to water use can be  
130 calculated as a function of evapotranspiration ( $ET$ ), the proportion of  $ET$  that is  
131 transpired ( $T/ET$ ),  $\text{WUE}_{\text{plant}}$ , and the harvest index (harvested proportion of biomass;  
132 Eqn 1; Passioura, 1977; Condon *et al.*, 2002) as

$$\text{Yield} = ET \times \frac{T}{ET} \times \text{WUE}_{\text{plant}} \times \text{HI}. \quad \text{Equation 1}$$

133 WUE<sub>ag</sub> can be improved by maximizing the proportion of water inputs that are  
134 transpired at the field scale, increasing the ratio of biomass produced to water  
135 transpired, and improving the harvestable portion of the crop. Increasing the  
136 proportion of water transpired can be obtained through better crop and water  
137 management. On the other hand, the ratio of biomass and water transpired is a  
138 physiological process encapsulated in WUE<sub>plant</sub> and improving WUE<sub>plant</sub> is an important  
139 factor in increasing WUE<sub>ag</sub> because it relates the fundamental relationship between  
140 carbon and water flux between the plant and its environment.

141 WUE<sub>plant</sub> relates to net CO<sub>2</sub> assimilation rates ( $A_{net}$ ) relative to transpiration rate  
142 ( $T$ ) at the whole plant level, and accounts for the proportion of fixed carbon that is lost  
143 ( $\phi_c$ ) such as respiration and the proportion of water loss that is "unproductive" ( $\phi_w$ )  
144 such as nighttime transpiration ( $T_{night}$ ) or cuticular evaporation because it is not  
145 associated with CO<sub>2</sub> assimilation (Eqn 2; Farquhar, Graham D. *et al.*, 1989; Seibt *et al.*,  
146 2008). The relationship of these parameters to WUE<sub>plant</sub> can be defined as

$$WUE_{plant} = \frac{A_{net}(1 - \phi_c)}{T(1 + \phi_w)} \quad \text{Equation 2}$$

147 where  $A_{net}$  and  $T$  are related through stomatal conductance ( $g_s$ ) as

$$A_{net} = g_{sCO_2}(C_a - C_i) \quad \text{Equation 3}$$

148 and

$$T = g_{sH_2O}(e_i - e_a). \quad \text{Equation 4}$$

149 The parameter ( $e_i - e_a$ ) is the water vapor molar difference between intercellular and  
150 ambient air at leaf temperature, ( $C_a - C_i$ ) is the CO<sub>2</sub> molar difference between  
151 intercellular and ambient CO<sub>2</sub>, and  $g_{sCO_2}$  and  $g_{sH_2O}$  are the conductance values for CO<sub>2</sub>  
152 and H<sub>2</sub>O, respectively (Farquhar & Richards, 1984; Farquhar, Graham D. *et al.*, 1989;  
153 Farquhar, G. D. *et al.*, 1989). Substituting Eqns 3 and 4 into Eqn 2 gives

$$WUE_{plant} = \frac{g_{sCO_2}(C_a - C_i)(1 - \phi_c)}{g_{sH_2O}(e_i - e_a)(1 + \phi_w)} = \frac{C_a \left(1 - \frac{C_i}{C_a}\right) (1 - \phi_c)}{1.6v(1 + \phi_w)} \quad \text{Equation 5}$$

154 where  $v$  is the evaporative demand ( $e_i - e_a$ ), and the ratio of diffusivities of H<sub>2</sub>O and CO<sub>2</sub>  
 155 in air is 1.6. The molar ratio of intercellular to ambient CO<sub>2</sub> ( $C_i/C_a$ ) influences  $WUE_{plant}$   
 156 because it represents the relative drawdown of intercellular CO<sub>2</sub> ( $C_i$ ) by photosynthesis  
 157 and the conductance of CO<sub>2</sub> into the leaf and the conductance of water vapor out the  
 158 leaf via the stomata. Intrinsic TE ( $A_{net}/g_s$ ;  $TE_i$ ) is equal to the CO<sub>2</sub> gradient from ambient  
 159 to intercellular spaces ( $C_i - C_a$ ), which can be rewritten as  $C_a(1 - C_i/C_a)$ . Therefore, Eqn 5  
 160 can be simplified as a function of  $TE_i$  (Eqn 6).  $TE_i$  and leaf carbon composition ( $\delta^{13}C_{leaf}$ )  
 161 form a relationship through their common relationship with  $C_i/C_a$ .

$$WUE_{plant} = \frac{TE_i(1 - \phi_c)}{1.6v(1 + \phi_w)} \quad \text{Equation 6}$$

162 The relationship between  $\delta^{13}C_{leaf}$  and  $TE_i$  is based on 1) variation in  $\delta^{13}C_{leaf}$  (‰) of  
 163 plants grown in the same atmospheric conditions is primarily controlled by leaf CO<sub>2</sub>  
 164 isotope discrimination ( $\Delta^{13}C$ ), 2)  $\Delta^{13}C$  is influenced by changes in  $C_i/C_a$  and 3)  $C_i/C_a$ , as  
 165 stated above, is affected by the interrelationship  $A_{net}$  and  $g_s$ . Therefore,  $TE_i$  ( $A_{net}/g_s$ ) is  
 166 related to  $C_i/C_a$  and, in turn,  $\Delta^{13}C$  (Farquhar, G. D. *et al.*, 1989; Henderson *et al.*, 1998).

167 Finally,  $\Delta^{13}C_{leaf}$  is related to  $\delta^{13}C$  as

$$\Delta^{13}C = \frac{\delta^{13}C_{ambient} - \delta^{13}C_{leaf}}{1 + \delta^{13}C_{leaf}} \quad \text{Equation 7}$$

168 where,  $\delta^{13}C_{leaf}$  and  $\delta^{13}C_{ambient}$  are the <sup>13</sup>C/<sup>12</sup>C ratios of the leaf and the CO<sub>2</sub> in the air  
 169 surrounding the leaf, respectively (Farquhar, 1983). In C<sub>4</sub> species,  $\Delta^{13}C$  is primarily  
 170 determined by fractionations associated with CO<sub>2</sub> carboxylation and diffusion, the ratio  
 171 of bundle sheath CO<sub>2</sub> leak rate to PEP carboxylase rate (leakiness;  $\phi$ ), and  $C_i/C_a$  (Eqn 8).  
 172 Leakiness ( $\phi$ ) determines the slope of the relationship between  $\Delta^{13}C$  and  $C_i/C_a$ . Based on  
 173 this mathematical relationship, if  $\phi$  is less than 0.37, then  $\Delta^{13}C$  increases as  $C_i/C_a$   
 174 decreases, which corresponds with increasing  $\delta^{13}C_{leaf}$ . If  $\phi$  is greater than 0.37, then the  
 175 relationship reverses where  $\Delta^{13}C$  increases with  $C_i/C_a$ . In *Setaria*,  $\phi$  has been found to be

176 less than 0.37, so  $C_i/C_a$  is expected to form a negative relationship with  $\Delta^{13}\text{C}$  and positive  
177 relationship with  $\delta^{13}\text{C}_{\text{leaf}}$  (Ellsworth et al. unpublished; Kubásek *et al.*, 2007). Variation in  
178  $\phi$  across genotypes could reduce or eliminate the relationship between  $\delta^{13}\text{C}_{\text{leaf}}$  and  $\text{TE}_i$   
179 (and  $\text{WUE}_{\text{plant}}$ ). This is because differences in  $\phi$  between plants with the same  $C_i/C_a$  (and  
180 same  $\text{TE}_i$ ) would differ in carbon discrimination and  $\delta^{13}\text{C}_{\text{leaf}}$ , while other individuals that  
181 differ in  $C_i/C_a$  and  $\phi$  would have the same  $\delta^{13}\text{C}_{\text{leaf}}$ , confounding the relationship between  
182  $\delta^{13}\text{C}_{\text{leaf}}$  and  $\text{TE}_i$ . However,  $\phi$  has been shown to be relatively constant across many  $\text{C}_4$   
183 species and across environmental conditions such as light intensities, salinity, and  $\text{CO}_2$   
184 partial pressures (Ubierna *et al.*, 2011; Sun *et al.*, 2012; Bellasio, C. & Griffiths, H., 2014;  
185 Kromdijk *et al.*, 2014; Sage, 2014; Sharwood *et al.*, 2014; Sonawane *et al.*, 2017; Sonawane  
186 *et al.*, 2018).

187 The relationship of  $\Delta^{13}\text{C}$  and  $C_i/C_a$  can be defined by simplifying the relationship  
188 that was originally described by Farquhar (1984) as

$$\Delta^{13}\text{C} = a + (b_4 + \phi(b_3 - s) - a) \frac{C_i}{C_a} \quad \text{Equation 8}$$

189 where  $a$  is the fractionation during diffusion of  $\text{CO}_2$  in air through stomata (4.4 ‰),  $b_4$  is  
190 the fractionations of PEP carboxylation and the preceding isotopic equilibrium during  
191 dissolution and hydration of  $\text{CO}_2$  (-5.7 ‰ at a leaf temperature of 25 °C) as described in  
192 (Mook *et al.*, 1974; Henderson *et al.*, 1992),  $b_3$  is the Rubisco fractionation (29 ‰), and  $s$  is  
193 the fractionation during the leakage of  $\text{CO}_2$  out of the bundle sheath cells (1.8 ‰)  
194 (Henderson *et al.*, 1992; Henderson *et al.*, 1998). The  $\text{CO}_2$  concentrating mechanism in  $\text{C}_4$   
195 species reduces Rubisco isotopic discrimination against  $^{13}\text{C}$ , so that the response of  $\Delta^{13}\text{C}$   
196 (and  $\delta^{13}\text{C}_{\text{leaf}}$ ) across a gradient of  $C_i/C_a$  is dampened relative to that in  $\text{C}_3$  species (von  
197 Caemmerer *et al.*, 2014). As a result, variation in  $\delta^{13}\text{C}_{\text{leaf}}$  with respect to  $\text{TE}_i$  is related to  
198 their mutual relationship with  $C_i/C_a$ .

## 199 **Methods**

### 200 *Plant material and growth conditions*

201 An interspecific *Setaria* F7 recombinant inbred line (RIL) population comprised of  
202 189 genotypes was previously generated through a cross between the wild-type green  
203 foxtail *S. viridis* accession, A10, and the domesticated *S. italica* foxtail millet accession,  
204 B100 (Devos *et al.*, 1998; Wang *et al.*, 1998; Doust *et al.*, 2009). Seeds from this population  
205 were sowed in 10 cm diameter pots pre-filled with ~470 cm<sup>3</sup> of Metro-Mix 360 soil  
206 (Hummert, USA) and 0.5 g of Osmocote Classic 14-14-14 fertilizer (Everris, USA) and

207 placed on the Bellwether Phenotyping System using an alpha lattice design replicating  
208 each genotype and treatment combination three times. Two to three replicates per  
209 genotype, including the A10 and B10 parental accessions, per treatment (1138  
210 individuals) were transferred to the Bellwether Phenotyping System at 8 days after  
211 sowing. The experiment continued for 25 days with a photoperiod of 16 h light / 8 h  
212 night, light intensity of 500  $\mu\text{mol}/\text{m}^2/\text{s}$ , a temperature regime of 31 °C day/21 °C night  
213 and relative humidity was maintained between 40 – 80 % (Feldman *et al.*, 2018). For  
214 each replicate of each genotype, one individual plant from the well-watered treatment  
215 was grown next to a plant in the water-limited treatment. The position in the growth  
216 chamber of each paired replicates was randomly assigned and did not change during  
217 the experiment. The effect of growth chamber location was found to be negligible.

218 Plants were divided into two treatments: well-watered and water-limited, where  
219 soil water content was maintained at 100 % or 40 % of pot capacity (PC), respectively.  
220 Initially all seedlings were watered to pot capacity for the first two days at the  
221 Bellwether Foundation Phenotyping Facility at the Danforth Center (Feldman *et al.*,  
222 2017; Feldman *et al.*, 2018). After two days, the potting medium in the water-limited  
223 treatment was not watered until water content dropped to 40 % PC, at which point  
224 watering resumed. To maintain soil water content at prescribed treatment levels (well-  
225 watered 100 % PC; water-limited 40 % PC), plants were watered 2 times per day until  
226 day 26 when the plants began to be watered three times per day. At this point watering  
227 took place when the light turned on, midday, and when the lights turned off. Pots were  
228 watered by weighing them and adding water until the pot weight returned to a preset  
229 weight calculated as either 100 or 40 % PC in the well-watered and water-limited  
230 treatments, respectively, as determined by Fahlgren *et al.* (2015). Prescribed soil water  
231 content across both treatment blocks was achieved by 15 days after planting. Additional  
232 detail on the experimental design and plant growth can be found in Feldman *et al.*  
233 (2017); Feldman *et al.* (2018).

#### 234 *Measurements of biomass and transpiration*

235 RGB images of individual plants were acquired using a side view camera at four  
236 different angular rotations (0°, 90°, 180°, 270°) every other day, which was used to  
237 calculate biomass dry weight (Fahlgren *et al.*, 2015; Feldman *et al.*, 2018). Optical zoom  
238 was adjusted during the experiment to ensure optimal images for plant size  
239 measurements. Scaling factors relating pixel area to ground truth measurements were



240 used to translate pixels to relative area (pixels/cm<sup>2</sup>). The sensitivity of the measurements  
241 limited reliable measurements of plant size and transpiration to a period from day 17 to  
242 33 when plants were sufficiently large for accurate image analysis and measurements of  
243 transpiration (Feldman *et al.*, 2018). After the experiment concluded, 176 individual  
244 plants (91 plants from the 100 % FC and 85 from the 40 % FC) were randomly harvested  
245 and weighed for fresh aboveground biomass. Dry aboveground biomass was measured  
246 after drying at 60 °C for three days. The linear relationship between plant area from a  
247 side-view and dry aboveground biomass produced a goodness of fit similar to more  
248 complex models with multiple explanatory variables such as top-view plant area and  
249 plant height but did not overfit the data ( $R^2 = 0.74$ ). A loess function (default  
250 parameters) was used to smooth the data in the R stats library to interpolate  
251 aboveground dry biomass on an individual genotype within treatment (Chambers &  
252 Hastie, 1992). To avoid error propagation, all analyses were conducted on side-view  
253 plant area (in pixels), and after the analyses, side-view plant area was converted to dry  
254 aboveground biomass (Feldman *et al.*, 2018).

255         The LemnaTec instrument at the Bellwether Phenotyping Facility provided  
256 the volume of water transpired by individual plants based on gravimetric  
257 measurements and from which water use efficiency ( $WUE_{\text{plant}}$ ) was calculated. Total  
258 daily transpired water was the difference in total water added to the pot minus the total  
259 water added to empty pots on each calendar day. Empty pots were maintained in both  
260 the well-watered and water-limited treatments. Total water added was calculated as the  
261 difference between the measured pot weight and the weight of the pre-filled pot or the  
262 difference between current pot weight and the weight measurement on the previous  
263 day if no water was added. Empty pots were included in the experimental design to  
264 determine the volume of water lost through soil evaporation and to separate it from  
265 transpired water. Therefore, the cumulative transpiration on day 27 was the sum of all  
266 water transpired from day 17 until day 27. As described in (Feldman *et al.*, 2018), day 17  
267 was when the difference transpired water and soil evaporation was sufficiently large to  
268 accurately measure the volume of transpired water. On days 27-33, we were able to  
269 divide plant transpiration into daytime and nighttime components because the  
270 irrigation schedule increased from two to three daily waterings, including when the  
271 lights turned on in the morning and off at night.  $WUE_{\text{plant}}$  was calculated as the ratio of  
272 dry aboveground biomass to total water transpired.

273 *Leaf carbon stable isotopic composition ( $\delta^{13}\text{C}_{\text{leaf}}$ )*

274 As a point of reference, results for genotypic and treatment effect on traits was  
275 conductance on day 27 instead of using all days and compared to  $\delta^{13}\text{C}_{\text{leaf}}$ . The plants on  
276 day 27 were in vegetative phase and growing rapidly, typical of when physiological  
277 and gas exchange measurements would be made. Additionally, day 27 was  
278 representative in terms of QTL and other analyses conducted throughout the  
279 experiment (Feldman *et al.*, 2018). To not interrupt the experiment, the  $\delta^{13}\text{C}_{\text{leaf}}$  had to be  
280 collected from a harvested leaf at the end of the experiment (day 34). The leaf collected  
281 for  $\delta^{13}\text{C}_{\text{leaf}}$  was the youngest, uppermost, fully expanded leaf, which is the same age and  
282 development as a leaf that would have been collected on day 27 if that had been  
283 possible.

284 The leaves were dried at 60 °C for three days, and then 8-12 discs, having a total  
285 leaf area of 0.47 – 0.71 cm<sup>2</sup>, were sampled from each leaf and placed in tin capsules for  
286 stable isotopic analysis. A comparison of  $\delta^{13}\text{C}_{\text{leaf}}$  from sampling leaf discs versus  
287 sampling an aliquot of the completely homogenized powdered leaf tissue was made on a  
288 subset of 47 leaves. The slope of  $\delta^{13}\text{C}_{\text{leaf}}$  from the punches regressed against  $\delta^{13}\text{C}_{\text{leaf}}$  from  
289 the ground leaf tissue was  $0.93 \pm 0.03$  ( $R^2 = 0.96$ ; Fig. S1), and the mean difference  
290 between methods was  $0.06 \pm 0.04$  ‰, which was similar to the IRMS precision for  
291 carbon stable isotope analysis and substantially less than the sample standard deviation  
292 of 0.5 ‰. Considering the similarity between sampling methods, all leaves were  
293 sampled using the more rapid leaf disc method.

294 Leaf tissue was converted to CO<sub>2</sub> with an elemental analyzer (ECS 4010, Costech  
295 Analytical, Valencia, CA) and analyzed with a continuous flow isotope ratio mass  
296 spectrometer (Delta PlusXP, ThermoFinnigan, Bremen; Brenna *et al.*, 1997; Qi *et al.*,  
297 2003). The Santrock correction was used by the IRMS software to correct for <sup>17</sup>O  
298 (Santrock *et al.*, 1985). Final  $\delta$  values were the mean of 5 sample peaks calibrated to the  
299 international standards NBS 19, RM 8542, and IAEA-CO-9 to calculate  $\delta^{13}\text{C}$  relative to  
300 Vienna Peedee belemite (V-PDB). Quality control standards were also included to  
301 determine the correction quality. Overall standard deviation for  $\delta^{13}\text{C}$  values was 0.07  
302 ‰.

303 The stable isotope composition of carbon ( $\delta^{13}\text{C}_{\text{leaf}}$ ) was reported in  $\delta$  notation,

$$\delta = \left( \frac{R_{sample}}{R_{standard}} - 1 \right) \quad \text{Equation 9}$$

304 where  $R_{sample}$  and  $R_{standard}$  is the isotopic ratios of carbon ( $^{13}\text{C}/^{12}\text{C}$ ) of the sample and  
305 international standard, respectively. The international standard used for oxygen was  
306 Vienna- PeeDee Belemite (VPDB).

### 307 *QTL analysis*

308 The same methods used in Feldman *et al.* (2017); Feldman *et al.* (2018) were  
309 used in this study, and here the methods used are repeated. QTL mapping was  
310 performed on day 27 within each treatment group using functions in the R/qlt and  
311 funqtl packages (Kwak *et al.*, 2016). The functions were called by a set of custom  
312 Python and R scripts ([https://github.com/maxjfeldman/foxy\\_qtl\\_pipeline](https://github.com/maxjfeldman/foxy_qtl_pipeline)). Two  
313 complimentary analysis methods were utilized. First, a single QTL model genome  
314 scan using Haley-Knott regression was performed to identify QTL exhibiting LOD  
315 score peaks greater than a permutation-based significance threshold ( $\alpha = 0.05$ ,  $n =$   
316 1000). Second, a stepwise forward/backward selection procedure was used to  
317 identify an additive, multiple QTL model based upon maximization of penalized  
318 LOD score.

319 The function-valued approach described by Kwak *et al.* (2016) was used to  
320 identify QTL associated with the average (SLOD) and maximum (MLOD) score at  
321 each locus throughout the experiment. Each genotypic mean trait within treatments  
322 was estimated using loess smoothing, and the QTL significance threshold was  
323 determined based upon the permutation-based likelihood of observing the empirical  
324 SLOD or MLOD test statistic. Separate, independent linkage mapping analysis  
325 performed at each time point identified a larger number of QTL locations relative to  
326 similar function-valued analysis based on the SLOD and MLOD statistics calculated  
327 at each marker. After refinement of QTL position estimates, the significance of fit for  
328 the full multiple QTL model was assessed using type III ANOVA. The contribution  
329 of individual loci was assessed using drop-one-term, type III ANOVA. The absolute  
330 and relative allelic effect sizes were determined by comparing the fit of the full  
331 model to a sub-model with one of the terms removed. QTL were grouped by finding  
332 the largest QTL by proportional variance explained and combining all QTL within  
333 10 cM of it, then this was done for the next largest QTL and so on until all QTL were  
334 accounted for. All putative protein-coding genes (*Setaria viridis* genome version 1.1)

335 found within a 1.5-logarithm of the odds (LOD) confidence interval were reported  
336 for each QTL in Feldman *et al.* (2018), which includes all QTL found in this study as  
337 well. Epistasis between QTL was evaluated using the same method as in Feldman *et*  
338 *al.* (2018) and Feldman *et al.* (2017) by comparing the log<sub>10</sub> likelihood ratio of a  
339 model describing the additive effect and the additive interaction between two QTL  
340 with a model only containing the additive interaction between the two QTL. The  
341 significance threshold was determined through permutation ( $\alpha = 0.05$ ,  $n = 100$ ).

#### 342 *Statistical analysis*

343 Statistical analyses were conducted in R version 3.4.0 (R Team R\_Core\_Team,  
344 2013). Homogeneity was tested based on plotting predicted fit versus residuals. Using  
345 the extRemes package (version 2.0-8), normality was tested by plotting residuals on  
346 quantiles-quantiles plots. Within treatment comparisons were made on each trait using  
347 a two-factor analysis of variance (ANOVA) where the factors were treatment and  
348 genotype. Broad-sense heritability was calculated the proportion of total variance of a  
349 trait is attributed to genotypic variation ( $H^2 = \sigma_{genotypic}^2 / \sigma_{total}^2$ ). Using lmodel2 (version  
350 1.7-2) package, model II regression analysis (standard major axis) were used instead of  
351 ordinary least squares regression for all linear regressions because neither variable was  
352 controlled, both varied naturally with their own associated error, and the physical units  
353 of both variables were not the same. Two-way ANOVAs were used to determine if the  
354 effect of treatment and genotype on each trait was significant.

## 355 **Results**

### 356 *Dry biomass, transpiration, and WUE<sub>plant</sub> traits*

357 Whole plant biomass accumulation and total transpiration were analyzed  
358 throughout the experiment, and their relationship remained relatively constant through  
359 time (Fig. S1; Feldman *et al.*, 2018). We selected day 27 for our analysis when all  
360 genotypes were in the vegetative stage. On this day, dry biomass estimated from side  
361 view images and validated with final harvest biomass (Feldman *et al.*, 2018) varied  
362 significantly across genotypes from 0.1 to 8.33 g and 0.11 to 3.75 g in the well-watered  
363 and water-limited treatments, respectively. Cumulative transpiration ranged from 0 to  
364 1470 ml in the well-watered and 0 to 379 ml in water-limited plants. There was a  
365 significant difference in dry biomass and transpiration rates between genotypes in both  
366 irrigation treatments and genotype x treatment effects (Fig. 1; Table 1), and across  
367 genotypes the water-limited treatment significantly reduced dry biomass and

368 transpiration by 54 and 72 %, respectively (Table 1). The ratio of dry biomass relative to  
369 the amount of total transpiration ( $WUE_{\text{plant}}$ ) was 58 % higher in the water-limited  
370 treatment and ranged across genotypes from 4.76 to 32.4 (g/L) in the well-watered  
371 treatment and 6.1 to 72.34 (g/L) in the water-limited treatment, respectively (Fig. 1;  
372 Table 1). Total transpiration was divided into daytime ( $T_{\text{day}}$ ) and nighttime ( $T_{\text{night}}$ )  
373 components, where  $T_{\text{day}}$  and  $T_{\text{night}}$  ranged from 5 to 141 and 0 to 42 in the well-watered  
374 treatment, respectively and 2 to 69 and 0 to 30 in the water-limited treatment,  
375 respectively (Table 1). Leaf N and C and C:N ratio were also measured and analyzed  
376 (Table S1 and Table S2).

377 *Broad-sense heritability, proportional variance and leaf carbon isotopic composition ( $\delta^{13}\text{C}_{\text{leaf}}$ )*

378 In all traits, 15 - 72 % of the variance in the experiment was explained by the  
379 treatment effect (Table 2). Additionally, in all traits, the variance ascribed to the  
380 genotype effect was relatively small but substantial given the large influence that the  
381 water limitation treatment had on these traits.

382 Broad-sense heritability ( $H^2$ ) was relatively robust for all traits, including  $\delta^{13}\text{C}_{\text{leaf}}$ ,  
383 in at least one treatment or when treatments were combined (Table 2). For example,  
384  $\delta^{13}\text{C}_{\text{leaf}}$  was significantly heritable in the well-watered treatment (0.49) but not in the  
385 water-limited treatment (0.04), which was also the case with  $WUE_{\text{plant}}$  (0.19 and 0.02 in  
386 well-watered and water-limited, respectively). In all traits, the well-watered treatment  
387 had higher  $H^2$  than the water-limited treatment.  $T_{\text{night}}$  had low  $H^2$  values for both  
388 treatments (0.1 and 0.0 in well-watered and water-limited, respectively) that limited its  
389 strength in QTL analysis but  $H^2$  was high when both treatments combined (0.43).

390 The  $\delta^{13}\text{C}_{\text{leaf}}$  values ranged from -14.7 to -12.4 ‰ in the well-watered and -15.6 to -  
391 13.2 ‰ in the water-limited treatment, with significant differences across genotypes  
392 (Fig. 2; Table 1). The water-limited treatment significantly reduced  $\delta^{13}\text{C}_{\text{leaf}}$  on average  
393 across genotypes by  $0.82 \pm 0.04$  ‰ (Table 1).

394 *Correlation of traits with  $\delta^{13}\text{C}_{\text{leaf}}$*

395 Over the time course of the experiment, the correlations of  $\delta^{13}\text{C}_{\text{leaf}}$  with dry  
396 biomass, transpiration,  $WUE_{\text{plant}}$ ,  $T_{\text{day}}$ , and  $T_{\text{night}}$  were relatively constant over much of  
397 the experiment, and correlations were only lower in the beginning and end of the  
398 experiment (Fig. 2). At the midpoint of the experiment (day 27), correlations with  $\delta^{13}\text{C}_{\text{leaf}}$   
399 were similar in magnitude to most days of the experiment (Fig. S2, S3, S4, S5, S6).

400 These correlations were stronger across treatments than within treatment, yet they were  
401 significant under the well-watered conditions (Fig. 2). On day 27, the correlation  
402 coefficients of  $\delta^{13}\text{C}_{\text{leaf}}$  with biomass, transpiration,  $T_{\text{day}}$ , and  $T_{\text{night}}$  were between 0.52 and  
403 0.69 in magnitude across treatments and 0.25 to 0.42 for well-watered treatment (Fig. 3).  
404 In the water-limited, correlations were low for all traits, with magnitudes ranging from  
405 -0.14 to 0.04 (Fig. 3). On day 27,  $\text{WUE}_{\text{plant}}$  was negatively correlated with  $\delta^{13}\text{C}_{\text{leaf}}$  with  
406 values of -0.60, -0.47, and -0.14 for both treatments combined, well-watered, and water-  
407 limited treatments, respectively.

#### 408 *QTL analysis and contributions of allele composition on traits*

409 Three QTL (chr. 7@51 centimorgans (cM), chr. 7@99 cM and chr. 9@34 cM)  
410 associated with  $\delta^{13}\text{C}_{\text{leaf}}$  were found in the well-watered treatment, but none were  
411 detected in the water-limited treatment (Table 3). For simplicity, QTL were identified by  
412 their genomic position of the marker based on genetic linkage in centimorgans (cM) and  
413 was given the nomenclature of 'chromosome @ centimorgans'. No significant epistatic  
414 interaction between QTL was detected (Table S3). Two of these QTL (7@99, 9@34) co-  
415 localized with  $\text{WUE}_{\text{plant}}$ , dry biomass, transpiration, and  $T_{\text{day}}$  in both treatments on day  
416 27. This pattern of co-localization of these two QTL is consistent over much of the  
417 experiment. QTL 7@51 was co-localized with cumulative transpiration and  $T_{\text{night}}$  in the  
418 well-watered treatment. Dry biomass was described in Feldman *et al.* (2018) as having  
419 this genetic architecture from days 17 through 33 (Table 3; S4). Having an allele from  
420 parental accession A10 (*S. viridis*) at two of the three loci (7@51 and 7@99) increased  
421  $\delta^{13}\text{C}_{\text{leaf}}$  in the well-watered treatment, while an allele from parental line B100 (*S. italica*)  
422 increased  $\delta^{13}\text{C}_{\text{leaf}}$  at 9@34 in both treatments (Fig. S8).

423 At each marker two alleles are possible, either the allele from the parental line  
424 A10 accession of *S. viridis* (A) or the allele from the other parent, B100 accession of *S.*  
425 *italica* (B). The RILs in the experiment were categorized in allele classes by combining  
426 the allele (represented by letters A or B) for the three QTL associated with  $\delta^{13}\text{C}_{\text{leaf}}$  (in the  
427 following order: 7@51, 7@99, 9@34). The seven allele classes present in this population  
428 were AAA, AAB, ABB, BAA, BAB, BBA, and BBB, but allele class ABA was not present.  
429 For six of the seven allele classes, the SMA linear regression between dry biomass and  
430 transpiration was significant (Table 4; Fig. 4a). Furthermore, the regression of  $\delta^{13}\text{C}_{\text{leaf}}$   
431 against the slopes of dry biomass versus transpiration showed a strong negative  
432 relationship for both the well-watered ( $\delta^{13}\text{C}_{\text{leaf}}$  = -0.146 slope - 12.27;  $R^2 = 0.88$ ;  $P = 0.006$ )

433 and in the water-limited treatments ( $\delta^{13}\text{C}_{\text{leaf}} = -0.0358 \text{ slope} - 13.89$ ;  $R^2 = 0.92$ ,  $P = 0.0007$ ;  
434 Fig. 4b). Although this relationship was dampened in the water-limited treatment, it  
435 followed a similar trend (Fig. 4b). Additionally, the order that the allele classes were  
436 positioned along the  $\delta^{13}\text{C}_{\text{leaf}}$  versus slope regression is very similar between treatments.  
437 In the well-watered treatment, the QTL 7@99 (represented by the second letter in three-  
438 letter allele class names) appears to have the greatest influence on this relationship,  
439 where the A10 allele was associated with a reduced slope and enriched  $\delta^{13}\text{C}_{\text{leaf}}$  (Fig. 4b).  
440 Alternatively, in the water-limited treatment, the effect of QTL 7@99 on this relationship  
441 was reduced relative to the well-watered treatment. Additionally, in both treatments  
442 the mean dry biomass and transpiration for each of these allele classes had a strong  
443 significant positive relationship with  $\delta^{13}\text{C}_{\text{leaf}}$  (Fig. 5a and Fig. 5b). Similar to the  
444 transpiration versus  $\delta^{13}\text{C}_{\text{leaf}}$ ,  $T_{\text{day}}$  and  $T_{\text{night}}$  formed significant relationships with  $\delta^{13}\text{C}_{\text{leaf}}$ ,  
445 but  $T_{\text{night}}$  formed a weaker relationship with  $\delta^{13}\text{C}_{\text{leaf}}$  (Fig. 6a and Fig. 6b).

## 446 Discussion

447 Leaf carbon isotope composition ( $\delta^{13}\text{C}_{\text{leaf}}$ ) has been theoretically related to  $\text{TE}_i$   
448 ( $A_{\text{net}}/g_s$ ) for both  $\text{C}_3$  and  $\text{C}_4$  species (Farquhar & Richards, 1984; Condon *et al.*, 1987;  
449 Henderson *et al.*, 1998; Condon *et al.*, 2002; Condon *et al.*, 2004). Despite the potential  
450 dampening effect that the  $\text{CO}_2$ -concentrating mechanism has on  $\delta^{13}\text{C}_{\text{leaf}}$  variability in  $\text{C}_4$   
451 plants (von Caemmerer *et al.*, 2014),  $\delta^{13}\text{C}_{\text{leaf}}$  in the *Setaria* RIL population presented here  
452 exhibited a significant genetic (range of 2.4 ‰) and environmental (mean difference of  
453  $0.82 \pm 0.04$  ‰ between treatments) effect. These results also show considerable genotype  
454 by treatment response, consistent with previous studies of well-watered and water-  
455 limited  $\text{C}_4$  plants (Monneveux *et al.*, 2007; Cabrera-Bosquet, Llorenç *et al.*, 2009;  
456 Ellsworth *et al.*, 2017). In the well-watered treatment, the  $\delta^{13}\text{C}_{\text{leaf}}$  had relatively strong  
457 correlations with  $\text{WUE}_{\text{plant}}$  and its component traits, biomass and transpiration. These  
458 correlations were consistent throughout much of the experiment and corroborate the  
459 theoretical relationship between  $\delta^{13}\text{C}_{\text{leaf}}$  and  $\text{WUE}_{\text{plant}}$  through  $\text{TE}_i$ . However, in the  
460 water-limited plants the lack of significant correlations between  $\delta^{13}\text{C}_{\text{leaf}}$  and other traits  
461 (e.g.  $\text{WUE}_{\text{plant}}$ , biomass, and transpiration) was likely due to restricted stomatal  
462 conductance ( $g_s$ ) across most genotypes, minimizing individual differences in  $\text{TE}_i$ ,  
463 similar to what was found in  $\text{C}_3$  species (Lambrides *et al.*, 2004; Adiredjo *et al.*, 2014).

464 These data demonstrate a significant genetic and environmental influence on  
465  $\delta^{13}\text{C}_{\text{leaf}}$  in a  $\text{C}_4$  species related to differences in  $\text{WUE}_{\text{plant}}$ . These relationships are further

466 supported by the fact that  $\delta^{13}\text{C}_{\text{leaf}}$  shared a similar genetic architecture with  $\text{WUE}_{\text{plant}}$  and  
467 its component traits. For example, QTL (7@51, 7@99, 9@33) found for  $\delta^{13}\text{C}_{\text{leaf}}$  are  
468 pleiotropic loci, co-localized with leaf composition traits and whole plant traits such as  
469 biomass production, transpiration, and  $\text{WUE}_{\text{plant}}$ . In the current study,  $\text{WUE}_{\text{plant}}$  was  
470 calculated differently from Feldman *et al.* (2018); however, the principal QTL for  
471  $\text{WUE}_{\text{plant}}$  and its component traits remained similar between studies. The one notable  
472 difference was that the most significant QTL for  $\text{WUE}_{\text{plant}}$  calculated with transpiration  
473 (T) instead of ET shifted to 7@99 and 9@33. This highlights the apparent importance of  
474 using T in linking  $\delta^{13}\text{C}_{\text{leaf}}$  to  $\text{WUE}_{\text{plant}}$ . This rationale is supported by theories describing  
475 the relationship between  $\text{WUE}_{\text{plant}}$  and  $\delta^{13}\text{C}_{\text{leaf}}$ , suggesting that in this RIL population  $\text{TE}_i$   
476 has a greater influence on  $\text{WUE}_{\text{plant}}$  than the other components  $\phi_w$ ,  $\phi_c$ , and  $r$  described in  
477 Theory section.

478 An additional trait that might influence the relationship between  $\delta^{13}\text{C}_{\text{leaf}}$  and  
479  $\text{WUE}_{\text{plant}}$  is bundle sheath leakiness ( $\phi$ ), where  $\phi$  is defined as the ratio of bundle sheath  
480  $\text{CO}_2$  leak rate to the rate of PEP carboxylase. Changes in  $\phi$  influence the relationship  
481 between  $\Delta^{13}\text{C}_{\text{leaf}}$  and  $\text{CO}_2$  availability ( $C_i/C_a$ ) such that differences in  $\delta^{13}\text{C}_{\text{leaf}}$  can result  
482 from variation in  $\phi$  instead of  $\text{TE}_i$ . However, in this experiment it is unlikely that  $\phi$  is  
483 the primary driver of  $\delta^{13}\text{C}_{\text{leaf}}$ . First,  $\phi$  would have to be heritable to explain the genotypic  
484 effect in  $\delta^{13}\text{C}_{\text{leaf}}$ . Although this is possible there are no studies, that we are aware of,  
485 showing  $\phi$  as heritable and under genetic control. Second, the consistent depletion in  
486  $\delta^{13}\text{C}_{\text{leaf}}$  in response to water limitation could occur if  $\phi$  increased across all genotypes in  
487 the water-limited treatment. However, several studies have failed to find significant  
488 differences in  $\phi$  under various environmental growth conditions including light  
489 gradients, salinity, and water limitation across species (Ubierna *et al.*, 2011; Bellasio,  
490 Chandra & Griffiths, Howard, 2014a; Bellasio, Chandra & Griffiths, Howard, 2014b;  
491 Bellasio, C. & Griffiths, H., 2014; Sharwood *et al.*, 2014; Sonawane *et al.*, 2017; Sonawane  
492 *et al.*, 2018; Sonawane and Cousins unpublished results). Third,  $\phi$ -driven variation in  
493  $\delta^{13}\text{C}_{\text{leaf}}$  cannot explain the strong negative correlation between  $\delta^{13}\text{C}_{\text{leaf}}$  and  $\text{WUE}_{\text{plant}}$   
494 because increasing  $\phi$  decreases the efficiency of the carbon-concentrating mechanism  
495 through overcycling (von Caemmerer *et al.*, 2014). This would decrease the  
496 photosynthetic efficiency, which, in turn, decreases  $\text{TE}_i$  and  $\text{WUE}_{\text{plant}}$ . Finally, the similar  
497 genetic architecture between  $\delta^{13}\text{C}_{\text{leaf}}$  and  $\text{WUE}_{\text{plant}}$ , biomass and transpiration would not  
498 be expected if the variation in  $\delta^{13}\text{C}_{\text{leaf}}$  was driven primarily by  $\phi$  but rather  $\text{TE}_i$ .  
499 Therefore, variation in  $\phi$  across individual plants could certainly contribute to  $\delta^{13}\text{C}_{\text{leaf}}$ ,



500 potentially reducing the strength of the relationship between  $\delta^{13}\text{C}_{\text{leaf}}$  and  $\text{WUE}_{\text{plant}}$ .  
501 Nonetheless, in this experiment there was a strong relationship between  $\delta^{13}\text{C}_{\text{leaf}}$  and  
502  $\text{WUE}_{\text{plant}}$  and its component traits.

503 Theoretical and empirical experiments indicate that  $\delta^{13}\text{C}_{\text{leaf}}$  and  $\text{TE}_i$  should be  
504 negatively correlated (Farquhar, 1983; Henderson *et al.*, 1998; von Caemmerer *et al.*,  
505 2014; Ellsworth *et al.*, 2017). Therefore, if  $\text{TE}_i$  is a strong component of  $\text{WUE}_{\text{plant}}$ , then  
506 there should also be a negative relationship between  $\delta^{13}\text{C}_{\text{leaf}}$  and  $\text{WUE}_{\text{plant}}$ , as seen in the  
507 data presented here. In this RIL population there was a stronger relationship of  $\delta^{13}\text{C}_{\text{leaf}}$   
508 and  $\text{WUE}_{\text{plant}}$  across allele classes based on the three QTL for  $\delta^{13}\text{C}_{\text{leaf}}$ . The strong negative  
509 relationship between  $\delta^{13}\text{C}_{\text{leaf}}$  and  $\text{WUE}_{\text{plant}}$  across these allele classes further supports the  
510 link of  $\text{TE}_i$  between  $\delta^{13}\text{C}_{\text{leaf}}$  and  $\text{WUE}_{\text{plant}}$ . Across these allele classes, the relationship of  
511  $\delta^{13}\text{C}_{\text{leaf}}$  and  $\text{WUE}_{\text{plant}}$  is also seen in the water-limited treatment even though there were  
512 no QTL detected for  $\delta^{13}\text{C}_{\text{leaf}}$  under this treatment. This is likely due to the dampened  
513 response of  $\delta^{13}\text{C}_{\text{leaf}}$  to water-limited conditions as seen with previous studies (Avramova  
514 *et al.*, 2018). However, given that the water limitation did not remove the underlying  
515 relationship between  $\text{TE}_i$  and  $\text{WUE}_{\text{plant}}$ , the inability to detect QTL is likely due to the  
516 reduced variation in  $\delta^{13}\text{C}_{\text{leaf}}$ , which reduced the magnitude of the genotypic response  
517 and decreased the signal to noise ratio. Nonetheless, the basic relationship between  
518  $\delta^{13}\text{C}_{\text{leaf}}$  and  $\text{WUE}_{\text{plant}}$  remained in the water-limited treatment, as did the relative order of  
519 the allele classes. For example, under both well-watered and water-limited conditions  
520 the allele classes AAB and BAB had the lowest  $\text{WUE}_{\text{plant}}$  and most enriched  $\delta^{13}\text{C}_{\text{leaf}}$ .  
521 Whereas allele classes AAA and BAA were in the middle in both traits, and allele  
522 classes BBB and BBA had the highest  $\text{WUE}_{\text{plant}}$  and most depleted  $\delta^{13}\text{C}_{\text{leaf}}$  under both  
523 treatments. This trend indicates a strong allelic effect on relationship between  $\delta^{13}\text{C}_{\text{leaf}}$ ,  
524  $\text{TE}_i$ , and  $\text{WUE}_{\text{plant}}$  that may allow  $\delta^{13}\text{C}_{\text{leaf}}$  to be used as a proxy for  $\text{TE}_i$ ,  $\text{WUE}_{\text{plant}}$  in well-  
525 watered and water-limited conditions.

## 526 *Conclusion*

527  $\text{WUE}_{\text{plant}}$  is driven by a balance between carbon assimilation and water lost via  
528 stomates ( $\text{TE}_i$ ) and other whole plant processes such as  $\phi_c$ ,  $\phi_w$ , and  $r$  (when only  
529 aboveground biomass is measured). Hence, the relationship between  $\delta^{13}\text{C}_{\text{leaf}}$  and  
530  $\text{WUE}_{\text{plant}}$  is only apparent if  $\text{TE}_i$  has a strong influence on  $\text{WUE}_{\text{plant}}$ . In this  $\text{C}_4$  grass RIL  
531 population,  $\delta^{13}\text{C}_{\text{leaf}}$  showed a significant and consistent response to water limitation,  
532 significant genotypic variation, and significant heritability. Additionally,  $\delta^{13}\text{C}_{\text{leaf}}$

533 correlated with transpiration, biomass, and  $WUE_{\text{plant}}$ , suggesting a physiological  
534 relationship among these traits. This is further supported by the fact that there were  
535 even stronger negative correlations between  $\delta^{13}\text{C}_{\text{leaf}}$  and  $WUE_{\text{plant}}$  within the allele  
536 classes defined by QTL of  $\delta^{13}\text{C}_{\text{leaf}}$ . This suggests that differences in  $TE_i$  is driving the  
537 differences in both  $WUE_{\text{plant}}$  and  $\delta^{13}\text{C}_{\text{leaf}}$ . This relationship between  $\delta^{13}\text{C}_{\text{leaf}}$  and  $WUE_{\text{plant}}$   
538 across allele classes emphasizes the intrinsic role of  $TE_i$  in this relationship and implies  
539 that  $\delta^{13}\text{C}_{\text{leaf}}$  can detect variation in  $WUE_{\text{plant}}$  when  $TE_i$  is a major driver of  $WUE_{\text{plant}}$ . The  
540 outcome of this research demonstrates that  $\delta^{13}\text{C}_{\text{leaf}}$  has the potential to screen for  $TE_i$  in a  
541 marker-assisted  $C_4$  plant breeding program. However, additional work is needed to  
542 better understand the genetic controls of  $\delta^{13}\text{C}_{\text{leaf}}$ ,  $TE_i$  and  $WUE_{\text{plant}}$ . Furthermore,  
543 research is needed to explore the use of  $\delta^{13}\text{C}_{\text{leaf}}$  in other  $C_4$  species and under field  
544 settings to better understand the complex interaction of traits and causal genes that  
545 influence  $WUE_{\text{plant}}$ ,  $TE_i$ , and  $\delta^{13}\text{C}_{\text{leaf}}$ .

#### 546 **Acknowledgements**

547 This project was funded by U.S. Department of Energy (award number DE-SC0008769)  
548 to ABC and IB. ABC is supported in part by Meyer Distinguished Professorship. IB was  
549 supported by the US Department of Agriculture – Agricultural Research Service.

550

#### 551 **Author contributions**

552 M.F. and I.B. performed the experiment; P.E and M.F. analyzed the results; P.E. wrote  
553 the manuscript; M.F., A.C., and I.B. contributed to the development and writing of the  
554 manuscript.

## Appendix I Glossary of terms

---

| <b>Term</b>                            | <b>Definition</b>                                                                                                                                     |
|----------------------------------------|-------------------------------------------------------------------------------------------------------------------------------------------------------|
| $\Delta^{13}\text{C}$                  | Photosynthetic carbon discrimination ( $\delta^{13}\text{C}_{\text{ambient}} - \delta^{13}\text{C}_{\text{leaf}}$ )                                   |
| $\delta^{13}\text{C}_{\text{leaf}}$    | Leaf carbon isotopic composition (‰)                                                                                                                  |
| $\delta^{13}\text{C}_{\text{ambient}}$ | Isotopic composition of ambient $\text{CO}_2$ (‰)                                                                                                     |
| $\text{WUE}_{\text{ag}}$               | Agricultural water use efficiency (crop yield/water applied to crop)                                                                                  |
| $\text{WUE}_{\text{plant}}$            | Ratio of biomass accumulated per water transpired                                                                                                     |
| $\text{TE}_i$                          | Intrinsic transpiration efficiency ( $A_{\text{net}}/g_s$ )                                                                                           |
| HI                                     | Harvestable index                                                                                                                                     |
| $C_i/C_a$                              | Intercellular to ambient $\text{CO}_2$ concentration                                                                                                  |
| $g_s$                                  | Stomatal conductance                                                                                                                                  |
| $A_{\text{net}}$                       | Net photosynthetic rate                                                                                                                               |
| $T$                                    | Transpiration rate                                                                                                                                    |
| ET                                     | Evapotranspiration                                                                                                                                    |
| $V$                                    | Evaporative demand; ( $e_i - e_a$ )                                                                                                                   |
| $e_i - e_a$                            | Water vapor molar difference between intercellular and ambient air at leaf temperature                                                                |
| $\phi_w$                               | Proportion of water used by plant that is unproductive water loss (e.g. nighttime and cuticular transpiration)                                        |
| $\phi_c$                               | Proportion of fixed carbon lost through respiration                                                                                                   |
| $R$                                    | Proportion of biomass                                                                                                                                 |
| $A$                                    | Fractionation during diffusion of $\text{CO}_2$ in air through stomata (4.4 ‰)                                                                        |
| $T_{\text{day}}$                       | Daytime transpiration (ml)                                                                                                                            |
| $T_{\text{night}}$                     | Nighttime transpiration (ml)                                                                                                                          |
| $b_3$                                  | Fractionation by Rubisco (30 ‰)                                                                                                                       |
| $b_4$                                  | Fractionation of PEP carboxylation and isotopic equilibrium during dissolution and hydration of $\text{CO}_2$ (-5.2 ‰ at a leaf temperature of 30 °C) |
| $S$                                    | Fractionation during the $\text{CO}_2$ leakage from the bundle sheath cells (1.8 ‰)                                                                   |
| $\Phi$                                 | Leakiness of $\text{CO}_2$ from the bundle sheath                                                                                                     |
| $H^2$                                  | Broad sense heritability                                                                                                                              |

---

**Table 1** Analysis of variance of traits.

| Trait                      | Treatment block   |        |        |                   |        |        | Treatment              |        | Genotype                 |        | Treatment x Genotype     |        |
|----------------------------|-------------------|--------|--------|-------------------|--------|--------|------------------------|--------|--------------------------|--------|--------------------------|--------|
|                            | Well-watered      |        |        | Water-limited     |        |        | $F_{ddf,ndf}$          | $P$    | $F_{ddf,ndf}$            | $P$    | $F_{ddf,ndf}$            | $P$    |
|                            | Mean $\pm$ SE     | Min    | Max    | Mean $\pm$ SE     | Min    | Max    |                        |        |                          |        |                          |        |
| Dry biomass (g)            | 4.91 $\pm$ 0.07   | 0.10   | 8.83   | 2.21 $\pm$ 0.02   | 0.11   | 3.75   | 4968 <sub>1,742</sub>  | <0.001 | 15.70 <sub>188,742</sub> | <0.001 | 5.71 <sub>182,742</sub>  | <0.001 |
| Transpiration (ml)         | 565.3 $\pm$ 11.9  | 0.10   | 1470   | 159.5 $\pm$ 3.0   | 0.0    | 379.0  | 2779 <sub>1,764</sub>  | <0.001 | 7.468 <sub>189,764</sub> | <0.001 | 3.739 <sub>183,764</sub> | <0.001 |
| $T_{day}$ (ml)             | 74.8 $\pm$ 1.0    | 5.0    | 141.0  | 31.9 $\pm$ 0.5    | 2.0    | 69.0   | 2692 <sub>1,764</sub>  | <0.001 | 5.398 <sub>189,764</sub> | <0.001 | 1.745 <sub>183,764</sub> | <0.001 |
| $T_{night}$ (ml)           | 13.3 $\pm$ 0.3    | 0      | 42.0   | 6.8 $\pm$ 0.2     | 0      | 30.0   | 290.8 <sub>1,760</sub> | <0.001 | 1.632 <sub>189,760</sub> | <0.001 | 0.393 <sub>183,760</sub> | 1.00   |
| WUE <sub>plant</sub> (g/L) | 9.60 $\pm$ 0.14   | 4.76   | 32.40  | 15.14 $\pm$ 0.25  | 6.06   | 72.34  | 515.8 <sub>1,744</sub> | <0.001 | 6.613 <sub>188,744</sub> | <0.001 | 1.063 <sub>182,744</sub> | 0.29   |
| $\delta^{13}C_{leaf}$ (‰)  | -13.50 $\pm$ 0.50 | -14.86 | -12.24 | -14.33 $\pm$ 0.55 | -15.99 | -12.74 | 569 <sub>1,351</sub>   | <0.001 | 2.054 <sub>184,351</sub> | <0.001 | 1.003 <sub>175,351</sub> | 0.49   |

Means  $\pm$  SD of fresh biomass, transpiration, WUE<sub>plant</sub> were determined on day 27.  $\delta^{13}C_{leaf}$  was collected at the end of the experiment on day 34.  $T_{day}$  and  $T_{night}$  are daily values for day 27, which was the first day that total transpiration could be separated into nighttime and daytime components.

**Table 2** Proportional variance and broad-sense heritability ( $H^2$ ) of traits on day 27 after sowing.  $\delta^{13}\text{C}_{\text{leaf}}$  was collected at the end of the experiment. Transpiration is cumulative transpiration throughout the experiment, while  $T_{\text{day}}$  and  $T_{\text{night}}$  are daily volumes on day 27.

| Trait                               | Proportional variance |           |               | $H^2$           |                        |                         |
|-------------------------------------|-----------------------|-----------|---------------|-----------------|------------------------|-------------------------|
|                                     | Genotype              | Treatment | G x Treatment | Both treatments | Well-watered treatment | Water-limited treatment |
| Dry biomass                         | 0.14                  | 0.67      | 0.11          | 0.65            | 0.78                   | 0.68                    |
| Transpiration                       | 0.11                  | 0.65      | 0.11          | 0.57            | 0.62                   | 0.39                    |
| $T_{\text{night}}$                  | 0.09                  | 0.72      | 0.04          | 0.43            | 0.10                   | 0.00                    |
| $T_{\text{day}}$                    | 0.08                  | 0.34      | 0.00          | 0.67            | 0.51                   | 0.21                    |
| $\text{WUE}_{\text{plant}}$         | 0.04                  | 0.15      | 0.00          | 0.20            | 0.19                   | 0.02                    |
| $\delta^{13}\text{C}_{\text{leaf}}$ | 0.09                  | 0.55      | 0.01          | 0.45            | 0.49                   | 0.04                    |

Table 3. QTL found across all traits in both treatments that are co-localized in two or more traits. Colored cell represents at least one significant QTL found in the experiment.

| Trait                       | Treatment     | Genomic position of QTL |       |      |      |       |       |      |      |       |      |       |       |
|-----------------------------|---------------|-------------------------|-------|------|------|-------|-------|------|------|-------|------|-------|-------|
|                             |               | 2@92                    | 2@113 | 3@49 | 4@50 | 5@79  | 5@104 | 6@59 | 6@75 | 7@33  | 7@51 | 7@99  | 9@34  |
| Dry biomass                 | well-watered  | 16.6                    | 11.0  | 5.4  |      | -9.4  | -11.2 | 4.7  | 5.6  | -4.5  | -6.9 | -9.4  | 9.2   |
|                             | water-limited | 11.4                    |       |      | 11.7 | -8.0  | -8.3  |      |      |       | -7.3 | -6.8  | 18.3  |
| Cumulative transpiration    | well-watered  | 13.3                    |       | 5.7  |      |       | -8.7  | 4.2  |      | -4.7  | -5.9 | -10.0 | 16.1  |
|                             | water-limited | 8.7                     |       |      | 8.6  |       | -7.0  |      |      |       |      | -11.2 | 22.5  |
| $T_{\text{night}}$          | well-watered  |                         |       |      |      |       |       | 5.6  |      | -10.5 |      | 10.9  |       |
|                             | water-limited |                         |       |      |      |       |       |      |      |       |      | 9.7   |       |
| $T_{\text{day}}$            | well-watered  | 10.7                    | 8.8   |      |      | -6.5  | -5.0  | 4.4  |      | -6.9  | -9.0 | 15.9  |       |
|                             | water-limited |                         |       |      | 5.7  |       | -9.8  | 4.6  |      |       | -6.2 | 20.7  |       |
| $\delta^{13}\text{C}$       | well-watered  |                         |       |      |      |       |       |      |      | -6.5  | -8.2 | 14.5  |       |
|                             | water-limited |                         |       |      |      |       |       |      |      |       |      |       |       |
| $\text{WUE}_{\text{plant}}$ | well-watered  |                         |       |      |      | -8.8  |       | 8.2  |      | 5.7   |      | 15.1  | -17.1 |
|                             | water-limited |                         |       |      |      | -10.5 |       |      |      |       |      | 8.6   | -16.1 |

Filled cells represent QTL, and the number in the cell is the proportion of additive variance explained (%) by the QTL, which can have a positive or negative effect on the trait. All QTL found in the experiment are included in Table S3.

**Table 4**  $\delta^{13}\text{C}_{\text{leaf}}$  and the regression slope of the relationship between biomass and transpiration at the allele class level.

| Allele class | Well-watered treatment        |                |          |    |                                     | Water-limited treatment |                |          |    |                                     |
|--------------|-------------------------------|----------------|----------|----|-------------------------------------|-------------------------|----------------|----------|----|-------------------------------------|
|              | Slope                         | R <sup>2</sup> | P        | n  | $\delta^{13}\text{C}_{\text{leaf}}$ | Slope                   | R <sup>2</sup> | P        | n  | $\delta^{13}\text{C}_{\text{leaf}}$ |
| AAA          | 7.02 ± 0.63                   | 0.88           | < 0.0001 | 26 | -13.7 ± 0.08                        | 13.01 ± 1.55            | 0.77           | < 0.0001 | 26 | -14.36 ± 0.07                       |
| AAB          | 7.11 ± 0.46                   | 0.78           | < 0.0001 | 64 | -13.15 ± 0.04                       | 11.08 ± 0.87            | 0.62           | < 0.0001 | 64 | -14.28 ± 0.05                       |
| ABA          | Not present in RIL population |                |          |    |                                     |                         |                |          |    |                                     |
| ABB          | 7.71 ± 3.04                   | 0.53           | 0.16     | 7  | -13.8 ± 0.07                        | 11.79 ± 1.63            | 0.93           | 0.008    | 7  | -14.24 ± 0.16                       |
| BBB          | 12.09 ± 1.33                  | 0.90           | < 0.0001 | 13 | -13.91 ± 0.07                       | 14.00 ± 2.68            | 0.74           | 0.003    | 13 | -14.42 ± .13                        |
| BBA          | 11.71 ± 2.44                  | 0.78           | 0.008    | 10 | -14.0 ± 0.09                        | 20.70 ± 3.24            | 0.90           | 0.004    | 10 | -14.60 ± 0.10                       |
| BAB          | 7.14 ± 0.30                   | 0.90           | < 0.0001 | 68 | -13.44 ± 0.04                       | 10.97 ± 0.73            | 0.74           | < 0.0001 | 68 | -14.23 ± 0.05                       |
| BAA          | 9.50 ± 0.85                   | 0.84           | < 0.0001 | 28 | -13.79 ± 0.09                       | 45.56 ± 7.96            | 0.46           | 0.0005   | 28 | -14.43 ± 0.08                       |

The allele class 'ABA' was not present in this RIL population. These slopes ± SEM are from the relationship found in figure 4a and are also plotted against  $\delta^{13}\text{C}_{\text{leaf}} \pm \text{SEM}$  in figure 4b.

## Figure captions

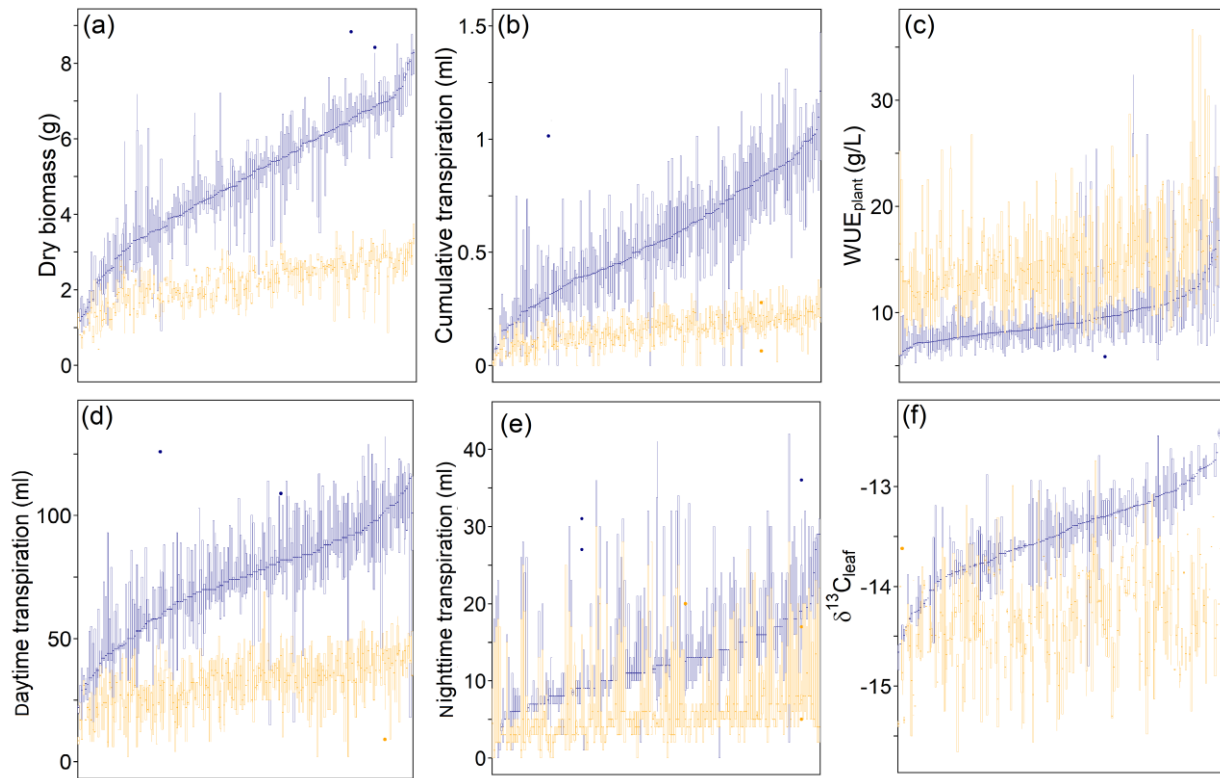

| Treatment       | Correlation (r) with $\delta^{13}\text{C}_{\text{leaf}}$ |               |                             |                  |                    |
|-----------------|----------------------------------------------------------|---------------|-----------------------------|------------------|--------------------|
|                 | Dry biomass                                              | Transpiration | $\text{WUE}_{\text{plant}}$ | $T_{\text{day}}$ | $T_{\text{night}}$ |
| Well-watered    | 0.31                                                     | 0.40          | -0.47                       | 0.42             | 0.25               |
| Water-limited   | -0.02                                                    | 0.01          | -0.14                       | 0.04             | -0.08              |
| Both treatments | 0.62                                                     | 0.66          | -0.60                       | 0.69             | 0.52               |

**Fig. 1** Ordered boxplots of dry biomass (A), transpiration (B),  $\text{WUE}_{\text{plant}}$  (C),  $T_{\text{day}}$  (D),  $T_{\text{night}}$  (E), and  $\delta^{13}\text{C}_{\text{leaf}}$  (F). All traits were measured on day 27 at peak growth, except  $\delta^{13}\text{C}_{\text{leaf}}$ , which was measured on leaves collected at the end of the experiment on day 34. Treatment effect was significant for all traits. The table below shows the correlation coefficients of each trait from day 27 with  $\delta^{13}\text{C}_{\text{leaf}}$ .



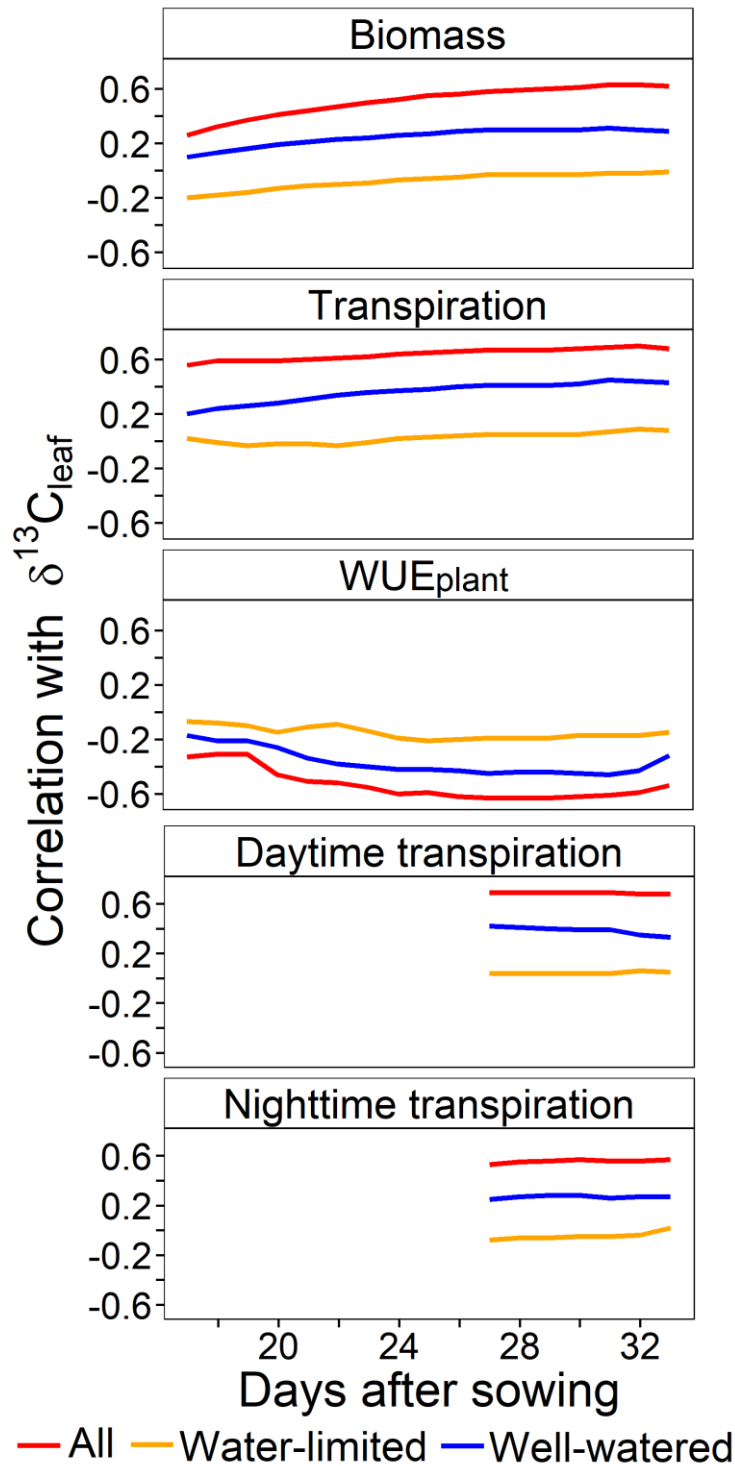

**Fig. 2** Correlation ( $r$ ) of dry biomass, transpiration,  $\text{WUE}_{\text{plant}}$ ,  $T_{\text{day}}$ , and  $T_{\text{night}}$  with  $\delta^{13}\text{C}_{\text{leaf}}$  through the course of the experiment.  $T_{\text{day}}$  and  $T_{\text{night}}$  were only available from day 27 to 33 because the daily irrigation schedule shifted to water when the lights turned on in the morning and when the lights turned off at night.

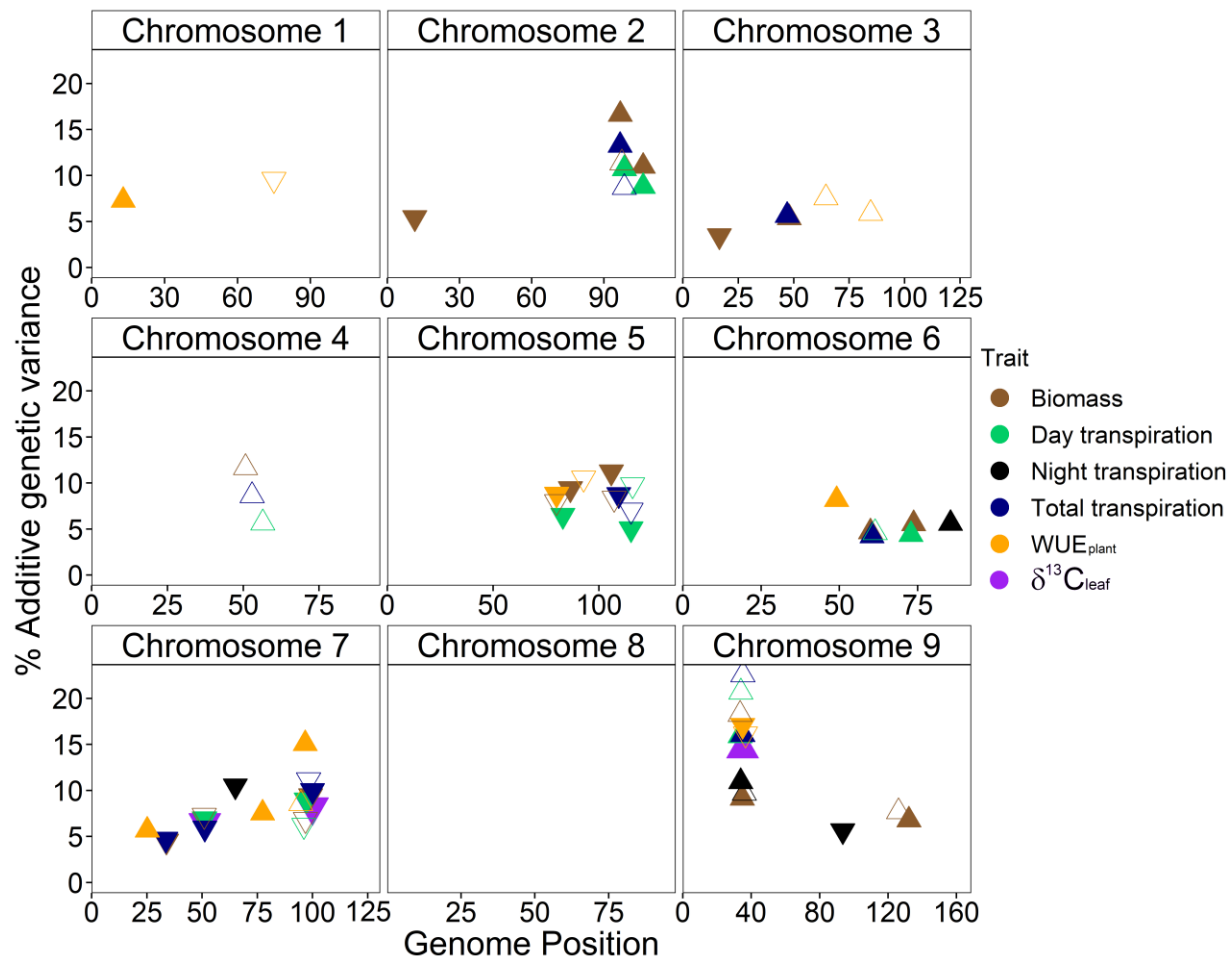

**Fig. 3** Percent additive genetic variance of QTL of whole plant traits and  $\delta^{13}\text{C}_{\text{leaf}}$ , which was measured on leaves collected at the end of the experiment. Up-pointing and down-pointing triangles represent positive and negative mean proportional additive genetic variance, respectively. Filled and open triangles represent QTL from the well-watered and water-limited treatments, respectively.

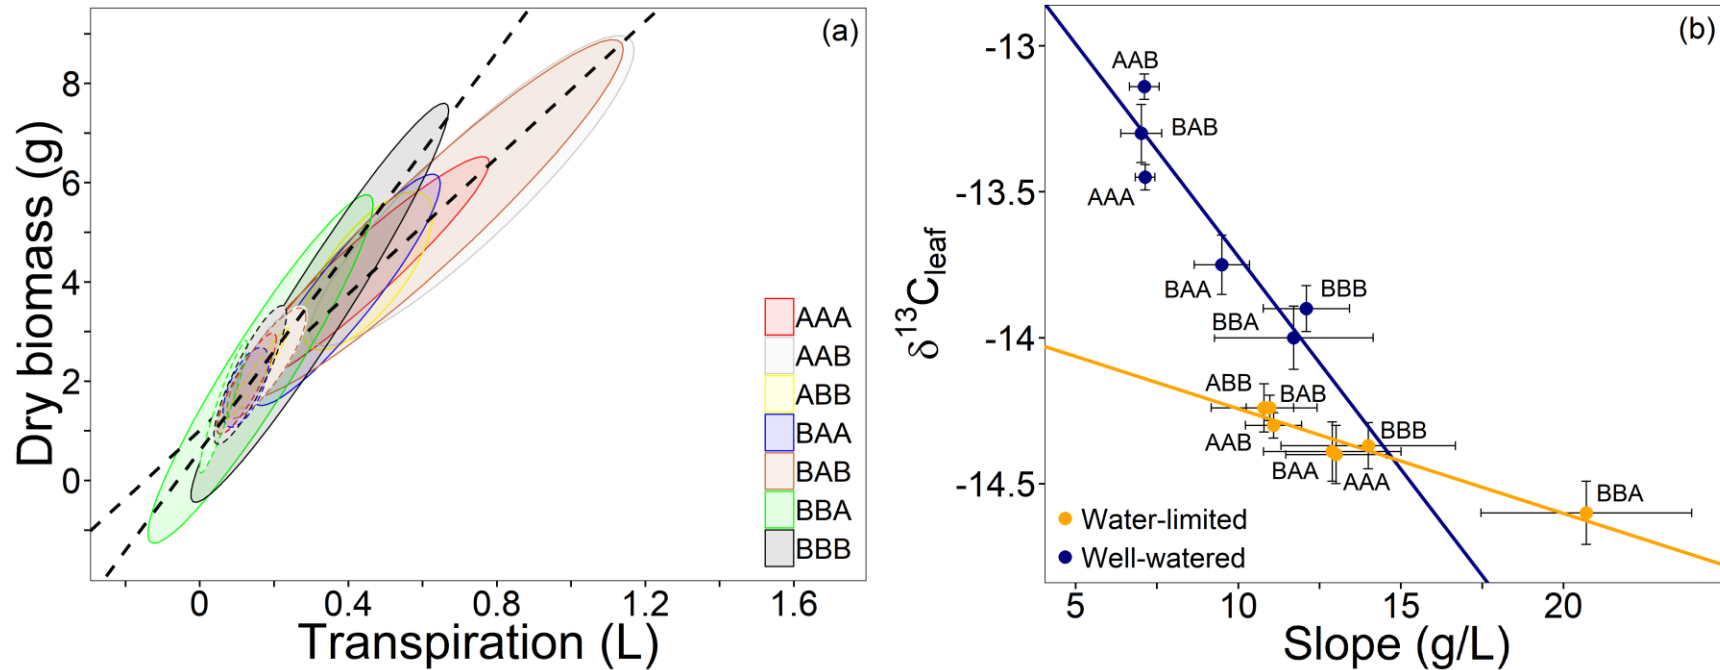

**Fig. 4** The effect of allele class on dry biomass, transpiration, and  $\delta^{13}C_{leaf}$ . In panel (a), QTL 7@51, 7@99, and 9@34 were combined to produce seven allele classes where the first letter represents the allele at QTL 7@51, the second letter represents the allele at QTL 7@99, and the third letter represents the allele at QTL 9@34. The letter 'A' represents the allele from the A10 parental accession (*Setaria viridis*), and 'B' represents the allele from the B100 parental accession (*Setaria italica*). Ellipses represent 95 % confidence intervals for the relationship of dry biomass and transpiration, and the slope of this relationship for each allele class was significant, except for allele class 'ABB' in the well-watered treatment ( $P < 0.0001$ ). In panel (b),  $\delta^{13}C_{leaf} \pm SEM$  is regressed against the slope of relationship  $\pm SEM$  in panel (a), excluding the non-significant slope for 'ABB'. The slope is the  $WUE_{plant}$  for an entire allele class. The regression for  $\delta^{13}C_{leaf}$  versus slope was significant in the well-watered ( $\delta^{13}C_{leaf} = -0.146 \text{ slope} - 12.27$ ;  $R^2 = 0.88$ ;  $P = 0.006$ ) and in the water-limited treatments ( $\delta^{13}C_{leaf} = -0.0358 \text{ slope} - 13.89$ ;  $R^2 = 0.92$ ,  $P = 0.0007$ ).

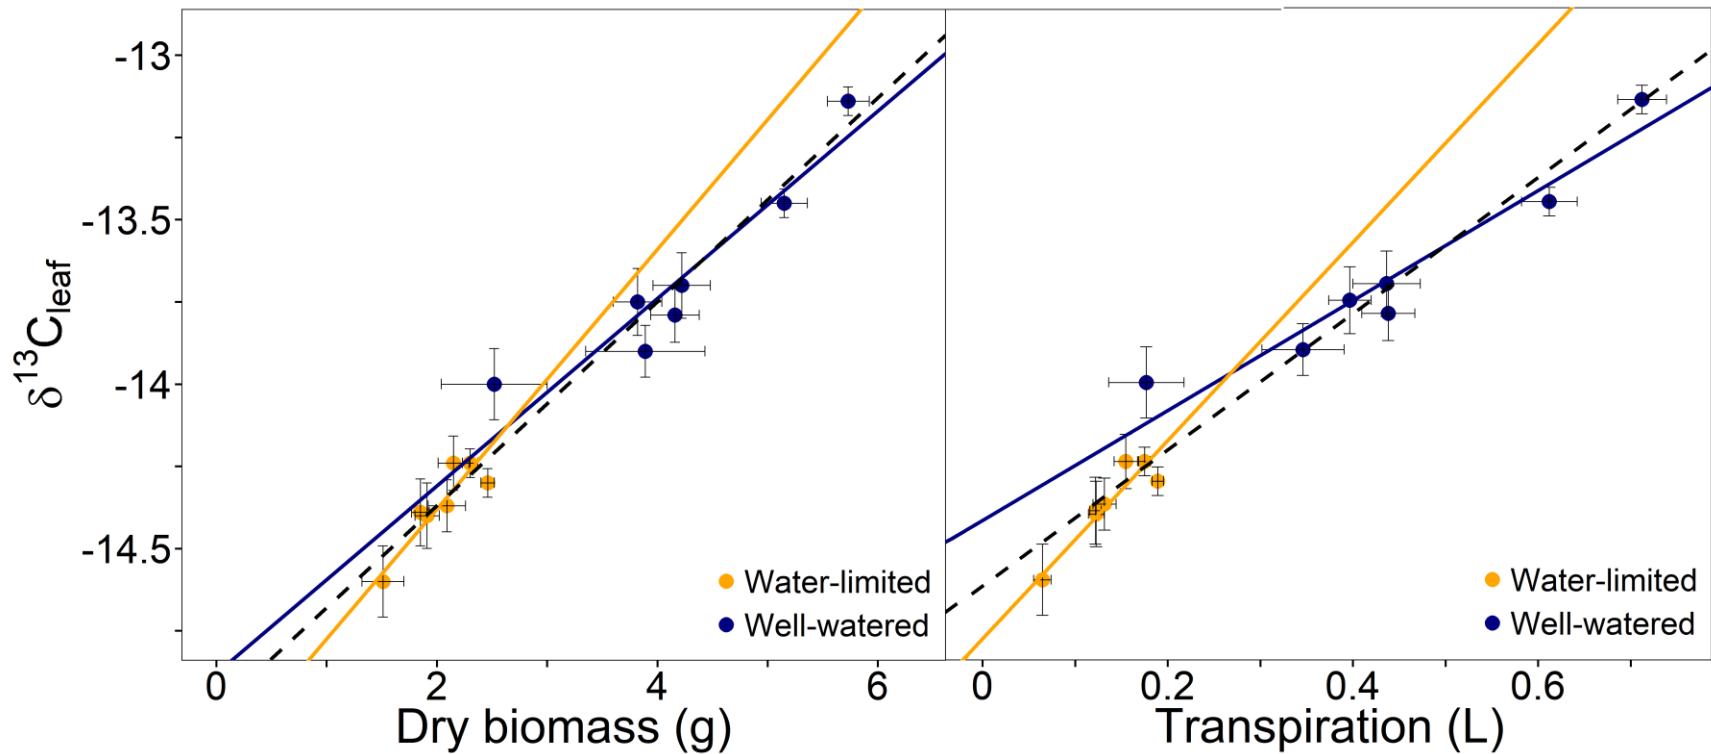

**Fig. 5** The effect of allele class on the relationship of dry biomass and cumulative transpiration with  $\delta^{13}\text{C}_{\text{leaf}}$ . Like in Fig. 4, QTL 7@51, 7@99 and 9@34 were combined to produce seven allele classes. In panel **a**, the mean  $\delta^{13}\text{C}_{\text{leaf}}$  was regressed against dry biomass for each treatment and both combined ( $\delta^{13}\text{C}_{\text{leaf}} = 0.285$  dry biomass  $- 14.88$ ;  $R^2 = 0.87$ ;  $P = 0.002$  for well-watered;  $\delta^{13}\text{C}_{\text{leaf}} = 0.395$  dry biomass  $- 15.17$ ;  $R^2 = 0.78$ ;  $P = 0.008$  for water-limited;  $\delta^{13}\text{C}_{\text{leaf}} = 0.310$  dry biomass  $- 14.99$ ;  $R^2 = 0.96$ ;  $P < 0.0001$  for both treatments combined). In panel **b**,  $\delta^{13}\text{C}_{\text{leaf}}$  is regressed against cumulative transpiration for treatment and both treatments combined ( $\delta^{13}\text{C}_{\text{leaf}} = 1.67$  transpiration  $- 14.42$ ;  $R^2 = 0.92$ ;  $P = 0.0006$  for well-watered;  $\delta^{13}\text{C}_{\text{leaf}} = 3.016$  transpiration  $- 14.78$ ;  $R^2 = 0.85$ ;  $P = 0.003$  for water-limited;  $\delta^{13}\text{C}_{\text{leaf}} = 2.07$  transpiration  $- 14.62$ ;  $R^2 = 0.95$ ;  $P < 0.0001$  for both treatments). Regression of both treatments combined is identified by black, dashed line.

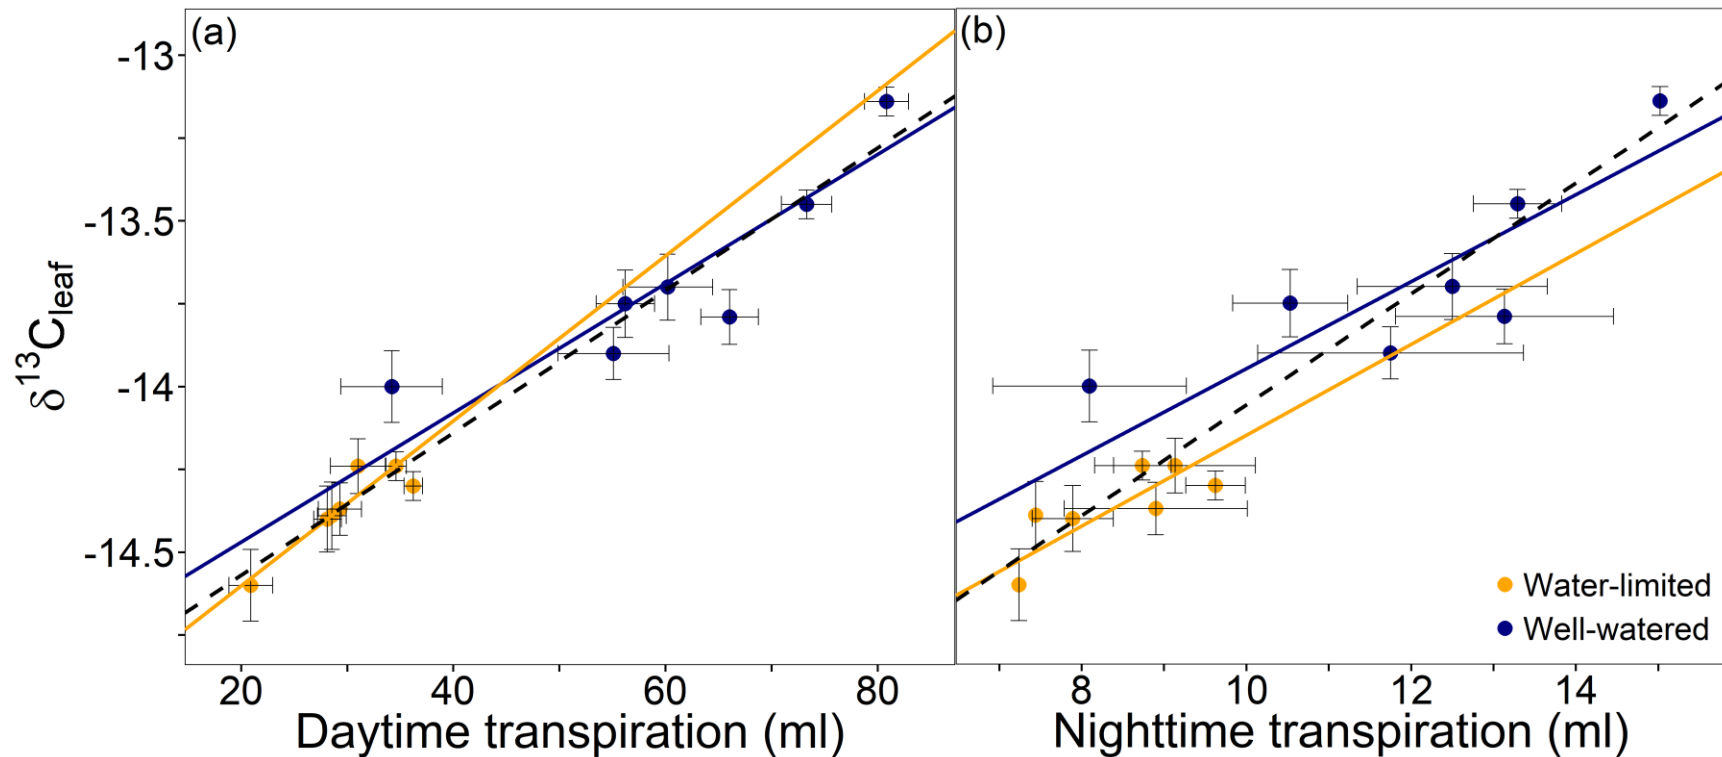

**Fig. 6** The effect of allele class on the relationship of  $T_{\text{day}}$  and  $T_{\text{night}}$  with  $\delta^{13}\text{C}_{\text{leaf}}$ . Like in Fig. 4, QTL 7@51, 7@99 and 9@34 were combined to produce seven allele classes. In panel (a), the mean  $\delta^{13}\text{C}_{\text{leaf}}$  was regressed against  $T_{\text{day}}$  and  $T_{\text{night}}$  for each treatment and both combined ( $\delta^{13}\text{C}_{\text{leaf}} = 0.0195 T_{\text{day}} - 14.86$ ;  $R^2 = 0.78$ ;  $P = 0.008$  for well-watered;  $\delta^{13}\text{C}_{\text{leaf}} = 0.0249 T_{\text{day}} - 15.10$ ;  $R^2 = 0.81$ ;  $P = 0.006$  for water-limited;  $\delta^{13}\text{C}_{\text{leaf}} = 0.0215 T_{\text{day}} - 15.00$ ;  $R^2 = 0.93$ ;  $P < 0.0001$ ). In panel (b),  $\delta^{13}\text{C}_{\text{leaf}}$  is regressed against  $T_{\text{night}}$  for each treatment and both treatments combined ( $\delta^{13}\text{C}_{\text{leaf}} = 0.131 T_{\text{night}} - 15.26$ ;  $R^2 = 0.67$ ;  $P = 0.02$  for well-watered;  $\delta^{13}\text{C}_{\text{leaf}} = 0.137 T_{\text{night}} - 15.52$ ;  $R^2 = 0.60$ ;  $P = 0.04$  for water-limited;  $\delta^{13}\text{C}_{\text{leaf}} = 0.167 T_{\text{night}} - 15.73$ ;  $R^2 = 0.85$ ;  $P < 0.0001$  for both treatments). Regression of both treatments combined is identified by black, dashed line. These values of transpiration represent transpiration on day 27 only because day 27 was the first day that  $T_{\text{day}}$  and  $T_{\text{night}}$  could be separated.

## References Cited

- Adiredjo AL, Navaud O, Muños S, Langlade NB, Lamaze T, Grieu P. 2014.** Genetic control of water use efficiency and leaf carbon isotope discrimination in sunflower (*Helianthus annuus* L.) subjected to two drought scenarios. *PLoS ONE* **9**(7): e101218-e101218.
- Araus JL, Cabrera-Bosquet L, Serret MD, Bort J, Nieto-Taladriz MT. 2013.** Comparative performance of  $\delta^{13}\text{C}$ ,  $\delta^{18}\text{O}$  and  $\delta^{15}\text{N}$  for phenotyping durum wheat adaptation to a dryland environment. *Functional Plant Biology* **40**(6): 595-608.
- Avramova V, Meziane A, Bauer E, Blankenagel S, Eggels S, Gresset S, Grill E, Niculaes C, Ouzunova M, Poppenberger B. 2018.** Carbon isotope composition, water use efficiency, and drought sensitivity are controlled by a common genomic segment in maize. *Theoretical and Applied Genetics*: 1-11.
- Bellasio C, Griffiths H. 2014.** Acclimation of  $\text{C}_4$  metabolism to low light in mature maize leaves could limit energetic losses during progressive shading in a crop canopy. *Journal of Experimental Botany* **65**(13): 3725-3736.
- Bellasio C, Griffiths H. 2014a.** Acclimation to low light by  $\text{C}_4$  maize: implications for bundle sheath leakiness. *Plant, Cell & Environment* **37**(5): 1046-1058.
- Bellasio C, Griffiths H. 2014b.** The operation of two decarboxylases, transamination, and partitioning of  $\text{C}_4$  metabolic processes between mesophyll and bundle sheath cells allows light capture to be balanced for the maize  $\text{C}_4$  pathway. *Plant Physiology* **164**(1): 466-480.
- Bierhuizen J, Slatyer R. 1965.** Effect of atmospheric concentration of water vapour and  $\text{CO}_2$  in determining transpiration-photosynthesis relationships of cotton leaves. *Agricultural Meteorology* **2**(4): 259-270.
- Brendel O, Le Thiec D, Scotti-Saintagne C, Bodénès C, Kremer A, Guehl J-M. 2008.** Quantitative trait loci controlling water use efficiency and related traits in *Quercus robur* L. *Tree Genetics & Genomes* **4**(2): 263-278.
- Brenna JT, Corso TN, Tobias HJ, Caimi RJ. 1997.** High-precision continuous-flow isotope ratio mass spectrometry. *Mass Spectrometry Reviews* **16**(5): 227-258.
- Cabrera-Bosquet L, Molero G, Nogués S, Araus JL. 2009.** Water and nitrogen conditions affect the relationships of  $\Delta^{13}\text{C}$  and  $\Delta^{18}\text{O}$  to gas exchange and growth in durum wheat. *Journal of Experimental Botany* **60**(6): 1633-1644.
- Cabrera-Bosquet L, Sánchez C, Araus JL. 2009.** How yield relates to ash content,  $\Delta^{13}\text{C}$  and  $\Delta^{18}\text{O}$  in maize grown under different water regimes. *Annals of Botany* **104**(6): 1207-1216.
- Cabrera-Bosquet L, Albrizio R, Nogués S, Araus JL. 2011.** Dual  $\Delta^{13}\text{C}/\delta^{18}\text{O}$  response to water and nitrogen availability and its relationship with yield in field-grown durum wheat. *Plant, Cell & Environment* **34**(3): 418-433.
- Cabrera-Bosquet L, Crossa J, von Zitzewitz J, Serret MD, Luis Araus J. 2012.** High-throughput phenotyping and genomic selection: The frontiers of crop breeding converge. *Journal of Integrative Plant Biology* **54**(5): 312-320.
- Cabrera-Bosquet L, Sánchez C, Araus JL. 2009.** Oxygen isotope enrichment ( $\Delta^{18}\text{O}$ ) reflects yield potential and drought resistance in maize. *Plant, Cell & Environment* **32**(11): 1487-1499.
- Cerasoli S, Maillard P, Scartazza A, Brugnoli E, Chaves MM, Pereira JS. 2004.** Carbon and nitrogen winter storage and remobilisation during seasonal flush growth in two-year-old cork oak (*Quercus suber* L.) saplings. *Annals of Forest Science* **61**: 721-729.

- Chambers JM, Hastie TJ. 1992.** *Statistical models in S*: Wadsworth & Brooks/Cole Advanced Books & Software Pacific Grove, CA.
- Chaves MM, Santos TP, Souza CRd, Ortuño M, Rodrigues M, Lopes C, Maroco J, Pereira JS. 2007.** Deficit irrigation in grapevine improves water-use efficiency while controlling vigour and production quality. *Annals of Applied Biology* **150**(2): 237-252.
- Condon AG, Richards RA, Farquhar GD. 1987.** Carbon isotope discrimination is positively correlated with grain yield and dry matter production in field-grown wheat. *Crop Science* **27**(5): 996-1001.
- Condon AG, Richards RA, Rebetzke GJ, Farquhar GD. 2002.** Improving intrinsic water-use efficiency and crop yield. *Crop Science* **42**(1): 122-131.
- Condon AG, Richards RA, Rebetzke GJ, Farquhar GD. 2004.** Breeding for high water-use efficiency. *Journal of Experimental Botany* **55**(407): 2447-2460.
- Coupel-Ledru A, Lebon E, Christophe A, Gallo A, Gago P, Pantin F, Doligez A, Simonneau T. 2016.** Reduced nighttime transpiration is a relevant breeding target for high water-use efficiency in grapevine. *Proceedings of the National Academy of Sciences of the United States of America* **113**(32): 8963-8968.
- Deng X-P, Shan L, Zhang H, Turner NC. 2006.** Improving agricultural water use efficiency in arid and semiarid areas of China. *Agricultural Water Management* **80**(1): 23-40.
- Des Marais DL, Razzaque S, Hernandez KM, Garvin DF, Juenger TE. 2016.** Quantitative trait loci associated with natural diversity in water-use efficiency and response to soil drying in *Brachypodium distachyon*. *Plant Science* **251**: 2-11.
- Devos KM, Wang Z, Beales J, Sasaki T, Gale M. 1998.** Comparative genetic maps of foxtail millet (*Setaria italica*) and rice (*Oryza sativa*). *Theoretical and Applied Genetics* **96**(1): 63-68.
- Dhanapal AP, Ray JD, Singh SK, Hoyos-Villegas V, Smith JR, Purcell LC, King CA, Cregan PB, Song Q, Fritschi FB. 2015.** Genome-wide association study (GWAS) of carbon isotope ratio ( $\delta^{13}\text{C}$ ) in diverse soybean [*Glycine max* (L.) Merr.] genotypes. *Theoretical and Applied Genetics* **128**(1): 73-91.
- Doust AN, Kellogg EA, Devos KM, Bennetzen JL. 2009.** Foxtail millet: a sequence-driven grass model system. *Plant Physiology* **149**(1): 137-141.
- Easlon HM, Nemali KS, Richards JH, Hanson DT, Juenger TE, McKay JK. 2014.** The physiological basis for genetic variation in water use efficiency and carbon isotope composition in *Arabidopsis thaliana*. *Photosynthesis Research* **119**(1-2): 119-129.
- Elazab A, Molero G, Serret MD, Araus JL. 2012.** Root traits and  $\delta^{13}\text{C}$  and  $\delta^{18}\text{O}$  of durum wheat under different water regimes. *Functional Plant Biology* **39**(5): 379-393.
- Ellsworth PZ, Ellsworth PV, Cousins A. 2017.** Leaf oxygen and carbon isotopic signatures reflect drought resistance and water use efficiency in the  $\text{C}_4$  grasses *Setaria viridis* and *Setaria italica*. *Journal of Experimental Botany* **68**(13): 3513-3528.
- Fahlgren N, Feldman M, Gehan MA, Wilson MS, Shyu C, Bryant DW, Hill ST, McEntee CJ, Warnasooriya SN, Kumar I. 2015.** A versatile phenotyping system and analytics platform reveals diverse temporal responses to water availability in *Setaria*. *Molecular Plant* **8**(10): 1520-1535.
- Farquhar GD. 1983.** On the nature of carbon isotope discrimination in  $\text{C}_4$  species. *Functional Plant Biology* **10**(2): 205-226.
- Farquhar GD, Ehleringer JR, Hubick KT. 1989.** Carbon isotope discrimination and photosynthesis. *Annual Review of Plant Biology* **40**(1): 503-537.

- Farquhar GD, Hubick KT, Condon AG, Richards RA 1989.** Carbon isotope fractionation and plant water-use efficiency. *Stable isotopes in ecological research*: Springer, 21-40.
- Farquhar GD, Richards RA. 1984.** Isotopic composition of plant carbon correlates with water-use efficiency of wheat genotypes. *Australian Journal of Plant Physiology* **11**(6): 539-552.
- Feldman MJ, Ellsworth PZ, Fahlgren N, Gehan MA, Cousins AB, Baxter I. 2018.** Trait components of whole plant water use efficiency are defined by unique, environmentally responsive genetic signatures in the model C<sub>4</sub> grass *Setaria*. *Plant Physiology*.
- Feldman MJ, Paul RE, Banan D, Barrett JF, Sebastian J, Yee M-C, Jiang H, Lipka AE, Brutnell TP, Dinneny JR, et al. 2017.** Time dependent genetic analysis links field and controlled environment phenotypes in the model C<sub>4</sub> grass *Setaria*. *PLoS Genetics* **13**(6): e1006841.
- Flexas J, Galmés J, Gallé A, Gullás J, Pou A, Ribas-Carbo M, Tomás M, Medrano H. 2010.** Improving water use efficiency in grapevines: potential physiological targets for biotechnological improvement. *Australian Journal of Grape and Wine Research* **16**: 106-121.
- Ghannoum O. 2016.** How can we breed for more water use-efficient sugarcane? *Journal of Experimental Botany* **67**(3): 557-559.
- Gibberd MR, Walker RR, Blackmore DH, Condon AG. 2001.** Transpiration efficiency and carbon-isotope discrimination of grapevines grown under well-watered conditions in either glasshouse or vineyard. *Australian Journal of Grape and Wine Research* **7**(3): 110-117.
- Gresset S, Westermeier P, Rademacher S, Ouzunova M, Presterl T, Westhoff P, Schon CC. 2014.** Stable carbon isotope discrimination is under genetic control in the C<sub>4</sub> species maize with several genomic regions influencing trait expression. *Plant Physiology* **164**(1): 131-143.
- Henderson S, Von Caemmerer S, Farquhar GD, Wade L, Hammer G. 1998.** Correlation between carbon isotope discrimination and transpiration efficiency in lines of the C<sub>4</sub> species *Sorghum bicolor* in the glasshouse and the field. *Functional Plant Biology* **25**(1): 111-123.
- Henderson SA, Caemmerer SV, Farquhar GD. 1992.** Short-term measurements of carbon isotope discrimination in several C<sub>4</sub> species. *Functional Plant Biology* **19**(3): 263-285.
- Juenger TE, McKay JK, Hausmann N, Keurentjes JJB, Sen S, Stowe KA, Dawson TE, Simms EL, Richards JH. 2005.** Identification and characterization of QTL underlying whole-plant physiology in *Arabidopsis thaliana*:  $\delta^{13}\text{C}$ , stomatal conductance and transpiration efficiency. *Plant, Cell & Environment* **28**(6): 697-708.
- Kromdijk J, Ubierna N, Cousins AB, Griffiths H. 2014.** Bundle-sheath leakiness in C<sub>4</sub> photosynthesis: a careful balancing act between CO<sub>2</sub> concentration and assimilation. *Journal of Experimental Botany* **65**(13): 3443-3457.
- Kubásek J, Šetlík J, Dwyer S, Šantrůček J. 2007.** Light and growth temperature alter carbon isotope discrimination and estimated bundle sheath leakiness in C<sub>4</sub> grasses and dicots. *Photosynthesis Research* **91**(1): 47-58.
- Kwak I-Y, Moore CR, Spalding EP, Broman KW. 2016.** Mapping quantitative trait loci underlying function-valued traits using functional principal component analysis and multi-trait mapping. *G3: Genes/ Genomes/ Genetics* **6**(1): 79-86.



- Lambrides C, Chapman S, Shorter R. 2004.** Genetic variation for carbon isotope discrimination in sunflower. *Crop Science* **44**(5): 1642-1653.
- Masle J, Gilmore SR, Farquhar GD. 2005.** The ERECTA gene regulates plant transpiration efficiency in *Arabidopsis*. *Nature* **436**(7052): 866-870.
- McKay JK, Richards JH, Nemali KS, Sen S, Mitchell-Olds T, Boles S, Stahl EA, Wayne T, Juenger TE. 2008.** Genetics of drought adaptation in *Arabidopsis thaliana* II. QTL Analysis of a new mapping population, Kas-1× Tsu-1. *Evolution* **62**(12): 3014-3026.
- Medrano H, Tomás M, Martorell S, Escalona J-M, Pou A, Fuentes S, Flexas J, Bota J. 2015a.** Improving water use efficiency of vineyards in semi-arid regions. A review. *Agronomy for Sustainable Development* **35**(2): 499-517.
- Medrano H, Tomás M, Martorell S, Flexas J, Hernández E, Rosselló J, Pou A, Escalona J-M, Bota J. 2015b.** From leaf to whole-plant water use efficiency (WUE) in complex canopies: limitations of leaf WUE as a selection target. *The Crop Journal* **3**(3): 220-228.
- Monneveux P, Sheshshayee MS, Akhter J, Ribaut J-M. 2007.** Using carbon isotope discrimination to select maize (*Zea mays* L.) inbred lines and hybrids for drought tolerance. *Plant Science* **173**(4): 390-396.
- Mook WG, Bommerson JC, Staverman WH. 1974.** Carbon isotope fractionation between dissolved bicarbonate and gaseous carbon dioxide. *Earth and Planetary Science Letters* **22**(2): 169-176.
- Morison JI, Baker NR, Mullineaux PM, Davies WJ. 2008.** Improving water use in crop production. *Philosophical Transactions of the Royal Society of London B: Biological Sciences* **363**(1491): 639-658.
- Passioura J. 1977.** Grain yield, harvest index, and water use of wheat. *Journal of the Australian Institute of Agricultural Science* **43**: 117-120.
- Pinto H, Powell JR, Sharwood RE, Tissue DT, Ghannoum O. 2015.** Variations in nitrogen use efficiency reflect the biochemical subtype while variations in water use efficiency reflect the evolutionary lineage of C<sub>4</sub> grasses at inter-glacial CO<sub>2</sub>. *Plant, Cell & Environment* **39**(3): 514-526.
- Poni S, Bernizzoni F, Civardi S, Gatti M, Porro D, Camin F. 2009.** Performance and water-use efficiency (single-leaf vs. whole-canopy) of well-watered and half-stressed split-root Lambrusco grapevines grown in Po Valley (Italy). *Agriculture, Ecosystems & Environment* **129**(1): 97-106.
- Qi H, Coplen TB, Geilmann H, Brand WA, Böhlke JK. 2003.** Two new organic reference materials for  $\delta^{13}\text{C}$  and  $\delta^{15}\text{N}$  measurements and a new value for the  $\delta^{13}\text{C}$  of NBS 22 oil. *Rapid Communications in Mass Spectrometry* **17**(22): 2483-2487.
- R\_Core\_Team 2013.** R: A language and environment for statistical computing. Vienna, Austria: R Foundation for Statistical Computing.
- Rebetzke GJ, Condon AG, Farquhar GD, Appels R, Richards RA. 2008.** Quantitative trait loci for carbon isotope discrimination are repeatable across environments and wheat mapping populations. *Theoretical and Applied Genetics* **118**(1): 123-137.
- Richards RA, Hunt JR, Kirkegaard JA, Passioura JB. 2014.** Yield improvement and adaptation of wheat to water-limited environments in Australia—a case study. *Crop and Pasture Science* **65**(7): 676-689.
- Sage RF. 2014.** Stopping the leaks: new insights into C<sub>4</sub> photosynthesis at low light. *Plant, Cell & Environment* **37**(5): 1037-1041.

- Santrock J, Studley SA, Hayes JM. 1985.** Isotopic analyses based on the mass spectra of carbon dioxide. *Analytical Chemistry* **57**(7): 1444-1448.
- Saranga Y, Jiang CX, Wright R, Yakir D, Paterson A. 2004.** Genetic dissection of cotton physiological responses to arid conditions and their inter-relationships with productivity. *Plant, Cell & Environment* **27**(3): 263-277.
- Seibt U, Rajabi A, Griffiths H, Berry JA. 2008.** Carbon isotopes and water use efficiency: sense and sensitivity. *Oecologia* **155**(3): 441-454.
- Sharwood RE, Sonawane BV, Ghannoum O. 2014.** Photosynthetic flexibility in maize exposed to salinity and shade. *Journal of Experimental Botany* **65**(13): 3715-3724.
- Sinclair TR, Tanner C, Bennett J. 1984.** Water-use efficiency in crop production. *Bioscience* **34**(1): 36-40.
- Sonawane BV, Sharwood RE, von Caemmerer S, Whitney SM, Ghannoum O. 2017.** Short-term thermal photosynthetic responses of C<sub>4</sub> grasses are independent of the biochemical subtype. *Journal of Experimental Botany* **68**(20): 5583-5597.
- Sonawane BV, Sharwood RE, Whitney S, Ghannoum O. 2018.** Shade compromises the photosynthetic efficiency of NADP-ME less than that of PEP-CK and NAD-ME C<sub>4</sub> grasses. *Journal of Experimental Botany* **69**(12): 3053-3068.
- Sun W, Ubierna N, Ma J-Y, Cousins AB. 2012.** The influence of light quality on C<sub>4</sub> photosynthesis under steady-state conditions in *Zea mays* and *Miscanthus × giganteus*: changes in rates of photosynthesis but not the efficiency of the CO<sub>2</sub> concentrating mechanism. *Plant, Cell & Environment* **35**(5): 982-993.
- Takai T, Fukuta Y, Sugimoto A, Shiraiwa T, Horie T. 2006.** Mapping of QTLs controlling carbon isotope discrimination in the photosynthetic system using recombinant inbred lines derived from a cross between two different rice (*Oryza sativa* L.) cultivars. *Plant Production Science* **9**(3): 271-280.
- Takai T, Ohsumi A, San-oh Y, Laza MRC, Kondo M, Yamamoto T, Yano M. 2009.** Detection of a quantitative trait locus controlling carbon isotope discrimination and its contribution to stomatal conductance in japonica rice. *Theoretical and Applied Genetics* **118**(7): 1401-1410.
- Tarara JM, Peña JEP, Keller M, Schreiner RP, Smithyman RP. 2011.** Net carbon exchange in grapevine canopies responds rapidly to timing and extent of regulated deficit irrigation. *Functional Plant Biology* **38**(5): 386-400.
- Terashima I, Hikosaka K. 1995.** Comparative ecophysiology of leaf and canopy photosynthesis. *Plant, Cell & Environment* **18**(10): 1111-1128.
- Teulat B, Merah O, Sirault X, Borries C, Waugh R, This D. 2002.** QTLs for grain carbon isotope discrimination in field-grown barley. *TAG Theoretical and Applied Genetics* **106**(1): 118-126.
- Thumma BR, Naidu BP, Chandra A, Cameron DF, Bahnisch LM, Liu C. 2001.** Identification of causal relationships among traits related to drought resistance in *Stylosanthes scabra* using QTL analysis. *Journal of Experimental Botany* **52**(355): 203-214.
- Tomás M, Medrano H, Escalona JM, Martorell S, Pou A, Ribas-Carbó M, Flexas J. 2014.** Variability of water use efficiency in grapevines. *Environmental and Experimental Botany* **103**: 148-157.
- Tomás M, Medrano H, Pou A, Escalona JM, Martorell S, Ribas-Carbó M, Flexas J. 2012.** Water-use efficiency in grapevine cultivars grown under controlled conditions: effects of

- water stress at the leaf and whole-plant level. *Australian Journal of Grape and Wine Research* **18**(2): 164-172.
- Twohey III RJ, Roberts LM, Studer AJ. 2018.** Leaf stable carbon isotope composition reflects transpiration efficiency in *Zea mays*. *The Plant Journal*.
- Ubierna N, Sun W, Cousins AB. 2011.** The efficiency of C<sub>4</sub> photosynthesis under low light conditions: assumptions and calculations with CO<sub>2</sub> isotope discrimination. *Journal of Experimental Botany* **62**(9): 3119-3134.
- Vadez V, Kholova J, Medina S, Kakker A, Anderberg H. 2014.** Transpiration efficiency: new insights into an old story. *Journal of Experimental Botany* **65**(21): 6141-6153.
- von Caemmerer S, Ghannoum O, Pengelly JJ, Cousins AB. 2014.** Carbon isotope discrimination as a tool to explore C<sub>4</sub> photosynthesis. *Journal of Experimental Botany* **65**(13): 3459-3470.
- Wang Z, Devos K, Liu C, Wang R, Gale M. 1998.** Construction of RFLP-based maps of foxtail millet, *Setaria italica* (L.) P. Beauv. *Theoretical and Applied Genetics* **96**(1): 31-36.
- Westgate M, Forcella F, Reicosky D, Somsen J. 1997.** Rapid canopy closure for maize production in the northern US corn belt: radiation-use efficiency and grain yield. *Field Crops Research* **49**(2-3): 249-258.
- Xu L-K, Hsiao TC. 2004.** Predicted versus measured photosynthetic water-use efficiency of crop stands under dynamically changing field environments. *Journal of Experimental Botany* **55**(407): 2395-2411.
- Xu X, Martin B, Comstock JP, Vision TJ, Tauer CG, Zhao B, Pausch RC, Knapp S. 2008.** Fine mapping a QTL for carbon isotope composition in tomato. *Theoretical and Applied Genetics* **117**(2): 221-233.
- Xu Y, This D, Pausch RC, Vonhof WM, Coburn JR, Comstock JP, McCouch SR. 2009.** Leaf-level water use efficiency determined by carbon isotope discrimination in rice seedlings: genetic variation associated with population structure and QTL mapping. *Theoretical and Applied Genetics* **118**(6): 1065-1081.
- Yousfi S, Serret MD, Márquez AJ, Voltas J, Araus JL. 2012.** Combined use of  $\delta^{13}\text{C}$ ,  $\delta^{18}\text{O}$  and  $\delta^{15}\text{N}$  tracks nitrogen metabolism and genotypic adaptation of durum wheat to salinity and water deficit. *New Phytologist* **194**(1): 230-244.
